# Supplementary material for: Quantitative transportomics identifies Kif5a as a major regulator of neurodegeneration
Source: eLife journal article supplement (doi:10.7554/elife.68148), 2022-03-08

Figure 2a Sncb western blots

### Sncb Inputs

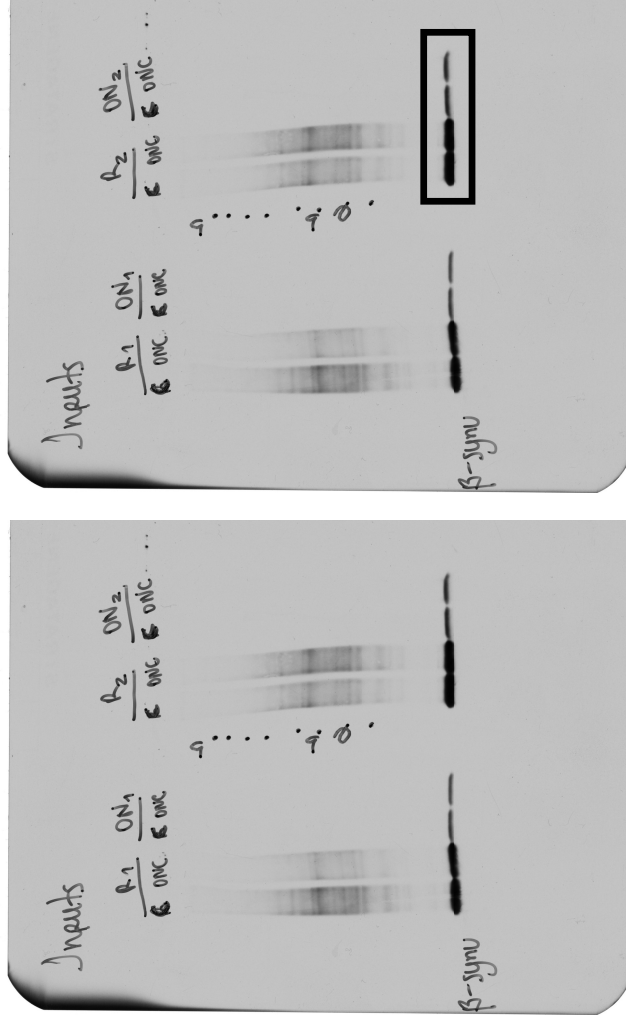

### Sncb Immunoprecipitation

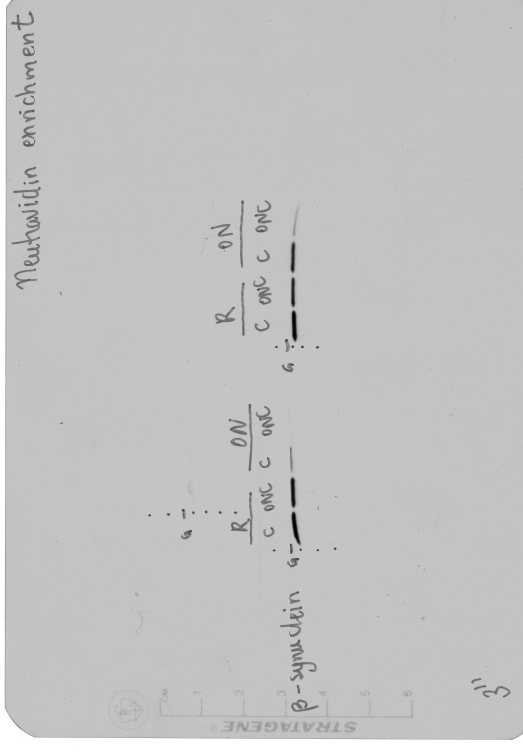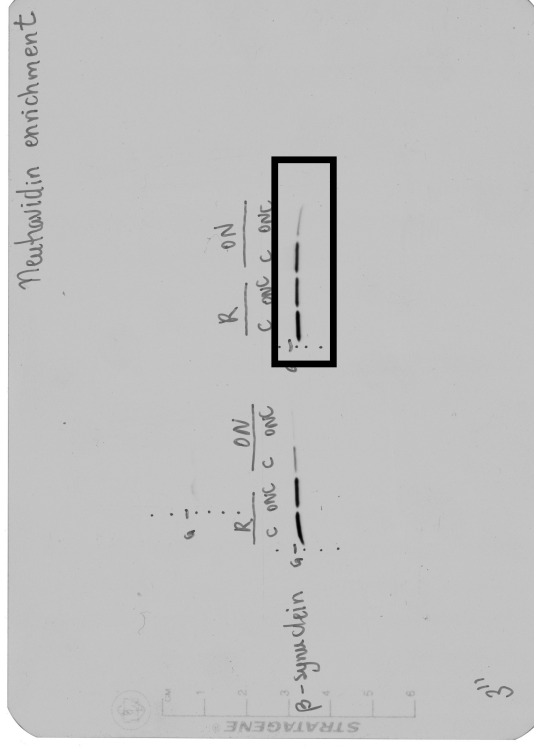

Figure 2a Gap43 western blots

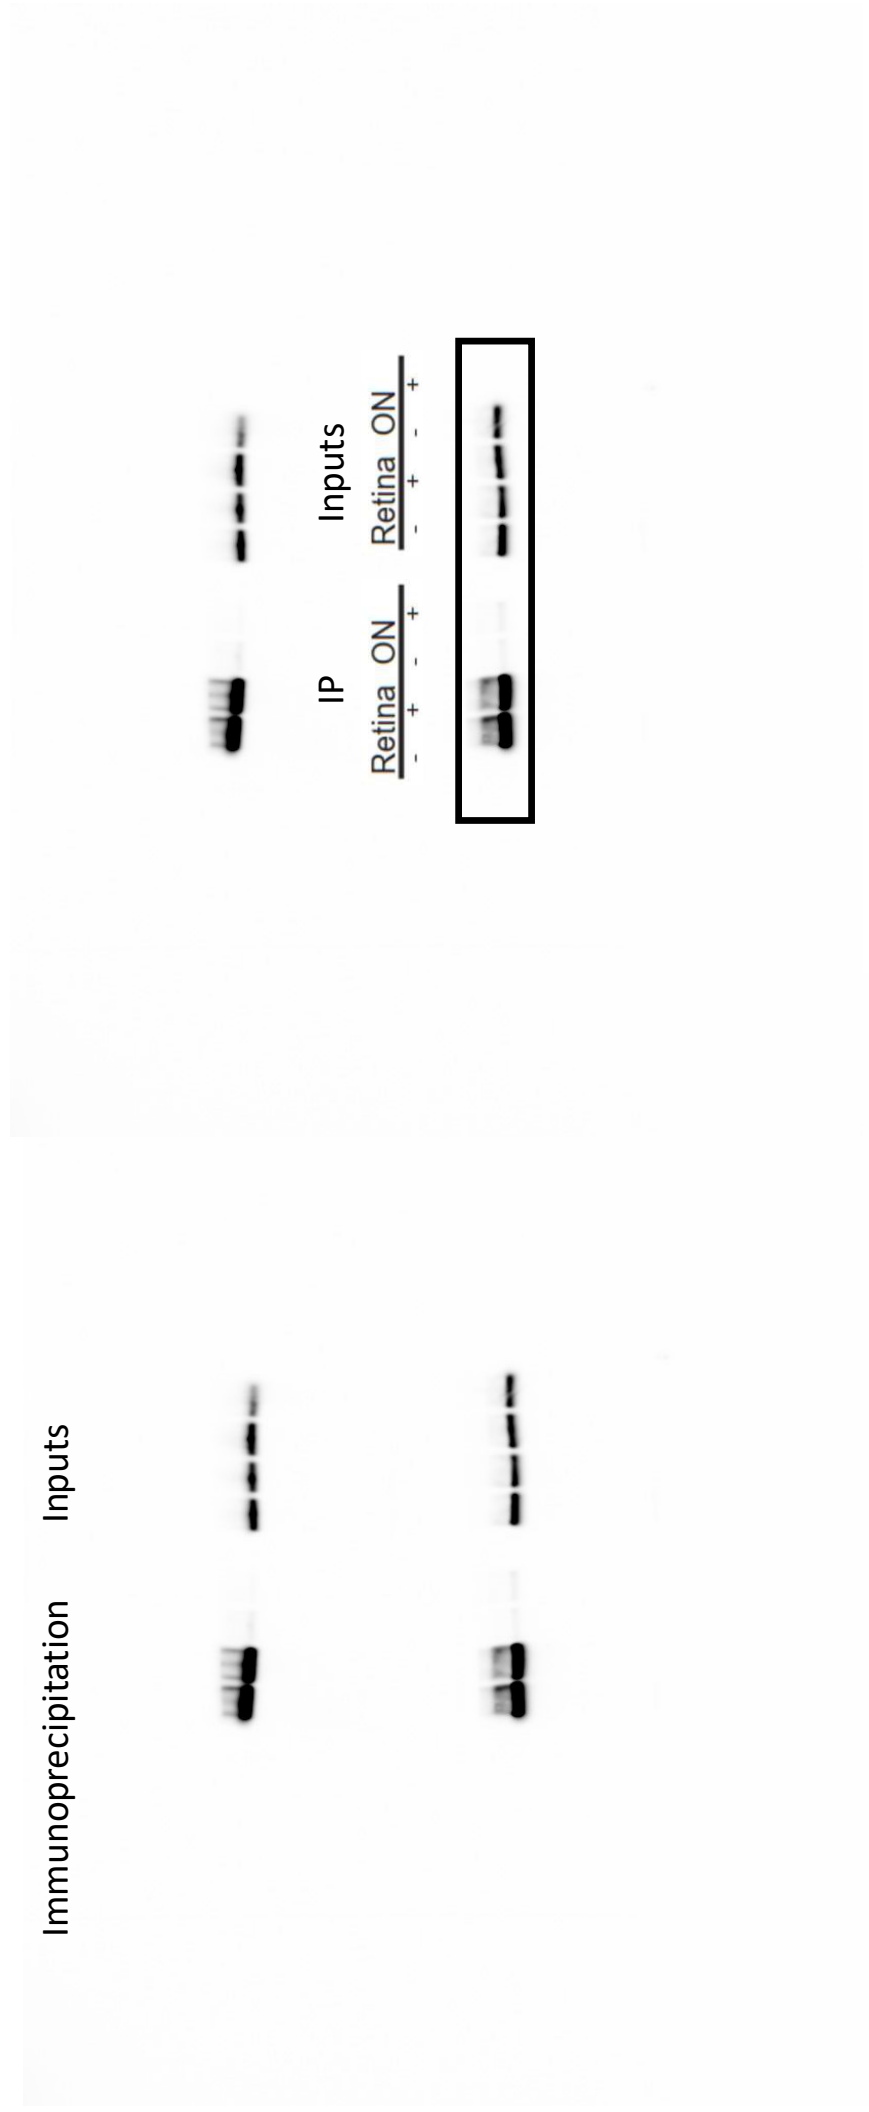

# Arf3 Immunoprecipitation

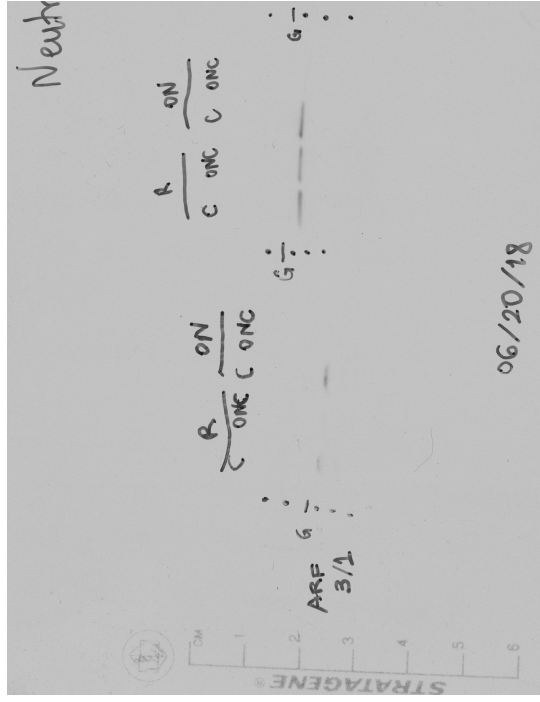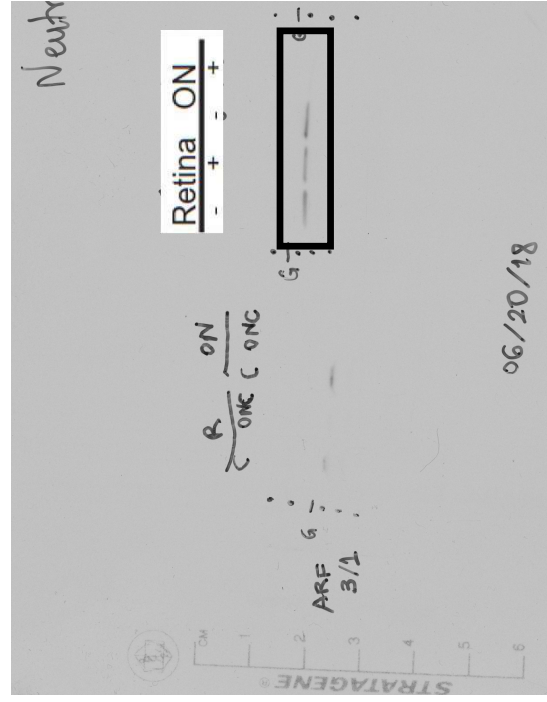

Figure 2a Arf3 western blots

## Arf3 Inputs

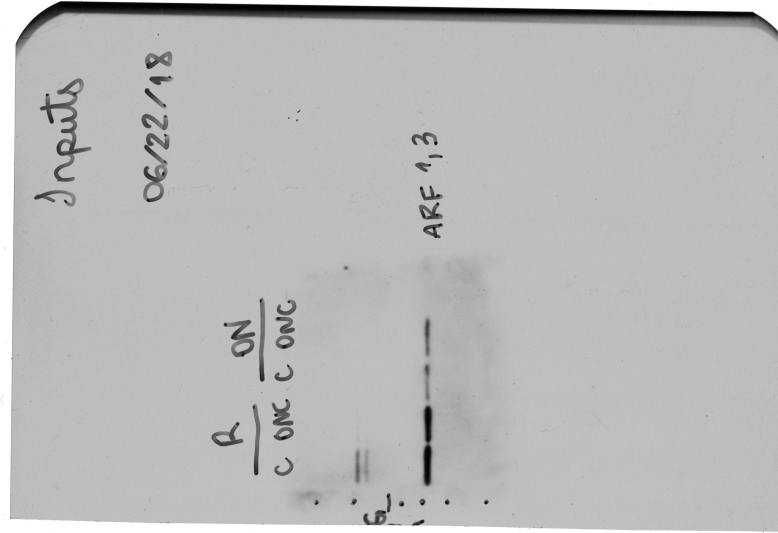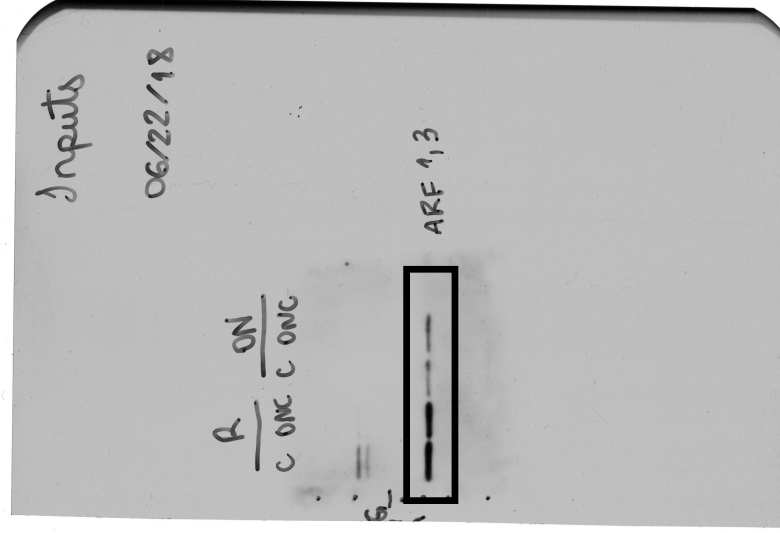

Figure 2d Kif5a WB replicate 1

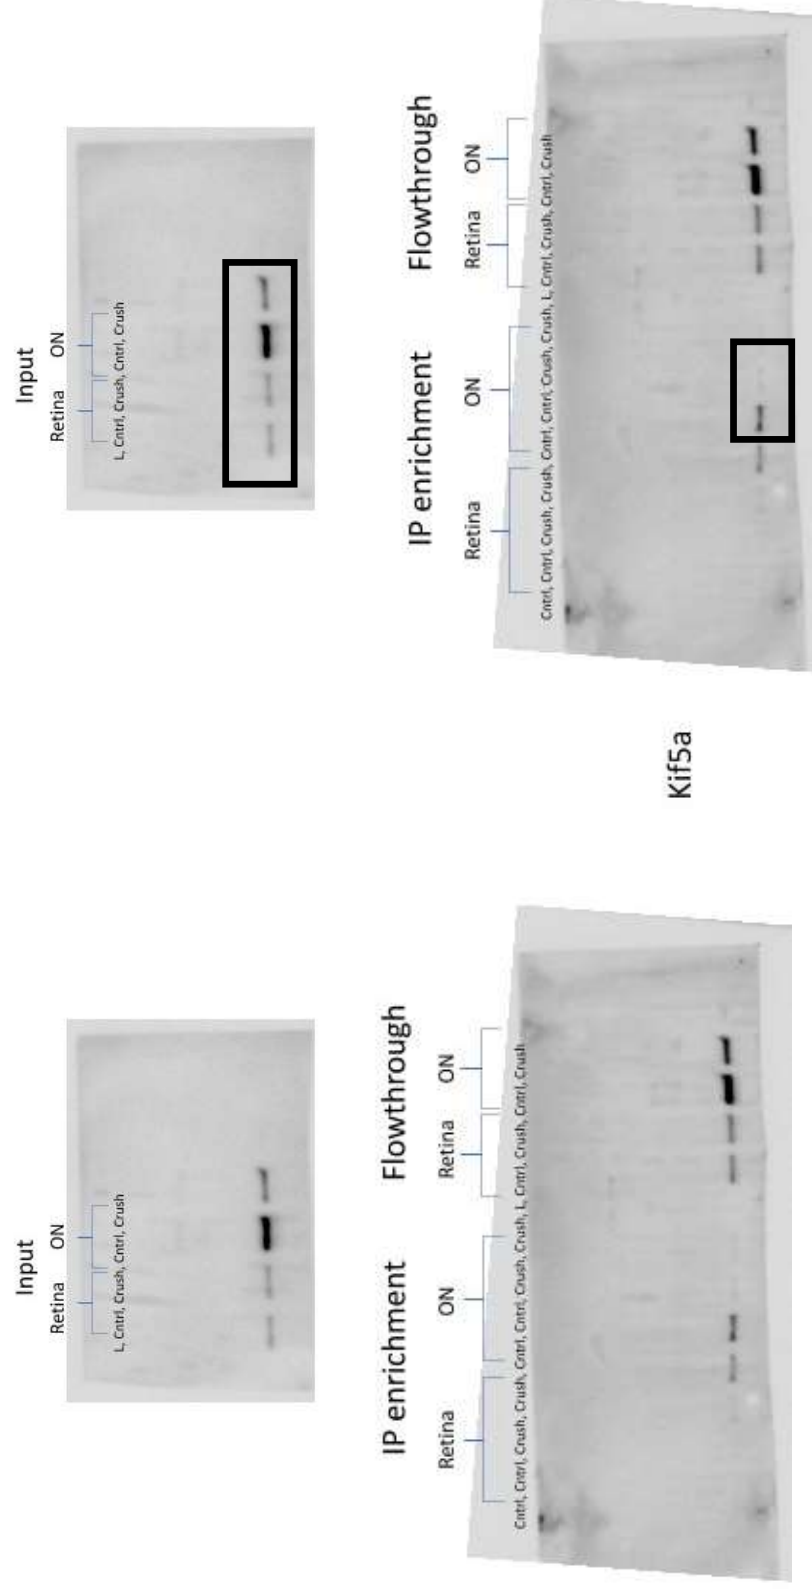

Figure 2d Kif5a WB replicate 2

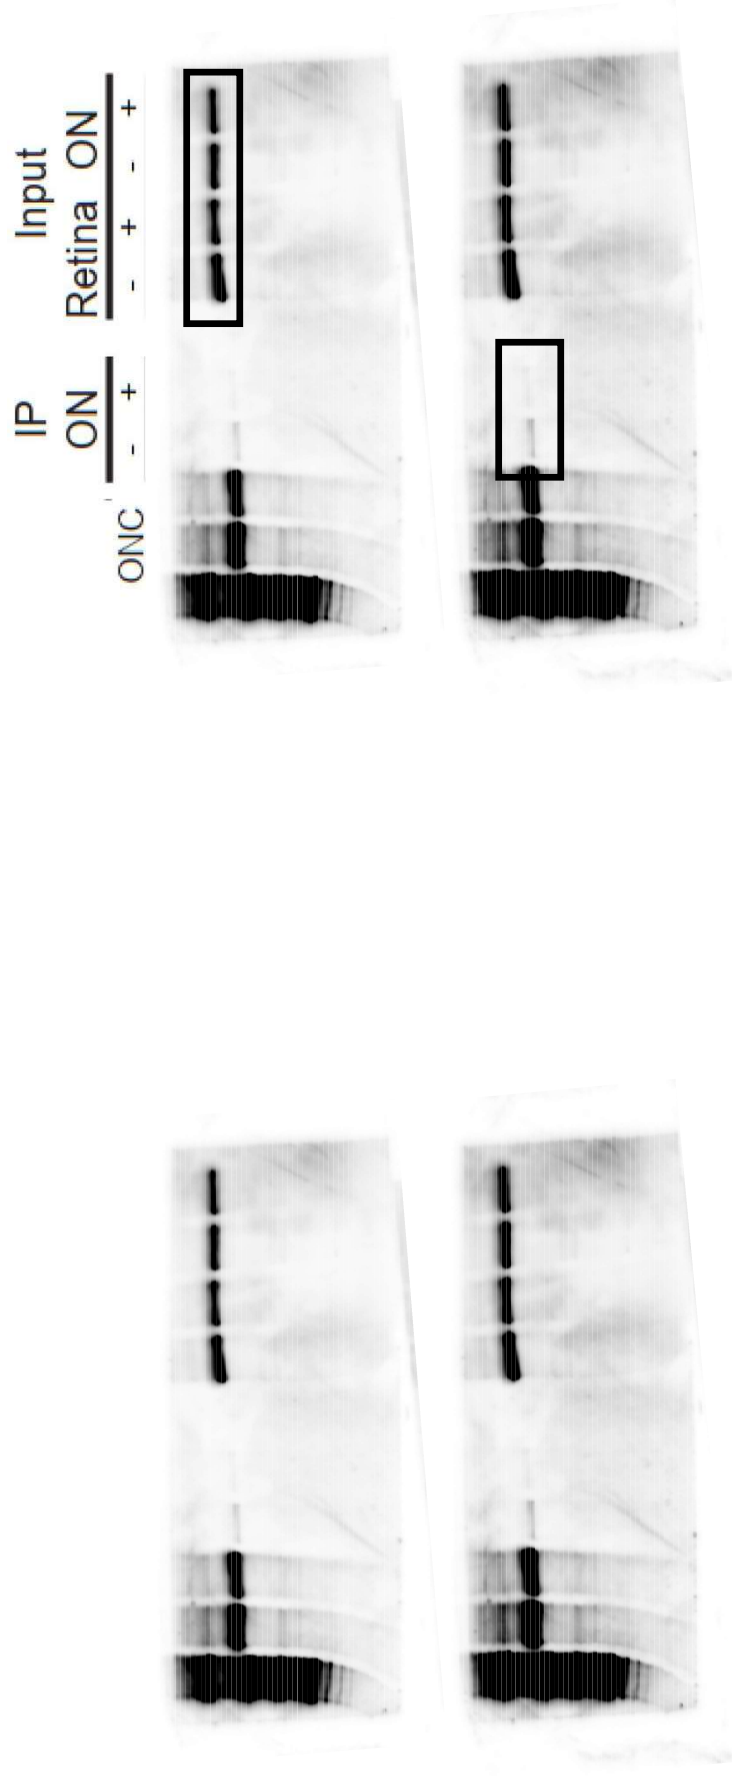

Figure 2d Kif5a WB replicate 3

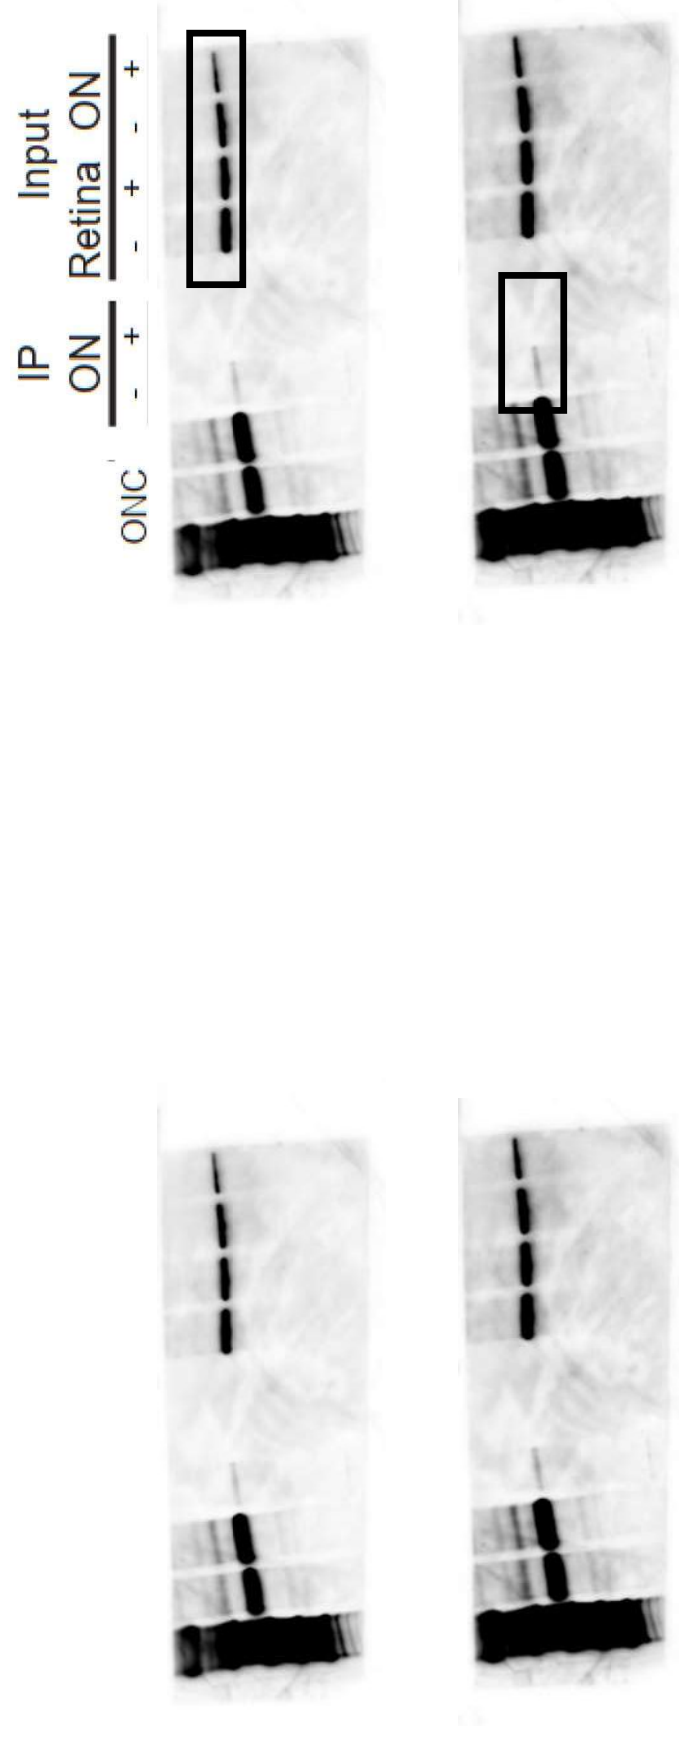

Supplement: fig2-data1 [file Figure 2- Source Data 1.pdf › Figure 2- Source Data 1.pdf]
