# Supplementary material for: Quantitative transportomics identifies Kif5a as a major regulator of neurodegeneration
Source: eLife journal article supplement (doi:10.7554/elife.68148), 2022-03-08
Supplement: fig4-data2 [file Figure 4- Source Data 2.pdf › Figure 4- Source Data 2.pdf]

Figure 4a Kif5a/Kif5c/GAPDH WB

| Cre | Retina |    | Optic nerve |    |
|-----|--------|----|-------------|----|
|     | M1     | M2 | M1          | M2 |
| +   | -      | +  | +           | -  |
| -   | -      | -  | -           | +  |
| -   | -      | -  | -           | -  |

Kif5a

GFP (cre-fusion)

Kif5c

GAPDH
