# Supplementary material for: Quantitative transportomics identifies Kif5a as a major regulator of neurodegeneration
Source: eLife. 2022 Mar 8;11:e68148. doi: 10.7554/eLife.68148 (PMC8947766; doi:10.7554/eLife.68148)
Supplement: Figure 1—source data 1. [file elife-68148-fig1-data1.xlsx]

## Sheet: Figure 1- source data 1
Legend: Proteomic quantification of transportome changes after ONC from Figure 2b.
UniProt_ID	Crush_Replicate1_NSAF	Control_Replicate1_NSAF	Crush_Replicate2_NSAF	Control_Replicate2_NSAF	Crush_Replicate3_NSAF	Control_Replicate3_NSAF	Gene_Name
P02524	0.00152524	0.00144515	0	0.0015661	0	0.001847	Crybb3
O35244	0	0.00136128	0	0.00147521	0.00123742	0.00087	Prdx6
Q8VHF5	0.000691	0	0	0.00141823	0	0.000558	Cs
Q6P7B0	0	0.00126789	0	0.001374	0.000288	0.00054	Wars
P56571	0	0.00114634	0	0.00124229	0	0.000244	NA
Q63622-6	0.000775	0.000367	0	0.000795	0.000167	0	Dlg2.6
Q63622-7	0.00074	0.00035	0	0.00076	0.000159	0	Dlg2.7
P85108	0	0.000685	0	0.000743	0	0.000292	Tubb2a
P32551	0.000712	0	0	0.000731	0.000307	0	Uqcrc2
P12346-2	0.000649	0	0	0.000666	0.00167651	0	Tf.2
Q63041	0.000215	0	0	0.000441	9.24e-05	8.66e-05	A1m
O55156	0.000308	0	0	0.000316	0	6.21e-05	Clip2
P14046	0.000436	0	0	0.000224	0.000188	0.000264	A1i3
Q62717	0	0.000237	0.000168	0	0	0.000151	Cadps
P38650	0.000277	0.000263	0.000186	7.12e-05	5.97e-05	5.59e-05	Dync1h1
P55161	0	0.00027	0.000192	0	0.000123	0	Nckap1
Q6QLM7	0	0.000594	0.000211	0	0	0.000632	Kif5a
P06687	0.000318	0	0.000214	0.00130483	0.000137	0.000128	Atp1a3
Q6RJR6	0.000342	0.000649	0.00023	0.000352	0.000295	0	Rtn3
P18484	0.000343	0	0.000231	0.000352	0.000296	6.92e-05	Ap2a2
Q05140	0.000352	0	0.000237	0.000361	0.000151	7.1e-05	Snap91
Q05140-2	0.000359	0	0.000242	0.000369	0.000155	7.25e-05	Snap91.2
P53534	0.000384	0	0.000258	0	0.000165	0.000388	Pygb
P46462	0	0.00151328	0.000269	0	0.000344	8.06e-05	Vcp
O35095	0	0.000418	0.000297	0.000453	0.00038	0.000535	Ncdn
P61765-2	0.00106742	0.000506	0.000359	0.000548	0	0.000323	Stxbp1.2
P61765	0.00108359	0.000513	0.000364	0.000556	0	0.000328	Stxbp1
P38652	0.000573	0	0.000385	0	0	0.000693	Pgm1
P37285	0	0.000545	0.000387	0	0.000742	0.000812	Klc1
P37285-3	0	0.000553	0.000393	0	0.000755	0.000825	Klc1.3
Q6P502	0	0.000559	0.000397	0	0	0.000119	Cct3
P35465	0.00118318	0	0.000398	0	0.000255	0.000597	Pak1
P37285-2	0	0.000563	0.000399	0	0.000767	0.000839	Klc1.2
Q5XIM9	0	0.00057	0.000405	0.000618	0	0.000121	Cct2
P10719	0.00121673	0	0.000409	0.001874	0.000262	0.000246	Atp5f1b
P17425	0	0.000586	0.000416	0.000635	0.000533	0	Hmgcs1
P05370	0	0.000592	0.00042	0.000642	0.000538	0.000252	G6pdx
Q6P799	0	0.000596	0.000423	0	0	0.000254	Sars
P14408	0	0.000601	0.000427	0.000652	0	0.000256	Fh
P12785	0.000128	0.000365	0.000432	0.000264	0	0.000104	Fasn
P53042	0	0.000611	0.000434	0	0	0.00013	Ppp5c
Q5FVJ0-2	0.000661	0	0.000445	0	0	0.000267	Rufy3.2
Q5FVJ0	0.000686	0	0.000462	0	0	0.000277	Rufy3
P14408-2	0	0.000653	0.000464	0.000708	0	0.000278	Fh.2
Q63622-4	0.000726	0.000344	0.000488	0.000745	0.000156	0.000513	Dlg2.4
O08875	0	0.000704	0.0005	0	0	0.00015	Dclk1
Q63622-2	0.000749	0.000355	0.000504	0.000769	0.000161	0.000529	Dlg2.2
Q63622	0.000755	0.000358	0.000508	0.000776	0.000163	0.000534	Dlg2
Q6AY84	0	0.000737	0.000523	0.000798	0	0.000314	Scrn1
P16086	0	0.000247	0.000525	0.000134	0.000112	5.26e-05	Sptan1
B2GV54	0.000789	0.000747	0.000531	0.00161984	0	0.000159	Nceh1
Q6AYH5	0	0.000759	0.000539	0	0	0.000162	Dctn2
P36506	0	0.000762	0.000541	0.000826	0.000346	0.000812	Map2k2
Q9ER34	0.00123779	0.00117279	0.000555	0.00127095	0.00142145	0.000749	Aco2
P30835	0.000413	0.000782	0.000555	0.000424	0	0.00025	Pfkl
P47858	0.000413	0	0.000555	0	0	0.000167	Pfkm
Q5FVI6	0	0.000798	0.000567	0	0	0.00034	Atp6v1c1
O35987	0.0017396	0	0.000585	0.000893	0.000375	0.000351	Nsfl1c
Q63622-3	0.000871	0.000413	0.000586	0.000894	0.000188	0.000615	Dlg2.3
P16638	0.000585	0.00166324	0.00059	0.000601	0.000126	0.000177	Acly
P16638-2	0.00059	0.00167696	0.000595	0.000606	0.000127	0.000179	Acly.2
P16036	0.000904	0	0.000608	0.000928	0	0.000182	Slc25a3
P59215	0.00272734	0.000861	0.000612	0	0.000392	0.000183	Gnao1
P59215-2	0.00272734	0.000861	0.000612	0	0.000392	0.000183	Gnao1.2
O35179	0	0.000866	0.000615	0	0	0.000554	Sh3gl2
P27791	0	0.000869	0.000617	0	0.000395	0	Prkaca
P12346	0.000461	0	0.00062	0.000473	0.00119133	0.001675	Tf
Q62952-2	0.000471	0.000446	0.000634	0.000968	0	0.000285	Dpysl3.2
Q9Z254	0	0.000916	0.00065	0	0.000416	0.000585	Gipc1
Q3B8Q0	0	0.000935	0.000664	0	0	0.000598	Mapre2
P07824	0.000996	0	0.00067	0	0.000429	0.000603	Arg1
Q2PQA9	0	0.000633	0.000674	0	0.000144	0.000135	Kif5b
Q62910	0.000613	0.000775	0.000688	0.00063	0.000352	8.25e-05	Synj1
O35331	0.00103149	0.000977	0.000694	0.00105913	0.000888	0.00124909	Pdxk
Q62910-4	0.00062	0.000783	0.000695	0.000636	0.000356	8.34e-05	Synj1.4
Q9Z1N4	0.00104489	0.00099	0.000703	0	0	0.000211	Bpnt1
Q63622-5	0.00106213	0.000503	0.000714	0.00109059	0.000229	0.00075	Dlg2.5
Q05962	0.00215991	0.00102324	0.000726	0.00332666	0.000465	0.000436	Slc25a4
Q9QZA2	0.000369	0.000349	0.000744	0	0	0.000223	Pdcd6ip
Q62952	0.000565	0.000535	0.00076	0.00115947	0	0.000342	Dpysl3
O08557	0.00112921	0.00213984	0.00076	0.00115947	0.000973	0.00205114	Ddah1
Q9Z2L0	0.00227439	0.00107748	0.000765	0.00233532	0	0.00023	Vdac1
Q9JHU0	0.000571	0.000541	0.000768	0.0011718	0.000491	0.000461	Dpysl5
B0BNE5	0	0.0010813	0.000768	0	0	0.000691	Esd
Q5XIT1	0.00343586	0.0021703	0.00077	0	0.00147963	0.000925	Mapre3
O88600	0.00114938	0.00108902	0.000773	0.000787	0.000165	0.000619	Hspa4
P11442	0.000384	0.000728	0.000775	0.000789	0	7.76e-05	Cltc
P28480	0.000579	0	0.000779	0	0	0.000117	Tcp1
P69682	0	0.00110082	0.000782	0.00119295	0.00100066	0.000703	Necap1
Q62829	0	0.00112105	0.000796	0	0.000255	0.000478	Pak3
Q5M7W5	0.00121788	0.00144242	0.000819	0.000625	0.000131	6.15e-05	Map4
Q62910-2	0.000738	0.000932	0.000828	0.000758	0.000424	9.93e-05	Synj1.2
Q62910-5	0.000747	0.000944	0.000838	0.000767	0.000429	0.000101	Synj1.5
Q566Q8	0.00128217	0.00121485	0.000862	0.00131653	0.000552	0	Bles03
P85845	0.000653	0	0.000878	0	0.000281	0.000264	Fscn1
P97536	0.000262	0.000744	0.00088	0.000537	0.000225	0.000422	Cand1
Q5M7W5-2	0.00130957	0.001551	0.000881	0.000672	0.000141	6.61e-05	Map4.2
Q9Z269	0	0.00250968	0.000891	0	0	0.00106918	Vapb
P50475	0.000332	0.000945	0.000895	0.000341	0.00043	0.0011407	Aars
P85968	0.000666	0.000631	0.000896	0	0.000574	0.000538	Pgd
P18421	0	0.00127053	0.000902	0.00137687	0	0.000271	Psmb1
Q6RJR6-2	0.00135791	0.00257322	0.000913	0.0013943	0.00116955	0	Rtn3.2
Q62910-3	0.000822	0.00103893	0.000922	0.000844	0	0.000111	Synj1.3
Q9JK11	0.0013836	0.00104876	0.000931	0.000284	0.000119	0.000558	Rtn4
Q62910-6	0.000834	0.00105329	0.000935	0.000856	0	0.000112	Synj1.6
Q9QYL8	0	0.00132003	0.000937	0	0.0006	0.000281	Lypla2
P05708	0.000701	0.000996	0.000943	0.00072	0.000151	0.000354	Hk1
Q9QVC8	0.00140535	0.00266311	0.000945	0.000722	0	0.000709	Fkbp4
P62824	0.00283547	0.00402987	0.000954	0.00291144	0.00183161	0.000858	Rab3c
P22062	0.00283547	0.00134329	0.000954	0.00145572	0	0.000286	Pcmt1
P07895	0.00144967	0.00137354	0.000975	0	0	0.000293	Sod2
Q9Z0W5	0.00145953	0.000691	0.000982	0.000749	0	0.000884	Pacsin1
P63012	0.00292569	0.00415809	0.000984	0.00300407	0.00188989	0.000886	Rab3a
Q63942	0.00293905	0.00417708	0.000989	0.00301779	0.00189851	0.00089	Rab3d
P61107	0.00299373	0.00425479	0.0010069	0.00307394	0.00193384	0.000906	Rab14
P14881	0	0.00141826	0.0010069	0.00153697	0	0.000604	Cryba1
Q5I0G4	0.00151566	0.000957	0.00101954	0.00155627	0.000653	0.0015295	Gars
P35280	0.00310943	0.00441922	0.00104581	0.00319273	0.00200857	0.000941	Rab8a
P70550	0.00310943	0.00441922	0.00104581	0.00319273	0.00200857	0.000941	Rab8b
P41562	0.000777	0.000737	0.00104581	0.000798	0	0.000314	Idh1
P35281	0.00321826	0.0045739	0.00108242	0.00330448	0.00207887	0.000974	Rab10
P35704	0.00325077	0.00154003	0.00109335	0.00333786	0	0.000328	Prdx2
P14881-2	0	0.00154003	0.00109335	0.00166893	0	0.000656	Cryba1.2
P70580	0.00165039	0	0.00111017	0.00169461	0	0.000666	Pgrmc1
Q9Z2G8	0	0.000782	0.00111017	0	0	0.000167	Nap1l1
P61589	0	0.00157993	0.00112167	0	0	0.000337	Rhoa
Q6RUV5	0	0.00317632	0.00112752	0.00172108	0.00216549	0.00169148	Rac1
P07335	0.00168937	0.00160066	0.0011364	0.00173464	0.00145503	0.00238672	Ckb
Q63692	0.000849	0.00160911	0.00114239	0	0	0.00102828	Cdc37
P12711	0.00172099	0.000815	0.00115766	0.0017671	0.000371	0.00191038	Adh5
Q6DGG0	0.0026094	0.00164825	0.00117018	0.000893	0.000375	0.000702	Ppid
P50503	0.00174905	0.00248581	0.00117654	0.000898	0.000377	0.000177	St13
Q6P7Q4	0.00174905	0.00165721	0.00117654	0	0	0.000706	Glo1
P61150-2	0.00177804	0.00168468	0.00119604	0	0.0015314	0	Fgf12.2
P15791	0	0.000572	0.00121848	0.00062	0.00026	0.000609	Camk2d
Q4KM49	0.00061	0.00115503	0.00123002	0.0012517	0	0.000615	Yars
Q5RJR2	0.00183901	0.000871	0.00123705	0.00188828	0	0.000186	Twf1
P15791-4	0	0.000588	0.00125135	0.000637	0.000267	0.000626	Camk2d
O08838	0	0.000893	0.00126784	0.000968	0	9.51e-05	Amph
P15791-6	0	0.000596	0.00126846	0.000645	0.000271	0.000634	Camk2d
Q07936-2	0.00188754	0.000894	0.0012697	0.00193811	0.000406	0	Anxa2.2
Q07936	0.00189868	0.000899	0.00127719	0.00194955	0.000409	0.000958	Anxa2
Q9EQS0	0.00190995	0.00180965	0.00128477	0.00196112	0.00123375	0.00192738	Taldo1
B0BN85	0	0.000908	0.00128859	0.000983	0	0.0015465	Sugt1
Q6BBI8	0	0.00182591	0.00129631	0	0.00165978	0.000778	Ufc1
P15791-7	0	0.000612	0.00130412	0.000664	0.000278	0.000652	Camk2d
Q7M0E3	0.00390092	0.00184804	0.00131202	0.00400543	0.00251985	0.00708577	Dstn
Q6PEC4	0.00197439	0.00187072	0.00132812	0.00202729	0	0.00159394	Skp1
P51635	0.00099	0	0.0013322	0.00101676	0.00170574	0.00199855	Akr1a1
Q9EPH8	0.000506	0.000959	0.00136153	0.00103914	0.000654	0.000511	Pabpc1
Q5GFD9	0.00304567	0	0.00136583	0.00104242	0	0.00041	Impact
P47860	0.00122523	0.00193481	0.00137363	0.000839	0.00123114	0.00115398	Pfkp
P62630	0.00208978	0.00198004	0.00140574	0.00143051	0.0003	0.00196827	Eef1a1
P19804	0	0.0020061	0.00142423	0.002174	0.000912	0.00128196	Nme2
Q05982	0	0.0020061	0.00142423	0.002174	0.000912	0	Nme1
Q5RKI0	0.000531	0.00201272	0.00142893	0.00109059	0.000457	0.000857	Wdr1
Q09073	0	0.00102324	0.00145291	0	0.000465	0	Slc25a5
P50399	0.00144641	0.00205568	0.00145944	0.00148516	0	0.00102173	Gdi2
P61078	0	0.00207433	0.00147268	0.00224795	0.000943	0.00132557	Ube2d3
B3GNI6-2	0	0.0014117	0.00150336	0.00152985	0	0.00015	Sept11.2
B3GNI6	0	0.00141497	0.00150684	0.0015334	0	0.000151	Sept11
B0BNA5	0.00226638	0	0.00152453	0	0	0.000915	Cotl1
B3GNI6-3	0	0.00143495	0.00152812	0.00155505	0	0.000153	Sept11.3
P97697	0.00116183	0.00110082	0.00156306	0.00238591	0.0005	0.000703	Impa1
P16446	0.00118755	0.00112519	0.00159766	0	0.000511	0	Pitpna
Q99MZ8	0.00367102	0.00115942	0.00164626	0.00251291	0.000527	0.00197575	Lasp1
O88794	0.00123305	0.0011683	0.00165888	0	0	0.000249	Pnpo
P62815	0.00314898	0.00179017	0.00169459	0.00258668	0	0.000636	Atp6v1b2
Q920Q0	0.00084	0.000796	0.00169569	0.000863	0	0.000509	Palm
P21575	0.00111745	0.0014117	0.00175392	0.00114739	0.00016	0.000677	Dnm1
P21575-5	0.00111745	0.0014117	0.00175392	0.00114739	0.00016	0.000677	Dnm1.5
P21575-4	0.0011279	0.00142489	0.00177031	0.00115811	0.000162	0.000683	Dnm1.4
P21575-8	0.0011279	0.00142489	0.00177031	0.00115811	0.000162	0.000683	Dnm1.8
P21575-2	0.00113452	0.00143326	0.00178071	0.00116492	0.000163	0.000687	Dnm1.2
P21575-6	0.00113452	0.00143326	0.00178071	0.00116492	0.000163	0.000687	Dnm1.6
P34058	0.000889	0.000842	0.00179406	0.000913	0.000191	0.000628	Hsp90ab1
Q6MG61	0.00133538	0.00253051	0.00179654	0.00137115	0	0.00134757	Clic1
P80254	0.00272734	0	0.00183461	0	0	0.0011009	Ddt
P60522	0.00275065	0	0.00185028	0.00282434	0	0.00222061	Gabarapl2
P21575-3	0.00118609	0.00149841	0.00186165	0.00121787	0.00017	0.000718	Dnm1.3
P21575-7	0.00118609	0.00149841	0.00186165	0.00121787	0.00017	0.000718	Dnm1.7
P48037	0.00143459	0.000906	0.00193001	0.000491	0.00102965	0.00212327	Anxa6
Q5XIF6	0.000718	0.00136128	0.00193289	0	0.000309	0.00115987	Tuba4a
P50398	0.00143994	0.00136432	0.00193721	0.00147851	0.00031	0.00305148	Gdi1
P62828	0.00148993	0.00282339	0.00200447	0.00458956	0.000642	0.000902	Ran
Q8K586	0.00148993	0.00282339	0.00200447	0.00458956	0.000642	0.000902	Rasl2-9
P01835	0.00303609	0	0.0020423	0.00311743	0	0.000613	NA
P01836	0.00303609	0	0.0020423	0.00311743	0	0.000613	NA
Q63598	0.00255418	0.00338807	0.00206175	0.0026226	0.00131992	0.0013403	Pls3
P04906	0.0015325	0.00290406	0.00206175	0	0.00066	0.00340229	Gstp1
P50137	0.00309945	0.00244724	0.00208491	0.00212166	0	0.000938	Tkt
P34926	0.0015082	0.00208854	0.00210708	0.000596	9.99e-05	0.00014	Map1a
P62697	0.00784941	0.00892468	0.00211203	0.00322388	0	0.00253475	Crybb2
Q64559	0.00253406	0.002401	0.00227279	0.00260195	0.00109127	0.000341	Acot7
P31044	0.00172099	0.00163062	0.00231533	0.0035342	0.028163	0.00798885	Pebp1
P15999	0.00174589	0.00220562	0.00234883	0.00298778	0.00150371	0.000705	Atp5f1a
P82995	0.00131716	0.00166399	0.00236271	0.000902	0.000189	0.000443	Hsp90aa1
Q62785	0	0.00336935	0.00239208	0.00365136	0	0.000359	Pdap1
P68370	0.00285433	0.00202834	0.00240004	0.00659431	0.000307	0.00360049	Tuba1a
Q6P9V9	0.00285433	0.00202834	0.00240004	0.00659431	0.000307	0.00360049	Tuba1b
Q68FR8	0.00286068	0.00203284	0.00240537	0.00660896	0.000308	0.00360849	Tuba3a
Q8R478	0.00122834	0.00116384	0.00247882	0.00126125	0.00105795	0	Wbp2
P11030	0	0.0035049	0.00248831	0.00379825	0	0.000747	Dbi
P07323	0.0022246	0.00281038	0.00249405	0.0022842	0.00510937	0.0034422	Eno2
Q63560	0.000676	0.0012812	0.00250138	0.00138844	0.000728	0.00143278	Map6
Q64559-1	0.00285644	0.00270645	0.00256193	0.00293297	0.0012301	0.000384	Acot7.1
P35565	0	0.0020638	0.0025641	0.00111827	0	0.00011	Canx
Q63610	0.00259537	0.00122954	0.00261875	0.0026649	0	0.000262	Tpm3
Q63610-2	0.00259537	0.00122954	0.00261875	0.0026649	0	0.000262	Tpm3.2
Q63610-3	0.00260588	0.00123452	0.00262935	0.00267569	0	0.000263	Tpm3.3
P54690	0.00391516	0.00296766	0.00263362	0.00241203	0.00303485	0.00300269	Bcat1
P68511	0.00392471	0.00123954	0.00264004	0.00268657	0	0.00501668	Ywhah
P63004	0.000785	0.00297489	0.00264004	0.00161194	0.000338	0.000634	Pafah1b1
P21807	0.000688	0.00260621	0.00277543	0	0	0.000139	Prph
P62632	0.00347544	0.00461012	0.0028054	0.00285484	0.00119733	0.0043489	Eef1a2
Q3T1J1	0	0.00198004	0.00281147	0.00214577	0.00179989	0.000844	Eif5a
Q6AYK6	0.00281071	0.00399467	0.00283603	0	0.00242081	0.00198546	Cacybp
Q9EQX9	0.00211728	0.00601829	0.00284847	0.002174	0.0118532	0.00427322	Ube2n
Q9QUL6	0.00475818	0.00245909	0.00290972	0.0026649	0.000186	0.00209525	Nsf
Q9R063	0.00302184	0.00143158	0.00304906	0.0031028	0.000651	0.00243954	Prdx5
Q4KMA2	0.00155097	0.00146953	0.00312988	0.00159252	0	0.00109559	Rad23b
Q5XI32	0.00354955	0.00448421	0.00318358	0.00121488	0	0.00167158	Capzb
O35814	0.00237073	0.00336935	0.00318944	0.00243424	0.000766	0.0013158	Stip1
P12839	0.00152164	0.00468563	0.00332658	0.000391	0.000328	0.000154	Nefm
P39069	0.00331779	0.00157179	0.00334768	0.00170334	0.000714	0.00535694	Ak1
P62749	0.00666997	0.00315986	0.00336503	0.0051365	0.00430855	0.00706741	Hpcal1
P47942	0.00393843	0.00213235	0.00340621	0.00519936	0.00145376	0.00158976	Dpysl2
O88767	0.00340557	0.0048401	0.00343624	0.0034968	0.00879946	0.0250876	Park7
P62738	0.0034146	0.00161765	0.00344536	0.0043826	0.00183808	0.00172289	Acta2
P68035	0.0034146	0.00161765	0.00344536	0.0043826	0.00183808	0.00172289	Actc1
P68136	0.0034146	0.00161765	0.00344536	0.0043826	0.00183808	0.00172289	Acta1
P63269	0.00342368	0.00162195	0.00345452	0.00439426	0.00184297	0.00172747	Actg2
P60711	0.00343281	0.00162627	0.00346373	0.00440598	0.00184789	0.00173208	Actb
P63259	0.00343281	0.00162627	0.00346373	0.00440598	0.00184789	0.00173208	Actg1
Q6P6V0	0.00634424	0.00382524	0.00349167	0.00355321	0.00322884	0.007799	Gpi
P00507	0.00523903	0.00354566	0.00352415	0.00614787	0.000322	0.00105737	Got2
P13221	0.00701316	0.00221496	0.00366921	0.00640093	0.00503359	0.00314542	Got1
P15205	0.00248666	0.00545619	0.00396167	0.00268766	0.000282	0.000528	Map1b
Q9R063-2	0.00397316	0.00188226	0.00400895	0.00407961	0.000856	0.00320755	Prdx5.2
Q62658	0.00297987	0.00282339	0.00400895	0.0030597	0.0128326	0.00541274	Fkbp1a
P62898	0	0.00290406	0.00412349	0.00944138	0.00131992	0.0018558	Cycs
P11232	0.00306501	0.00290406	0.00412349	0.00314713	0.00263984	0.00371159	Txn
Q5XI73	0.00157758	0.00448421	0.00424477	0.00323969	0.000679	0.00318396	Arhgdia
P62260	0.00504825	0.00358737	0.00424477	0.00259175	0.000543	0.000509	Ywhae
P48500	0.00516989	0.00612302	0.00434705	0.0066355	0.00389615	0.0117385	Tpi1
P37805	0.00323443	0.00153229	0.00435142	0.00166054	0.000696	0.000979	Tagln3
P62161	0.0107995	0.00613946	0.00435872	0.00665332	0.00372058	0.0222322	Calm
P19527	0.0047502	0.00393817	0.00439357	0.00061	0	0.00024	Nefl
P35213	0.00915765	0.00371862	0.00440007	0.00537314	0	0.00448861	Ywhab
P35213-2	0.00923271	0.0037491	0.00443613	0.00541718	0	0.0045254	Ywhab.2
P84076	0	0.00315986	0.0044867	0	0	0.00437506	Hpca
P62762	0.00505486	0.00319295	0.00453368	0.00519029	0.00798171	0.014963	Vsnl1
Q9EPC6	0.00229876	0	0.00463893	0.00236034	0.00099	0.0018558	Pfn2
P23565	0	0.00362289	0.00471548	0.000654	0	0.000257	Ina
Q63429	0.00635706	0.00527034	0.005078	0.00611941	0.00872613	0.00200472	Ubc
P68255	0.00394073	0.00497839	0.00530163	0.0040463	0.00509112	0.00371159	Ywhaq
P62775	0.00272734	0.00775237	0.00550381	0.00280041	0.0011745	0.00330269	Mtpn
Q6PCU2	0.00284802	0.0040477	0.00574735	0.00292432	0.000613	0.000287	Atp6v1e1
Q5FVI4	0.00431981	0.00613946	0.00581163	0.00887109	0	0.000872	Cend1
O88989	0.0057813	0.00912954	0.00583338	0.00593619	0.00456439	0.0101124	Mdh1
P42123	0.00289065	0.00273886	0.00583338	0.00197873	0.00124483	0.00388939	Ldhb
P02625	0.00585138	0.00554412	0.00590409	0.00901222	0	0.00413336	Pvalb
P63018	0.00498183	0.00566427	0.00603204	0.00613835	0.00193084	0.00402185	Hspa8
P19332-8	0.00415259	0.00668871	0.00614533	0.00426385	0.00125179	0.00150858	Mapt2.8
P19332	0.0042796	0.00689329	0.00633329	0.00439426	0.00129008	0.00155472	Mapt
Q9WUC4	0	0.00448421	0.00636716	0.00485953	0.00611433	0.00382076	Atox1
P04636	0.00571289	0.00451075	0.00640483	0.00782126	0.00369031	0.00326686	Mdh2
P55053	0.00476779	0.00451743	0.00641432	0.00244776	0	0.00721699	Fabp5
P25113	0.00760219	0.00600249	0.00681837	0.00390293	0.00491073	0.010996	Pgam1
P62959	0.00510835	0.0048401	0.00687249	0.00524521	0.0109993	0.00721699	Hint1
P19332-2	0.00469134	0.00755649	0.00694261	0.00481703	0.0014142	0.0017043	Mapt.2
Reverse_sp|P23693|TNNI3_RAT	0.00457572	0.0057806	0.00718191	0.0125288	0.0262733	0	Reverse Tnni3
Q78P75	0.0180801	0.00342614	0.00729719	0.0074258	0.00778604	0.0240836	Dynll2
P11980	0.0121215	0.00746524	0.00733842	0.00933469	0.00495902	0.0146786	Pkm
P11980-2	0.0121215	0.00746524	0.00733842	0.00933469	0.00495902	0.0146786	Pkm.2
Q00981	0.00577266	0.0082043	0.00776622	0.0103728	0.00186446	0.0212626	Uchl1
P04642	0.0087242	0.010103	0.00847676	0.0109486	0.00834889	0.00860821	Ldha
P26772	0.00315516	0	0.00848954	0.0129587	0	0.00382076	Hspe1
P47728	0.0071253	0.00450076	0.00878715	0.00609683	0.038867	0.0119839	Calb2
P04764	0.0177968	0.00913374	0.00997619	0.0121824	0.0418329	0.0179593	Eno1
P16884	0.00510358	0.00910228	0.0100972	0.00554857	0.000905	0.00290834	Nefh
P09117	0.0132986	0.00756016	0.0101383	0.0136549	0.0236713	0.0329238	Aldoc
P63102	0.00919503	0.00871219	0.0114869	0.0134877	0.00678816	0.00662784	Ywhaz
P13668	0.0172792	0.0204649	0.0116233	0.00887109	0.00372058	0.00392333	Stmn1
P05065	0.0176827	0.0175919	0.0124894	0.015433	0.0296982	0.0660235	Aldoa
Q05175	0.0234055	0.0110882	0.0127922	0.0210285	0.00125992	0	Basp1
P02770	0.0201141	0.00952895	0.0135302	0.016305	0.0234785	0.0164519	Alb
P63055	0	0.0147545	0.0139667	0.00532981	0	0.00209525	Pcp4
P16617	0.0169788	0.0116998	0.0140169	0.0150564	0.0172824	0.0166666	Pgk1
P0CG51	0.0168827	0.0139966	0.0141956	0.0151681	0.0231743	0.00468513	Ubb
P37377-2	0.0129594	0.0143254	0.0145291	0.0133066	0.0158125	0.0261555	Snca.2
P37377	0.0137925	0.0152463	0.0154631	0.0141621	0.016829	0.0278369	Snca
P04797	0.0231947	0.0201453	0.0182028	0.0208391	0.220581	0.0563705	Gapdh
Q63754	0.0187928	0.0244832	0.0205422	0.0192962	0.0101162	0.0312912	Sncb
P45592	0.0155097	0.0128583	0.0208659	0.0119439	0.0183676	0.048519	Cfl1
Q5PPN5	0.0237712	0.0363833	0.0246004	0.0262856	0.0165365	0.0214049	Tppp3
P62982	0.0268188	0.0273652	0.0263666	0.0275373	0.0444204	0.00874366	Rps27a
P62986	0.0326854	0.0333513	0.0321342	0.0335611	0.0541373	0.0106563	Uba52
Q63544	0.0470965	0.0371862	0.0475207	0.0429851	0.0169014	0.0327405	Sncg
P10111	0.0745694	0.0204524	0.0501608	0.0523881	0.0811268	0.0550515	Ppia
contaminant_UBIQUITIN08	0.0550492	0.0561707	0.0541208	0.056524	0.0911787	0.0179475	Contaminant
P62329	0.0292569	0.0693015	0.0590409	0.0150204	0	0.0014762	Tmsb4x
