# Supplementary material for: Quantitative transportomics identifies Kif5a as a major regulator of neurodegeneration
Source: eLife. 2022 Mar 8;11:e68148. doi: 10.7554/eLife.68148 (PMC8947766; doi:10.7554/eLife.68148)
Supplement: Figure 2—figure supplement 1—source data 1. [file elife-68148-fig2-figsupp1-data1.xlsx]

## Sheet: Supplementary Figure 2- source 
Legend: Proteomic quantification of changes in newly synthesized proteins 3 weeks after glaucoma from Supplementary Figure 2b.
Protein Name	UniProt	Normalized replicate 1 ratio	Normalized replicate 2 ratio	Mean	One sample t-test p-value	Significant
Drap1	A0JPP1	0.548309	0.518199	0.448695	0.0179686	Significant increase
Shtn1	A0MZ67	0.604836	-0.847633	-0.0888956	0.894557	Not significant
Prpf6	A1A5S1	0.584035	-0.501642	0.0443573	0.951779	Not significant
Tollip	A2RUW1	-2.43281	-2.31856	-2.06799	0.0153047	Significant decrease
Hnrnpa2b1	A7VJC2	0.664918	0.344548	0.429791	0.195641	Not significant
Hnrnpa2b1	A7VJC2-2	0.664918	0.344548	0.429791	0.195641	Not significant
Pfdn2	B0BN18	-0.30701	-0.354396	-0.297572	0.045532	Significant decrease
Polr2e	B0BNE2	-0.400156	0.558799	0.0368488	0.895628	Not significant
Cisd1	B0K020	0.657618	0.348173	0.427987	0.190013	Not significant
Derpc	B2RYL1	-0.247217	-0.0261015	-0.135197	0.433033	Not significant
Fahd2	B2RYW9	0.178955	0.284904	0.185606	0.142956	Not significant
Septin11	B3GNI6	-0.574776	-0.416715	-0.444262	0.100641	Not significant
Septin11	B3GNI6-2	-0.574776	-0.416715	-0.444262	0.100641	Not significant
Septin11	B3GNI6-3	-0.574776	-0.416715	-0.444262	0.100641	Not significant
#N/A	contaminant_GR78_HUMAN	-0.0359398	0.825667	0.311458	0.527693	Not significant
#N/A	contaminant_GR78_MESAU	-0.0359398	0.825667	0.311458	0.527693	Not significant
#N/A	contaminant_GR78_MOUSE	-0.0359398	0.825667	0.311458	0.527693	Not significant
#N/A	contaminant_GR78_RAT	-0.0359398	0.825667	0.311458	0.527693	Not significant
#N/A	contaminant_UBIQUITIN05	-1.59064	-2.38733	-1.71579	0.125834	Not significant
#N/A	contaminant_UBIQUITIN07	0.208538	-0.639599	-0.182199	0.700648	Not significant
Gtpbp1	D2XV59	0.497884	0.416614	0.384026	0.056427	Not significant
Atp5mpl	D3Z9R8	0.428283	-0.203895	0.0967389	0.782866	Not significant
Atp5mf	D3ZAF6	0.040098	-0.402324	-0.160484	0.56324	Not significant
Macf1	D3ZHV2	0.422188	0.606122	0.427955	0.11268	Not significant
Impdh1	D3ZLZ7	-0.767213	-1.23212	-0.867413	0.14545	Not significant
Itpa	D3ZW55	0.393662	0.233253	0.261331	0.159471	Not significant
Copg2	D4ABY2	0.403816	-1.58121	-0.482187	0.65918	Not significant
Rbmxl1	D4AE41	1.04051	2.3135	1.41131	0.230933	Not significant
Impdh2	E9PU28	-1.79706	-0.812866	-1.15991	0.22957	Not significant
Snrnp200	F1LNJ2	-1.91611	-0.14579	-0.938672	0.451655	Not significant
Stx12	G3V7P1	1.02542	0.633226	0.711716	0.147818	Not significant
Mphosph8	G3V8T1	-0.227122	-0.183276	-0.190919	0.0677581	Not significant
Ddah1	O08557	0.523944	-0.244833	0.123086	0.778291	Not significant
Nup50	O08587	-2.28412	-0.0728568	-1.07489	0.479701	Not significant
Trim28	O08629	-0.179328	-0.459184	-0.28308	0.262972	Not significant
Kdr	O08775	-2.95716	3.37304	0.0417215	0.958236	Not significant
Slc7a3	O08812	-1.15653	-1.82037	-1.28587	0.13968	Not significant
Cdc5l	O08837	0.0332785	-0.212345	-0.0852371	0.598965	Not significant
Bin1	O08839	-0.00058457	0.658738	0.258609	0.500565	Not significant
Bin1	O08839-2	-0.00058457	0.658738	0.258609	0.500565	Not significant
Bin1	O08839-5	-0.00058457	0.658738	0.258609	0.500565	Not significant
Bin1	O08839-6	-0.00058457	0.658738	0.258609	0.500565	Not significant
Madd	O08873	-0.626014	-0.535233	-0.516281	0.0496672	Significant decrease
Copb2	O35142	0.745095	0.11144	0.36991	0.405485	Not significant
Sh3gl2	O35179	0.584243	0.0985534	0.291912	0.393613	Not significant
Dnm1l	O35303	-0.351597	0.976162	0.23087	0.720091	Not significant
Dnm1l	O35303-2	-0.351597	0.976162	0.23087	0.720091	Not significant
Dnm1l	O35303-3	-0.351597	0.976162	0.23087	0.720091	Not significant
Dnm1l	O35303-4	-0.351597	0.976162	0.23087	0.720091	Not significant
Dnm1l	O35303-5	-0.351597	0.976162	0.23087	0.720091	Not significant
Dnm1l	O35303-6	-0.351597	0.976162	0.23087	0.720091	Not significant
Pdxk	O35331	-1.01861	-0.0582837	-0.497036	0.463613	Not significant
Atic	O35567	-0.812684	0.325132	-0.245902	0.742277	Not significant
Msn	O35763	0.227213	1.02999	0.514612	0.361777	Not significant
Stip1	O35814	-0.380732	-0.197206	-0.266075	0.19575	Not significant
Coro7	O35828	0.181451	-2.58879	-0.998092	0.544549	Not significant
Hagh	O35952	-1.00052	-0.583272	-0.705317	0.163991	Not significant
Hagh	O35952-2	-1.00052	-0.583272	-0.705317	0.163991	Not significant
Atp6ap1	O54715	0.221488	-0.269715	-0.0238441	0.937696	Not significant
Smarcd2	O54772	0.410992	-0.128691	0.119932	0.693183	Not significant
Sort1	O54861	-0.833455	-1.10544	-0.845113	0.0887246	Not significant
Exoc8	O54924	0.0580313	-0.0509365	-0.00750313	0.958608	Not significant
Hsd17b10	O70351	1.11203	-0.41647	0.318062	0.728128	Not significant
Sgta	O70593	0.676463	0.0927841	0.331205	0.413222	Not significant
Safb	O88453	0.325608	0.470483	0.328389	0.1146	Not significant
Pacs1	O88588	0.467278	1.13799	0.667618	0.251956	Not significant
Pacs2	O88588-2	0.467278	1.13799	0.667618	0.251956	Not significant
Hspa4	O88600	0.23976	0.0192105	0.103537	0.4491	Not significant
Kif1b	O88658	-0.0953945	-0.342434	-0.197017	0.327037	Not significant
Kif1b	O88658-2	-0.0953945	-0.342434	-0.197017	0.327037	Not significant
Psmd1	O88761	-0.768201	0.596632	-0.113862	0.92039	Not significant
Park7	O88767	-0.690703	-0.6648	-0.598932	0.0121643	Significant decrease
Mdh1	O88989	0.434865	-0.0482891	0.163869	0.570404	Not significant
Por	P00388	0.570803	0.607362	0.495621	0.0197486	Significant increase
Mtco2	P00406	0.191371	-0.572048	-0.162106	0.705521	Not significant
Got2	P00507	-0.0527426	-0.926026	-0.418359	0.46378	Not significant
C3	P01026	-0.564013	0.891959	0.100169	0.85896	Not significant
Apoe	P02650	-2.99284	-0.715401	-1.66007	0.350627	Not significant
Rbp1	P02696	0.207561	-0.431059	-0.0966598	0.785683	Not significant
Hnrnpa1	P04256	0.800321	0.597622	0.595318	0.0916697	Not significant
Mdh2	P04636	-0.389027	-0.416307	-0.360159	0.0215562	Significant decrease
Ldha	P04642	-0.20688	0.133353	-0.0512265	0.864506	Not significant
Rps17	P04644	0.493638	0.0215822	0.219235	0.472184	Not significant
Eno1	P04764	0.00134535	-0.18978	-0.0903633	0.504513	Not significant
P4hb	P04785	-0.271149	0.987503	0.271899	0.670599	Not significant
Gapdh	P04797	-0.761914	-0.855531	-0.709749	0.0368064	Significant decrease
Gnai2	P04897	0.141652	0.239026	0.149834	0.159423	Not significant
Gsta3	P04904	-0.0823908	-1.17227	-0.533283	0.45533	Not significant
Gstm1	P04905	-1.43732	-1.20489	-1.15899	0.0558581	Not significant
Fn1	P04937	-2.15644	2.25086	-0.0591268	0.986362	Not significant
Fn1	P04937-2	-2.15644	2.25086	-0.0591268	0.986362	Not significant
Fn1	P04937-3	-2.15644	2.25086	-0.0591268	0.986362	Not significant
Fn1	P04937-4	-2.15644	2.25086	-0.0591268	0.986362	Not significant
Pcna	P04961	-1.05408	0.0403784	-0.472387	0.524375	Not significant
Aldoa	P05065	-1.07578	-1.82984	-1.25329	0.16165	Not significant
Eef2	P05197	0.190225	0.239928	0.172155	0.0732344	Not significant
G6pdx	P05370	-0.927558	-0.398504	-0.596166	0.24167	Not significant
Clu	P05371	-1.52755	-0.543866	-0.927221	0.282248	Not significant
Prkca	P05696	0.996295	-0.317008	0.306771	0.696115	Not significant
Hk1	P05708	0.588971	-0.166913	0.184597	0.675807	Not significant
Rps21	P05765	0.626971	0.792296	0.597251	0.0738247	Not significant
S100a4	P05942	-1.20886	0.994295	-0.149029	0.938193	Not significant
A2m	P06238	-4.46859	-2.06364	-2.8828	0.224578	Not significant
Atp1a1	P06685	0.0947482	-0.490704	-0.172228	0.621428	Not significant
Atp1a2	P06686	0.214238	0.168908	0.153725	0.0749693	Not significant
Atp1a3	P06687	0.641269	0.00742663	0.280109	0.492628	Not significant
Hspa5	P06761	-0.0359398	0.825667	0.311458	0.527693	Not significant
Hmox1	P06762	0.5438	3.94527	1.85964	0.4128	Not significant
Hp	P06866	0.88837	7.08652	3.31048	0.420607	Not significant
Hp	P06866-2	0.88837	7.08652	3.31048	0.420607	Not significant
B2m	P07151	0.585127	1.53736	0.885535	0.268477	Not significant
Calb1	P07171	0.0761387	-0.26925	-0.0893318	0.675443	Not significant
Scd1	P07308	-0.90331	-1.1343	-0.888578	0.0718623	Not significant
Eno2	P07323	0.848037	0.70104	0.659519	0.0602303	Not significant
Ckb	P07335	0.0811276	-0.466832	-0.168541	0.60954	Not significant
Syp	P07825	0.901012	0.0458783	0.413334	0.467612	Not significant
Acox1	P07872	-0.0177924	-0.198036	-0.102415	0.442957	Not significant
Acox1	P07872-2	-0.0177924	-0.198036	-0.102415	0.442957	Not significant
Akr1b1	P07943	-1.19787	-1.03241	-0.979672	0.0471434	Significant decrease
Camk2b	P08413	0.768377	0.293066	0.455315	0.26803	Not significant
Dlat	P08461	0.102089	0.0546072	0.0559212	0.187309	Not significant
Acadm	P08503	-0.356985	-0.76412	-0.489084	0.221764	Not significant
App	P08592	0.255739	0.506384	0.311619	0.202276	Not significant
App	P08592-2	0.255739	0.506384	0.311619	0.202276	Not significant
Ass1	P09034	-0.909567	0.266402	-0.313896	0.681386	Not significant
Aldoc	P09117	0.780832	-0.649145	0.0724689	0.941538	Not significant
Prkce	P09216	-2.20184	-3.44833	-2.42943	0.138232	Not significant
Prkar1a	P09456	0.13747	-0.322216	-0.0834559	0.756722	Not significant
Rab7a	P09527	-0.170767	0.224037	0.00248101	0.914618	Not significant
Glul	P09606	0.617585	0.566075	0.499738	0.0276864	Significant increase
Rpl5	P09895	-2.02388	-1.58477	-1.58066	0.0770865	Not significant
Syn1	P09951	1.0735	0.739534	0.777274	0.115968	Not significant
Syn1	P09951-2	1.0735	0.739534	0.777274	0.115968	Not significant
Slmap	P0C219	-0.605702	-1.44538	-0.882356	0.247371	Not significant
Sphkap	P0C6C0	0.256939	-0.394447	-0.0592516	0.867554	Not significant
Sgip1	P0DJJ3	0.362381	0.286266	0.269053	0.074364	Not significant
Ppia	P10111	0.307857	0.205674	0.211187	0.125042	Not significant
Scg2	P10362	-0.93044	-0.236283	-0.530585	0.341679	Not significant
Rab1b	P10536	0.389671	-0.000293407	0.163236	0.500479	Not significant
Atp5f1b	P10719	0.303026	0.213294	0.212146	0.109545	Not significant
Glud1	P10860	-1.78002	-1.45537	-1.41712	0.0636665	Not significant
Cox4i1	P10888	-0.494039	-1.38471	-0.806886	0.281828	Not significant
Cox5a	P11240	0.330472	0.618781	0.391731	0.187719	Not significant
Qdpr	P11348	-0.921636	-0.61599	-0.68316	0.124918	Not significant
Cltc	P11442	-0.0314762	0.168446	0.0425023	0.617604	Not significant
Crot	P11466	0.193088	0.446386	0.258572	0.240097	Not significant
Atp2b1	P11505	0.325786	-0.210334	0.0477682	0.864968	Not significant
Atp2b1	P11505-2	0.325786	-0.210334	0.0477682	0.864968	Not significant
Atp2b1	P11505-3	0.325786	-0.210334	0.0477682	0.864968	Not significant
Atp2b1	P11505-4	0.325786	-0.210334	0.0477682	0.864968	Not significant
Atp2b1	P11505-5	0.325786	-0.210334	0.0477682	0.864968	Not significant
Atp2b1	P11505-6	0.325786	-0.210334	0.0477682	0.864968	Not significant
Atp2a2	P11507	0.550507	0.600138	0.483472	0.0274426	Significant increase
Atp2a2	P11507-2	0.550507	0.600138	0.483472	0.0274426	Significant increase
Pdia3	P11598	-1.70774	-0.691677	-1.06958	0.255009	Not significant
Mt-atp8	P11608	0.675693	-0.0758168	0.261343	0.571135	Not significant
Camk2g	P11730	0.820308	0.316657	0.488508	0.26547	Not significant
Camk2g	P11730-2	0.820308	0.316657	0.488508	0.26547	Not significant
Camk2g	P11730-3	0.820308	0.316657	0.488508	0.26547	Not significant
Aldh2	P11884	-1.63203	-0.660241	-1.02241	0.255268	Not significant
Scp2	P11915	-0.674118	-0.603801	-0.566288	0.0349946	Significant decrease
Pkm	P11980	-0.637272	-0.942155	-0.689142	0.121396	Not significant
Pkm	P11980-2	-0.637272	-0.942155	-0.689142	0.121396	Not significant
Ivd	P12007	-0.240456	-0.512455	-0.332666	0.220699	Not significant
Cox5b	P12075	0.196264	0.349009	0.219858	0.173877	Not significant
Prkar2a	P12368	-0.389499	-1.02373	-0.610814	0.268553	Not significant
Rpl26	P12749	0.650014	0.263976	0.389837	0.254417	Not significant
Fasn	P12785	0.374207	0.0552961	0.179168	0.406603	Not significant
Nefm	P12839	2.25	0.592639	1.24833	0.336041	Not significant
Npm1	P13084	0.242334	0.523695	0.312699	0.224091	Not significant
Fgf2	P13109	-0.490064	-0.72956	-0.53497	0.123442	Not significant
Gls	P13264	0.717601	0.302905	0.436427	0.245723	Not significant
Acaa2	P13437	-1.79724	-0.120162	-0.87439	0.457499	Not significant
Ncam1	P13596	0.0919044	-0.183614	-0.0468997	0.795438	Not significant
Aldh1a7	P13601	0.248585	0.681823	0.38072	0.27743	Not significant
Cp	P13635	-1.97707	-1.02164	-1.32733	0.196361	Not significant
Atp1b2	P13638	0.089727	-0.518302	-0.185876	0.609128	Not significant
Stmn1	P13668	0.747177	0.16828	0.394287	0.358973	Not significant
Rlc-a	P13832	-0.88626	0.358342	-0.265457	0.744611	Not significant
Fh	P14408	-0.381714	0.33893	-0.0454697	0.962249	Not significant
Fh	P14408-2	-0.381714	0.33893	-0.0454697	0.962249	Not significant
Hspa2	P14659	-2.72674	-1.57057	-1.89241	0.167318	Not significant
Anxa5	P14668	-1.32009	-0.0490759	-0.629473	0.476344	Not significant
Cryba1	P14881	-0.0663481	0.228244	0.0513998	0.680095	Not significant
Cryba1	P14881-2	-0.0663481	0.228244	0.0513998	0.680095	Not significant
Pam	P14925	-1.45938	-0.614847	-0.925679	0.246155	Not significant
Pam	P14925-2	-1.45938	-0.614847	-0.925679	0.246155	Not significant
Pam	P14925-3	-1.45938	-0.614847	-0.925679	0.246155	Not significant
Pam	P14925-4	-1.45938	-0.614847	-0.925679	0.246155	Not significant
Pam	P14925-5	-1.45938	-0.614847	-0.925679	0.246155	Not significant
Pam	P14925-6	-1.45938	-0.614847	-0.925679	0.246155	Not significant
Pam	P14925-7	-1.45938	-0.614847	-0.925679	0.246155	Not significant
Cpe	P15087	0.185859	-0.116715	0.0231383	0.856975	Not significant
Map2	P15146	0.234103	1.27404	0.618349	0.384313	Not significant
Map2	P15146-2	0.234103	1.27404	0.618349	0.384313	Not significant
Map1b	P15205	-0.137267	0.331837	0.0620647	0.749698	Not significant
Kcnb1	P15387	1.02557	1.25947	0.969981	0.0649386	Not significant
Eno3	P15429	0.0305164	-0.0916817	-0.0367357	0.704557	Not significant
Camk2d	P15791	0.767359	0.0708526	0.363237	0.441385	Not significant
Camk2d	P15791-2	0.767359	0.0708526	0.363237	0.441385	Not significant
Camk2d	P15791-3	0.767359	0.0708526	0.363237	0.441385	Not significant
Camk2d	P15791-4	0.767359	0.0708526	0.363237	0.441385	Not significant
Camk2d	P15791-5	0.767359	0.0708526	0.363237	0.441385	Not significant
Camk2d	P15791-6	0.767359	0.0708526	0.363237	0.441385	Not significant
Camk2d	P15791-7	0.767359	0.0708526	0.363237	0.441385	Not significant
H1-4	P15865	0.59661	-0.0634924	0.230689	0.567496	Not significant
Sag	P15887	-3.50869	-0.0584631	-1.62231	0.489393	Not significant
Aplp2	P15943	-0.0436411	0.210105	0.0541817	0.630379	Not significant
Aplp3	P15943-3	-0.0436411	0.210105	0.0541817	0.630379	Not significant
Atp5f1a	P15999	-0.0595335	-1.10791	-0.496417	0.465824	Not significant
Slc25a3	P16036	-0.14115	-2.61227	-1.15355	0.465635	Not significant
Sptan1	P16086	0.979039	0.947316	0.820256	0.0104828	Significant increase
Pgk1	P16617	0.461664	0.661254	0.468524	0.111985	Not significant
Acly	P16638	0.439913	0.0447032	0.204491	0.435529	Not significant
Acly	P16638-2	0.454644	0.0447032	0.211148	0.437605	Not significant
Hmgcs1	P17425	1.7186	1.10896	1.22109	0.135189	Not significant
Prph2	P17438	-0.995896	-0.986635	-0.869534	0.00297374	Significant decrease
Rpl28	P17702	0.513238	1.08546	0.666732	0.218821	Not significant
Gad1	P18088	0.8865	-0.713898	0.0935196	0.931605	Not significant
Acsl1	P18163	-0.340198	0.129903	-0.112892	0.732212	Not significant
Mat2a	P18298	0.254045	0.518257	0.315749	0.209847	Not significant
Calr	P18418	0.560721	0.885444	0.605719	0.140615	Not significant
Psma1	P18420	-0.0420266	-0.508607	-0.241414	0.447515	Not significant
Psmb1	P18421	0.472904	0.395998	0.364238	0.0562002	Not significant
Ap2a2	P18484	-0.187	-0.355475	-0.243788	0.1917	Not significant
Myl12b	P18666	-0.88626	0.358342	-0.265457	0.744611	Not significant
Fth1	P19132	-3.23837	0.619062	-1.22081	0.620249	Not significant
Fth1	P19332-6	0.783675	0.72866	0.641824	0.0231482	Significant increase
Atp5pb	P19511	0.387486	0.0215822	0.171268	0.464578	Not significant
Nefl	P19527	3.17574	1.25878	1.9413	0.259755	Not significant
Nme2	P19804	-1.22354	0.331214	-0.429047	0.668301	Not significant
Rplp0	P19945	0.568497	0.167619	0.313273	0.317467	Not significant
Rpl21	P20280	-0.879801	-1.6037	-1.07149	0.180561	Not significant
Cntf	P20294	-1.34442	-1.54674	-1.25796	0.0444782	Significant decrease
Ppp3cb	P20651	-0.323513	-0.524671	-0.375233	0.148244	Not significant
Ednrb	P21451	-0.483217	-0.199131	-0.313179	0.251152	Not significant
Rpl3	P21531	0.236063	0.647401	0.36087	0.277406	Not significant
Rpl3	P21575-5	0.837034	-0.194301	0.285397	0.645207	Not significant
Rpl3	P21575-6	0.837034	-0.194301	0.285397	0.645207	Not significant
Rpl3	P21575-7	0.837034	-0.194301	0.285397	0.645207	Not significant
Rpl3	P21575-8	0.837034	-0.194301	0.285397	0.645207	Not significant
Syt1	P21707	0.640789	0.410264	0.445983	0.137452	Not significant
Sdhb	P21913	0.0478528	-0.972995	-0.392268	0.531284	Not significant
Ptgds	P22057	0.318766	-0.910628	-0.244136	0.714362	Not significant
Synpr	P22831	1.24752	-0.078057	0.518813	0.539781	Not significant
Copb1	P23514	0.210146	-0.898965	-0.288409	0.646194	Not significant
Hmox2	P23711	0.263266	0.452892	0.292966	0.164784	Not significant
Cryab	P23928	-2.26014	-0.676723	-1.31303	0.314794	Not significant
Slc6a1	P23978	0.820861	0.444323	0.541395	0.184153	Not significant
Sparcl1	P24054	0.737561	0.918795	0.699379	0.0693814	Not significant
Ctsd	P24268	-0.915228	-0.0927353	-0.464526	0.435714	Not significant
Ppib	P24368	-0.397745	0.376821	-0.0370913	0.982807	Not significant
Slc1a3	P24942	-0.324342	-1.19717	-0.652882	0.331568	Not significant
Pgam1	P25113	-1.46257	-0.424042	-0.848453	0.320351	Not significant
Atp6v0a1	P25286	0.780385	0.250407	0.443153	0.302331	Not significant
Atp6v0a1	P25286-2	0.780385	0.250407	0.443153	0.302331	Not significant
Ubtf	P25977	-0.146931	-1.85446	-0.843717	0.449665	Not significant
Ubtf	P25977-2	-0.146931	-1.85446	-0.843717	0.449665	Not significant
ifitm3	P26376	0.247596	1.11905	0.56054	0.361377	Not significant
Bsg	P26453	-0.135875	0.0231505	-0.0645778	0.607437	Not significant
Bsg	P26453-2	-0.135875	0.0231505	-0.0645778	0.607437	Not significant
Hspe1	P26772	0.149924	0.347925	0.198472	0.240982	Not significant
Hprt1	P27605	-0.914947	-0.132633	-0.480849	0.408352	Not significant
Hk2	P27881	0.558245	-0.425559	0.0640726	0.914654	Not significant
Dctn1	P28023	0.265381	0.26404	0.216058	0.00161176	Significant increase
Ssbp1	P28042	-0.663385	-0.268165	-0.423055	0.25544	Not significant
Psmb5	P28075	-0.137719	0.0556749	-0.0520016	0.744574	Not significant
Tcp1	P28480	-0.376258	-0.788292	-0.507759	0.216494	Not significant
Tcp1	P28572-1	0.724753	-0.898965	-0.0558726	0.931956	Not significant
Bdh1	P29147	0.81671	0.588357	0.598905	0.102567	Not significant
Atp5me	P29419	0.446707	-0.253449	0.0846325	0.828549	Not significant
Serpinh1	P29457	-3.08167	-1.49535	-2.02178	0.212393	Not significant
Plec	P30427	-1.2947	0.00641023	-0.595121	0.503152	Not significant
Plec	P30427-2	-1.2947	0.00641023	-0.595121	0.503152	Not significant
Plec	P30427-3	-1.2947	0.00641023	-0.595121	0.503152	Not significant
Plec	P30427-4	-1.2947	0.00641023	-0.595121	0.503152	Not significant
Pfkl	P30835	0.832505	0.090507	0.400778	0.43106	Not significant
Mif	P30904	0.492657	0.0514363	0.231101	0.433773	Not significant
Vim	P31000	-1.19404	0.0995025	-0.511256	0.552929	Not significant
Pebp1	P31044	-2.34381	-1.28926	-1.60339	0.179845	Not significant
Tagln	P31232	-1.07334	-0.422239	-0.671827	0.261399	Not significant
Ezr	P31977	-0.0317259	1.41242	0.55528	0.514297	Not significant
Uqcrc2	P32551	-2.42221	-1.9916	-1.92839	0.0619114	Not significant
Acsl6	P33124	-0.552376	-1.39367	-0.836941	0.25977	Not significant
Hsp90ab1	P34058	0.466173	0.687386	0.481336	0.120617	Not significant
Map1a	P34926	1.27176	0.219076	0.652275	0.3914	Not significant
Cox7a2	P35171	0.34514	0.115621	0.190905	0.294215	Not significant
Ywhab	P35213	0.121542	0.155226	0.106197	0.0771003	Not significant
Ywhab	P35213-2	0.121542	0.155226	0.106197	0.0771003	Not significant
Hpcal4	P35332	0.910517	0.688754	0.682687	0.0877176	Not significant
Cxcr2	P35407	1.92083	3.80839	2.42545	0.202612	Not significant
Rpl13a	P35427	0.462024	0.411959	0.365902	0.0364284	Significant increase
Atp5f1c	P35435	1.29437	0.256496	0.677919	0.375459	Not significant
Canx	P35565	-0.144511	-0.184703	-0.154178	0.077339	Not significant
Ralb	P36860	0.650492	0.857868	0.634914	0.08698	Not significant
Gpx4	P36970	-0.136929	-0.48525	-0.274668	0.32491	Not significant
Gpx4	P36970-2	-0.136929	-0.48525	-0.274668	0.32491	Not significant
Cnn3	P37397	-0.675309	-0.128728	-0.370953	0.380086	Not significant
Tagln3	P37805	0.983092	-0.0503638	0.410743	0.532586	Not significant
Dync1h1	P38650	-0.111642	-0.353797	-0.209043	0.305408	Not significant
Pgm1	P38652	-1.29634	-0.358595	-0.746353	0.328193	Not significant
Ssb	P38656	-0.137531	-0.56031	-0.305888	0.346768	Not significant
Pdia4	P38659	-0.767837	1.02984	0.0649166	0.907863	Not significant
Rpl36	P39032	0.632205	-0.0948075	0.233862	0.594763	Not significant
Rpl36	P39052-2	0.516418	0.339117	0.360449	0.130092	Not significant
Rpl36	P39052-4	0.516418	0.339117	0.360449	0.130092	Not significant
Ak1	P39069	0.380078	-0.0704766	0.129965	0.616721	Not significant
Rpl13	P41123	-0.415211	-0.391124	-0.361608	0.0190113	Significant decrease
Idh1	P41562	-2.3229	-0.422976	-1.23677	0.385334	Not significant
Ldhb	P42123	0.584789	-0.13588	0.195502	0.645344	Not significant
Ece1	P42893	-0.024569	2.89607	1.17023	0.505401	Not significant
Ece1	P42893-2	-0.024569	2.89607	1.17023	0.505401	Not significant
Ece1	P42893-3	-0.024569	2.89607	1.17023	0.505401	Not significant
Ece1	P42893-4	-0.024569	2.89607	1.17023	0.505401	Not significant
Matr3	P43244	0.885074	-0.55562	0.158133	0.856881	Not significant
H1-0	P43278	0.424589	0.597735	0.425582	0.106808	Not significant
Cfl1	P45592	0.456034	0.521254	0.408258	0.0424224	Significant increase
Acadvl	P45953	-0.164532	-0.601308	-0.334992	0.329968	Not significant
Vcp	P46462	-0.582237	0.318912	-0.144334	0.819012	Not significant
Cdk11b	P46892	0.734072	0.999653	0.73114	0.0967687	Not significant
Rph3a	P47709	0.31154	-0.121925	0.077782	0.737483	Not significant
Calb2	P47728	1.47174	1.02851	1.07637	0.111694	Not significant
Gfap	P47819	-1.44187	-0.389788	-0.824977	0.331917	Not significant
Gfap	P47819-2	-1.44187	-0.389788	-0.824977	0.331917	Not significant
Pfkm	P47858	0.257647	-0.273826	-0.00919981	0.980626	Not significant
Pfkp	P47860	0.479639	-0.0377606	0.188442	0.550016	Not significant
Aqp4	P47863	-0.82953	-0.27942	-0.502772	0.293159	Not significant
Aqp4	P47863-2	-0.82953	-0.27942	-0.502772	0.293159	Not significant
Dpysl2	P47942	0.974893	0.383157	0.585779	0.2616	Not significant
Psma7	P48004	0.0132684	-0.112063	-0.0529328	0.575027	Not significant
Psma7	P48004-2	0.0132684	-0.112063	-0.0529328	0.575027	Not significant
Anxa6	P48037	-0.67382	1.01	0.099217	0.874547	Not significant
Tpi1	P48500	-0.0871194	0.233092	0.0440122	0.727706	Not significant
Lmna	P48679	-0.704457	1.41967	0.25428	0.793235	Not significant
Hspa9	P48721	0.206772	0.400954	0.246023	0.196888	Not significant
Itgb1	P49134	-0.199868	0.945472	0.286779	0.632625	Not significant
Rps3a	P49242	0.146281	0.068283	0.0815287	0.221968	Not significant
Nup153	P49791	-1.40466	-1.18694	-1.13683	0.0533569	Not significant
Rgs9	P49805	-0.128738	0.262603	0.0373736	0.790176	Not significant
Rgs9	P49805-2	-0.128738	0.262603	0.0373736	0.790176	Not significant
Rgs10	P49806	-1.55004	-2.56613	-1.77116	0.154071	Not significant
Anp32a	P49911	-0.986909	-0.755046	-0.769988	0.0842418	Not significant
Tkt	P50137	0.217505	0.561953	0.317254	0.264899	Not significant
Gdi1	P50398	0.221645	0.322227	0.220285	0.116419	Not significant
Gdi2	P50399	0.233232	-0.174465	0.0207344	0.908863	Not significant
Atp6v1f	P50408	0.46075	-0.252563	0.0913436	0.819218	Not significant
Aars1	P50475	-0.0631553	-1.04357	-0.471529	0.46152	Not significant
St13	P50503	6.30569	0.17198	2.90755	0.482641	Not significant
Abat	P50554	-0.471918	-0.652171	-0.494862	0.101223	Not significant
Rpl4	P50878	0.692471	-0.170275	0.22998	0.653496	Not significant
Rab4b	P51146	0.254754	0.00441137	0.10421	0.488977	Not significant
Rho	P51489	0.739099	0.496807	0.526088	0.123243	Not significant
Akr1a1	P51635	-0.877487	-0.974196	-0.810899	0.0332189	Significant decrease
Aldh1a1	P51647	0.248585	0.681823	0.38072	0.27743	Not significant
Gucy2e	P51840	-1.21278	-0.983319	-0.966172	0.066278	Not significant
Kpnb1	P52296	0.872103	-3.86957	-1.21407	0.64112	Not significant
Ap1b1	P52303	-0.21474	0.480948	0.0885355	0.767338	Not significant
Ap1b1	P52303-2	-0.21474	0.480948	0.0885355	0.767338	Not significant
Stat3	P52631	0.667761	0.328534	0.424473	0.208924	Not significant
Pdlim1	P52944	-4.25965	-2.58591	-3.00372	0.152658	Not significant
Pygb	P53534	0.271802	0.0781711	0.142325	0.321718	Not significant
Hap1	P54256	0.504479	-0.0959715	0.175667	0.61968	Not significant
Hap1	P54256-2	0.504479	-0.0959715	0.175667	0.61968	Not significant
Gnb1	P54311	-0.524803	-0.0180613	-0.257316	0.478099	Not significant
Bcat1	P54690	1.01682	0.424727	0.621863	0.248107	Not significant
Napa	P54921	1.08561	1.27851	1.00496	0.0518298	Not significant
Fabp5	P55053	-0.335815	0.843005	0.183101	0.741335	Not significant
Tmbim6	P55062	-0.495668	-0.0343431	-0.250863	0.455961	Not significant
Adar	P55266	0.0664277	0.336723	0.156124	0.376002	Not significant
Ogt	P56558	0.224305	-1.2438	-0.424187	0.613587	Not significant
Scamp1	P56603	0.22393	-0.638713	-0.174879	0.714672	Not significant
Reln	P58751	1.77647	0.80843	1.12333	0.22812	Not significant
Reln	P58751-2	1.77647	0.80843	1.12333	0.22812	Not significant
Reln	P58751-3	1.77647	0.80843	1.12333	0.22812	Not significant
Gnao1	P59215	1.63518	-0.32194	0.593434	0.623757	Not significant
Gnao1	P59215-2	1.63518	-0.32194	0.593434	0.623757	Not significant
Gabarapl2	P60522	-0.356732	-0.596723	-0.419952	0.15698	Not significant
Actb	P60711	-0.388213	-0.227835	-0.282084	0.162135	Not significant
Ensa	P60841	-0.132979	-1.0585	-0.509234	0.420438	Not significant
Ensa	P60841-2	-0.132979	-1.0585	-0.509234	0.420438	Not significant
Snap25	P60881	0.956265	0.84316	0.767021	0.0399627	Significant increase
Snap25	P60881-2	0.89984	1.01309	0.811586	0.0376448	Significant increase
Arf3	P61206	-0.0116394	0.258864	0.0887454	0.528605	Not significant
Stx1b	P61265	1.1042	0.722099	0.783956	0.131301	Not significant
Rpl27	P61354	-1.4985	-0.0207152	-0.698395	0.4912	Not significant
Rhoa	P61589	-0.156948	-0.0724239	-0.113506	0.224766	Not significant
Rhoa	P61765-2	0.869229	0.268697	0.49084	0.309139	Not significant
Hnrnpk	P61980	-0.80811	-0.588096	-0.62036	0.0995003	Not significant
Rps7	P62083	-0.412737	-0.726448	-0.498744	0.171073	Not significant
Calm1	P62161	1.35261	1.18756	1.08812	0.0413067	Significant increase
Psmc5	P62198	0.589905	0.705178	0.544583	0.0565155	Not significant
Rps15a	P62246	0.2192	0.247325	0.188298	0.0383331	Significant increase
Ywhae	P62260	0.178379	0.190797	0.146546	0.0214067	Significant increase
Rps18	P62271	0.459475	0.566848	0.428611	0.0663611	Not significant
Tsc22d1	P62501	-0.387871	-0.746233	-0.495665	0.194843	Not significant
Esrrg	P62510	-0.226885	-1.61119	-0.779545	0.410938	Not significant
Esrrg	P62510-2	-0.226885	-1.61119	-0.779545	0.410938	Not significant
Eef1a1	P62630	1.31363	1.04662	1.01239	0.0717134	Not significant
Ppp2cb	P62716	-0.737682	-0.767739	-0.662602	0.0127091	Significant decrease
Acta2	P62738	-0.426447	0.401319	-0.0399605	0.98068	Not significant
Rpl23a	P62752	0.577339	0.811048	0.582555	0.106168	Not significant
Vsnl1	P62762	2.12053	0.778637	1.26652	0.27597	Not significant
H4c2	P62804	-2.42391	-1.9633	-1.91749	0.066595	Not significant
Gabra1	P62813	2.203	1.15936	1.46076	0.191598	Not significant
Atp6v1b2	P62815	1.11825	0.44534	0.676198	0.258726	Not significant
Rpl23	P62832	0.0825074	-0.280392	-0.0910479	0.682188	Not significant
Rps15	P62845	0.266789	0.0414862	0.124935	0.401791	Not significant
Rps24	P62850	0.100657	0.719313	0.329333	0.41149	Not significant
Rps24	P62850-2	0.100657	0.719313	0.329333	0.41149	Not significant
Rps24	P62850-3	0.100657	0.719313	0.329333	0.41149	Not significant
Rps28	P62859	0.43924	0.531181	0.404762	0.0601355	Not significant
Elob	P62870	-0.319581	-0.740526	-0.462454	0.240633	Not significant
Gnb5	P62882	0.17405	0.29455	0.187367	0.160234	Not significant
Rps3	P62909	0.597566	1.2148	0.758162	0.208969	Not significant
Rpl32	P62912	0.4361	0.0802537	0.217426	0.384142	Not significant
Gtf2b	P62916	0.307917	0.447491	0.310916	0.116314	Not significant
Ap2b1	P62944	0.0163335	0.554838	0.223416	0.481264	Not significant
Ap2b1	P62944-2	0.0163335	0.554838	0.223416	0.481264	Not significant
Pfn1	P62963	-1.43864	0.250278	-0.559617	0.609655	Not significant
Crabp1	P62966	0.865045	0.143811	0.437459	0.395123	Not significant
Pafah1b1	P63004	0.170516	0.234834	0.161149	0.100179	Not significant
Rab3a	P63012	1.25983	1.44014	1.15033	0.0424518	Significant increase
Hspa8	P63018	0.0512402	-0.0921903	-0.0275808	0.822952	Not significant
Tpt1	P63029	1.4044	2.70032	1.73523	0.194685	Not significant
Dnaja1	P63036	0.661097	0.183148	0.361519	0.327948	Not significant
Hspd1	P63039	0.208885	0.259727	0.188751	0.0688005	Not significant
Cplx1	P63041	1.72549	0.996278	1.17774	0.166649	Not significant
Vamp2	P63045	-2.03212	-1.91837	-1.72193	0.0183262	Significant decrease
Hmgb1	P63159	0.10049	-0.10815	-0.0119065	0.976637	Not significant
Rack1	P63245	1.18698	0.787944	0.848508	0.12692	Not significant
Actg1	P63259	-0.388213	-0.227835	-0.282084	0.162135	Not significant
Actg2	P63269	-0.426447	0.401319	-0.0399605	0.98068	Not significant
Rala	P63322	0.650492	0.857868	0.634914	0.08698	Not significant
Ppp3ca	P63329	-0.601827	-0.741998	-0.5906	0.0661649	Not significant
Ppp3ca	P63329-2	-0.601827	-0.741998	-0.5906	0.0661649	Not significant
Ppp2ca	P63331	-0.737682	-0.767739	-0.662602	0.0127091	Significant decrease
Actc1	P68035	-0.426447	0.401319	-0.0399605	0.98068	Not significant
Eif2s1	P68101	0.705492	0.652951	0.57528	0.0246107	Significant increase
Acta1	P68136	-0.426447	0.401319	-0.0399605	0.98068	Not significant
Tuba1a	P68370	0.667711	0.757074	0.601138	0.0398767	Significant increase
Ywhah	P68511	0.142109	0.139673	0.109077	0.0055033	Significant increase
Tubb5	P69897	0.45892	0.159242	0.260304	0.287373	Not significant
Mfge8	P70490	1.06334	1.60064	1.12771	0.1267	Not significant
Cdipt	P70500	-1.83609	0.169999	-0.772314	0.558775	Not significant
Pgrmc1	P70580	0.0737408	-0.153469	-0.0426788	0.785155	Not significant
Lmnb1	P70615	-0.425093	0.749483	0.104199	0.828457	Not significant
Mapk14	P70618	-0.633237	0.272487	-0.186521	0.758696	Not significant
Mapk14	P70618-2	-0.633237	0.272487	-0.186521	0.758696	Not significant
Hsp90aa1	P82995	0.337422	0.696706	0.426999	0.212874	Not significant
Rpl24	P83732	0.637578	0.753548	0.586068	0.0529491	Not significant
Ift81	P83829	0.505211	-0.217169	0.126027	0.758454	Not significant
Arf1	P84079	0.0123967	0.711861	0.286378	0.488915	Not significant
Ap2m1	P84092	-0.501742	-1.0982	-0.692239	0.227173	Not significant
H3-3b	P84245	0.0690378	0.640503	0.282552	0.431645	Not significant
Rbmxrtl	P84586	1.04051	2.3135	1.41131	0.230933	Not significant
Tubb2a	P85108	0.34311	0.159242	0.207973	0.223371	Not significant
Actr1a	P85515	0.9427	-1.14962	-0.0607321	0.937247	Not significant
Pgd	P85968	-0.362388	-0.0786354	-0.208899	0.363967	Not significant
Napb	P85969	1.0849	0.970288	0.877565	0.0354669	Significant increase
Arpc2	P85970	-0.523472	0.664321	0.0246326	0.92486	Not significant
Vcl	P85972	-0.505149	-0.278176	-0.35568	0.179548	Not significant
Pnp	P85973	-2.60912	-0.205636	-1.2765	0.449929	Not significant
Cand1	P97536	-0.348909	-0.273826	-0.283286	0.0763888	Not significant
Plpp3	P97544	0.106713	-0.32348	-0.0978752	0.702858	Not significant
Ptgr1	P97584	-2.38559	-2.29551	-2.03715	0.01225	Significant decrease
Lnpep	P97629	-1.45109	0.824157	-0.32863	0.828831	Not significant
Nrcam	P97686	0.0199149	-0.208969	-0.0898839	0.560488	Not significant
Nrcam	P97686-2	0.0199149	-0.208969	-0.0898839	0.560488	Not significant
Nrcam	P97686-3	0.0199149	-0.208969	-0.0898839	0.560488	Not significant
Smc3	P97690	0.174468	-1.85171	-0.69735	0.559806	Not significant
Cd47	P97829	-0.572374	-0.13197	-0.325776	0.355739	Not significant
Cd47	P97829-2	-0.572374	-0.13197	-0.325776	0.355739	Not significant
Dlgap1	P97836	1.19454	1.02655	0.950306	0.0480577	Significant increase
Dlgap1	P97836-4	1.19454	1.02655	0.950306	0.0480577	Significant increase
Dlgap1	P97836-5	1.19454	1.02655	0.950306	0.0480577	Significant increase
Dlgap1	P97836-6	1.19454	1.02655	0.950306	0.0480577	Significant increase
Dlgap1	P97836-7	1.19454	1.02655	0.950306	0.0480577	Significant increase
Dlgap1	P97836-8	1.19454	1.02655	0.950306	0.0480577	Significant increase
Dlgap4	P97839	-0.780575	-0.0185919	-0.373111	0.48484	Not significant
Mecp2	Q00566	0.780996	0.225526	0.433171	0.321033	Not significant
Mecp2	Q00566-2	0.780996	0.225526	0.433171	0.321033	Not significant
Mecp2	Q00715	-0.488936	-0.589227	-0.476601	0.0590487	Not significant
Dlst	Q01205	0.809888	0.585035	0.594452	0.101744	Not significant
Aldh6a1	Q02253	-0.912087	-1.25076	-0.940562	0.0988836	Not significant
Sv2a	Q02563	0.725382	0.337563	0.454233	0.222719	Not significant
Pmpcb	Q03346	1.20979	-0.132338	0.479384	0.569364	Not significant
Gphn	Q03555	1.99896	0.584041	1.13135	0.319035	Not significant
Gphn	Q03555-2	1.99896	0.584041	1.13135	0.319035	Not significant
Gphn	Q03555-3	1.99896	0.584041	1.13135	0.319035	Not significant
Gphn	Q03555-4	1.99896	0.584041	1.13135	0.319035	Not significant
Gphn	Q03555-5	1.99896	0.584041	1.13135	0.319035	Not significant
Gphn	Q03555-6	1.99896	0.584041	1.13135	0.319035	Not significant
Ssrp1	Q04931	0.600611	2.07962	1.11611	0.32101	Not significant
Snap91	Q05140	0.838404	0.0996719	0.407222	0.42467	Not significant
Snap91	Q05140-2	0.838404	0.0996719	0.407222	0.42467	Not significant
Fau	Q05474	0.208538	-0.639599	-0.182199	0.700648	Not significant
Add2	Q05764	0.34611	0.647345	0.410574	0.187426	Not significant
Add2	Q05764-2	0.34611	0.647345	0.410574	0.187426	Not significant
Slc25a4	Q05962	0.414032	-0.358955	0.0263673	0.954716	Not significant
Nme1	Q05982	-1.22354	0.331214	-0.429047	0.668301	Not significant
Atp5po	Q06647	0.674974	3.91093	1.90476	0.3912	Not significant
Eif5	Q07205	0.750452	0.429752	0.503571	0.168912	Not significant
Tgfb2	Q07257	-1.44666	-0.29115	-0.786471	0.373565	Not significant
Tgfb2	Q07257-2	-1.44666	-0.29115	-0.786471	0.373565	Not significant
Nrxn3	Q07310	0.119101	0.0651621	0.06796	0.18129	Not significant
Nrxn3	Q07310-17	0.119101	0.0651621	0.06796	0.18129	Not significant
Nrxn3	Q07310-18	0.119101	0.0651621	0.06796	0.18129	Not significant
Nrxn3	Q07310-19	0.119101	0.0651621	0.06796	0.18129	Not significant
Nrxn3	Q07310-2	0.119101	0.0651621	0.06796	0.18129	Not significant
Nrxn3	Q07310-3	0.119101	0.0651621	0.06796	0.18129	Not significant
Nrxn3	Q07310-4	0.119101	0.0651621	0.06796	0.18129	Not significant
Nrxn3	Q07310-5	0.119101	0.0651621	0.06796	0.18129	Not significant
Nrxn3	Q07310-6	0.119101	0.0651621	0.06796	0.18129	Not significant
Nrxn3	Q07310-7	0.119101	0.0651621	0.06796	0.18129	Not significant
Nrxn3	Q07310-8	0.119101	0.0651621	0.06796	0.18129	Not significant
Hspa1a	Q07439	-0.607714	-0.529563	-0.505674	0.043678	Significant decrease
Slc2a3	Q07647	-0.591865	0.273887	-0.167248	0.775917	Not significant
Anxa2	Q07936	0.334054	2.85513	1.3154	0.425852	Not significant
Anxa2	Q07936-2	0.334054	2.85513	1.3154	0.425852	Not significant
Cap1	Q08163	-1.39688	-1.40834	-1.2246	0.00260046	Significant decrease
Stx3	Q08849	-0.926033	-1.0839	-0.878066	0.0498991	Significant decrease
Dnm3	Q08877	0.443969	-0.305756	0.0618296	0.883941	Not significant
Dnm3	Q08877-10	0.443969	-0.305756	0.0618296	0.883941	Not significant
Dnm3	Q08877-11	0.443969	-0.305756	0.0618296	0.883941	Not significant
Dnm3	Q08877-12	0.443969	-0.305756	0.0618296	0.883941	Not significant
Dnm3	Q08877-13	0.443969	-0.305756	0.0618296	0.883941	Not significant
Dnm3	Q08877-2	0.443969	-0.305756	0.0618296	0.883941	Not significant
Dnm3	Q08877-3	0.443969	-0.305756	0.0618296	0.883941	Not significant
Dnm3	Q08877-4	0.443969	-0.305756	0.0618296	0.883941	Not significant
Dnm3	Q08877-5	0.443969	-0.305756	0.0618296	0.883941	Not significant
Dnm3	Q08877-6	0.443969	-0.305756	0.0618296	0.883941	Not significant
Dnm3	Q08877-7	0.443969	-0.305756	0.0618296	0.883941	Not significant
Dnm3	Q08877-9	0.443969	-0.305756	0.0618296	0.883941	Not significant
Slc25a5	Q09073	0.535711	0.087309	0.265346	0.397149	Not significant
Eif3a	Q1JU68	0.0581675	0.785462	0.337406	0.452941	Not significant
Yap1	Q2EJA0	-0.369756	-0.0624139	-0.205541	0.393544	Not significant
Specc1l	Q2KN99	-1.13405	-1.06552	-0.964485	0.0198258	Significant decrease
Tes	Q2LAP6	1.42428	1.94742	1.43379	0.0979946	Not significant
Kif5b	Q2PQA9	0.217223	0.412655	0.25557	0.191528	Not significant
Opa1	Q2TA68	0.66629	-0.169752	0.218365	0.658814	Not significant
Opa1	Q2TA68-2	0.66629	-0.169752	0.218365	0.658814	Not significant
Opa1	Q2TA68-3	0.66629	-0.169752	0.218365	0.658814	Not significant
Trpm1	Q2WEA5	1.11576	-1.04224	0.0617408	0.978319	Not significant
Trpm1	Q2WEA5-2	1.11576	-1.04224	0.0617408	0.978319	Not significant
Fubp1	Q32PX7	0.602622	0.830064	0.60182	0.100228	Not significant
Fkbp8	Q3B7U9	0.192706	0.268825	0.185191	0.104058	Not significant
Tomm34	Q3KRD5	0.00271268	0.361764	0.137657	0.495226	Not significant
Tubb2b	Q3KRE8	0.34311	0.159242	0.207973	0.223371	Not significant
Arfgap2	Q3MID3	-0.0499681	-1.00171	-0.448309	0.46827	Not significant
Vat1	Q3MIE4	-1.72127	-0.376946	-0.945934	0.362751	Not significant
Hnrnpdl	Q3SWU3	0.0987558	-0.240344	-0.0671937	0.748194	Not significant
Prrc1	Q3T1I4	-0.282799	-0.0932441	-0.178959	0.297241	Not significant
Chtop	Q498T2	0.362294	0.093871	0.189689	0.3386	Not significant
Chtop	Q498T2-2	0.362294	0.093871	0.189689	0.3386	Not significant
Ubxn1	Q499N6	1.05517	1.58062	1.11577	0.12527	Not significant
Gas8	Q499U4	3.31956	4.1378	3.19331	0.0695732	Not significant
Ppme1	Q4FZT2	0.630733	0.255247	0.377525	0.255196	Not significant
Psmd2	Q4FZT9	-0.181792	0.581311	0.144803	0.692955	Not significant
Eif3b	Q4G061	-0.33215	0.530572	0.0559413	0.856083	Not significant
Arpc5	Q4KLF8	-1.46227	-0.113454	-0.720263	0.450705	Not significant
Pspc1	Q4KLH4	1.41606	1.13892	1.09673	0.0687879	Not significant
Tcea1	Q4KLL0	-0.148521	0.0381962	-0.0640892	0.660251	Not significant
Yars1	Q4KM49	0.640713	0.104581	0.319915	0.396995	Not significant
Nudt21	Q4KM65	0.35964	1.10339	0.604715	0.299412	Not significant
Cmpk1	Q4KM73	0.382935	0.884119	0.524836	0.239792	Not significant
Sec22b	Q4KM74	-1.03006	-0.518514	-0.691965	0.203113	Not significant
Rad23b	Q4KMA2	-0.682368	0.0509189	-0.300074	0.547417	Not significant
Celf1	Q4QQT3	0.203391	-0.422485	-0.0950086	0.785633	Not significant
Smndc1	Q4QQU6	0.386651	-0.292947	0.0412101	0.912772	Not significant
Chmp5	Q4QQV8	-0.563544	0.172673	-0.196182	0.689282	Not significant
Tubb3	Q4QRB4	0.46656	0.175444	0.270437	0.271021	Not significant
Actr3	Q4V7C7	-0.186383	0.516189	0.115879	0.720593	Not significant
Rbm22	Q4V7D7	-1.01376	1.77843	0.262434	0.829827	Not significant
Paf1	Q4V886	0.58666	0.384746	0.411002	0.130469	Not significant
Oxr1	Q4V8B0	0.546162	-0.409327	0.0653052	0.909446	Not significant
Usp7	Q4VSI4	1.80361	0.0777612	0.834338	0.47257	Not significant
Zfr	Q562A2	-1.20424	0.0634802	-0.530714	0.533528	Not significant
Cwc15	Q5BJP2	1.35215	0.902284	0.970289	0.12539	Not significant
Rab18	Q5EB77	0.656591	-0.243298	0.183659	0.725911	Not significant
Irf2bpl	Q5EIC4	-1.17908	0.220536	-0.454592	0.617714	Not significant
Mea1	Q5FVH7	-0.209223	-0.444652	-0.290597	0.220017	Not significant
Atp6v1c1	Q5FVI6	1.17299	0.334951	0.655418	0.322924	Not significant
Rufy3	Q5FVJ0	0.0922057	0.237414	0.126827	0.264168	Not significant
Rufy3	Q5FVJ0-2	0.0922057	0.237414	0.126827	0.264168	Not significant
Nono	Q5FVM4	-0.101522	1.07754	0.385671	0.559804	Not significant
Impact	Q5GFD9	1.31393	-0.0423953	0.563525	0.520534	Not significant
Ppp1r7	Q5HZV9	-0.220508	0.075164	-0.0813762	0.709139	Not significant
Ubxn4	Q5HZY0	0.337304	0.0963828	0.179432	0.322811	Not significant
Sar1b	Q5HZY2	-0.483127	0.554636	-0.00235953	0.956201	Not significant
Glod4	Q5I0D1	1.11233	-0.246178	0.388409	0.63866	Not significant
Pepd	Q5I0D7	-1.60203	-0.941462	-1.1248	0.161762	Not significant
Gars1	Q5I0G4	0.515422	0.29717	0.342704	0.167046	Not significant
Pip5k1c	Q5I6B8	0.341255	-0.380413	-0.0153654	0.965491	Not significant
Actr2	Q5M7U6	-1.02305	-0.899452	-0.845858	0.0408723	Significant decrease
Map4	Q5M7W5	0.17177	0.82957	0.406926	0.370019	Not significant
Map4	Q5M7W5-2	0.17177	0.82957	0.406926	0.370019	Not significant
Mrfap1	Q5M820	0.0476816	-0.82972	-0.333273	0.536544	Not significant
Mrfap1	Q5M820-2	0.0476816	-0.82972	-0.333273	0.536544	Not significant
Scyl1	Q5M9F8	0.568943	1.03521	0.671181	0.180079	Not significant
Caprin1	Q5M9G3	0.590994	0.332678	0.391493	0.173603	Not significant
Rom1	Q5PPM7	-1.04248	-1.69332	-1.18195	0.148685	Not significant
Ncald	Q5PQN0	-1.851	0.464077	-0.657801	0.656388	Not significant
Mdm1	Q5PQN4	-2.39564	-0.375214	-1.24995	0.401094	Not significant
Wbp11	Q5PQQ2	0.924612	0.546667	0.630474	0.160075	Not significant
Rsrc2	Q5PQR4	-0.757612	-0.16158	-0.421689	0.366229	Not significant
Akap12	Q5QD51	0.796616	1.22567	0.852591	0.133095	Not significant
Akap12	Q5QD51-2	0.796616	1.22567	0.852591	0.133095	Not significant
Eif3g	Q5RK09	0.703291	0.12067	0.354826	0.391823	Not significant
Glyr1	Q5RKH0	-5.25749	-3.01619	-3.63202	0.168415	Not significant
Eif4a2	Q5RKI1	-0.198352	0.0789565	-0.0698007	0.741174	Not significant
Lrpprc	Q5SGE0	-0.499836	-0.967798	-0.637611	0.196501	Not significant
Mesd	Q5U2R7	-0.115772	-0.301284	-0.189258	0.266446	Not significant
Crkl	Q5U2U2	-0.0143599	-0.487976	-0.220406	0.481271	Not significant
Gtf2i	Q5U2Y1	0.0383437	-0.218576	-0.0855174	0.610554	Not significant
Tfip11	Q5U2Y6	-1.28457	0.920028	-0.213857	0.895676	Not significant
Nap1l4	Q5U2Z3	0.66624	0.827359	0.629452	0.0684095	Not significant
Arhgap24	Q5U2Z7	-1.90349	-1.11769	-1.33369	0.161992	Not significant
Arhgap24	Q5U2Z7-2	-1.90349	-1.11769	-1.33369	0.161992	Not significant
Arhgap24	Q5U2Z7-3	-1.90349	-1.11769	-1.33369	0.161992	Not significant
Uba1	Q5U300	0.238829	-0.176786	0.0223062	0.905663	Not significant
Fip1l1	Q5U317	-1.13593	-0.837662	-0.871389	0.0954895	Not significant
Golga4	Q5U4E6	0.549315	-0.135104	0.179792	0.65353	Not significant
Tagln2	Q5XFX0	-0.618143	-0.318743	-0.423465	0.196915	Not significant
Trap1	Q5XHZ0	-1.88485	-0.676139	-1.14321	0.280733	Not significant
Capzb	Q5XI32	0.34564	0.150673	0.205583	0.238294	Not significant
Eif4h	Q5XI72	-0.62892	-0.361879	-0.446119	0.1676	Not significant
Arhgdia	Q5XI73	-0.907386	0.0754033	-0.391659	0.552781	Not significant
Ogdh	Q5XI78	0.306598	-0.164786	0.0578771	0.813961	Not significant
Ghitm	Q5XIA8	0.137928	-0.39611	-0.113715	0.713316	Not significant
Degs1	Q5XIF5	0.0529829	-0.0101856	0.00701725	0.62091	Not significant
Ociad1	Q5XIG4	0.158064	-0.192831	-0.0208042	0.937129	Not significant
Katnal1	Q5XIK7	0.482381	-0.137578	0.148527	0.676872	Not significant
Cct2	Q5XIM9	0.104186	0.346872	0.17737	0.314243	Not significant
Cxxc5	Q5XIQ3	-1.15031	-1.05056	-0.965667	0.0288339	Significant decrease
Psmf1	Q5XIU5	0.354116	0.0435967	0.165266	0.422016	Not significant
Sart1	Q5XIW8	-0.496347	-0.937854	-0.623688	0.190117	Not significant
Hadhb	Q60587	-0.632655	5.80069	2.09302	0.56916	Not significant
Fkbp1a	Q62658	-1.02542	-1.51587	-1.10108	0.121369	Not significant
Ubr5	Q62671	-1.31168	-0.656136	-0.875964	0.204718	Not significant
Dync1li2	Q62698	-3.38691	-1.12868	-2.00853	0.295216	Not significant
Cadps	Q62717	0.918334	0.137167	0.458799	0.405609	Not significant
Cd81	Q62745	-0.472409	-0.0691072	-0.254687	0.407527	Not significant
Myh9	Q62812	-1.18326	1.28565	-0.0173316	0.973612	Not significant
Hnrnpm	Q62826	0.0445625	-0.534849	-0.213107	0.55292	Not significant
Pak3	Q62829	-0.349959	-3.88406	-1.77226	0.442794	Not significant
Golga2	Q62839	0.924088	1.04648	0.836308	0.0394885	Significant increase
Add3	Q62847	-1.17036	-0.743516	-0.848131	0.139696	Not significant
Add3	Q62847-2	-1.17036	-0.743516	-0.848131	0.139696	Not significant
Rere	Q62901	4.19052	-2.0463	1.03716	0.78919	Not significant
Synj1	Q62910	0.429889	-0.24184	0.0818196	0.826228	Not significant
Synj1	Q62910-2	0.429889	-0.24184	0.0818196	0.826228	Not significant
Synj1	Q62910-4	0.429889	-0.24184	0.0818196	0.826228	Not significant
Synj1	Q62910-5	0.429889	-0.24184	0.0818196	0.826228	Not significant
Pdlim5	Q62920	2.65955	-1.32575	0.642446	0.794396	Not significant
Cnga1	Q62927	-0.371581	-1.1118	-0.639027	0.294661	Not significant
Nedd4	Q62940	-0.991047	-0.979356	-0.864341	0.00377734	Significant decrease
Crmp1	Q62950	1.13895	2.51441	1.53863	0.229233	Not significant
Dpysl4	Q62951	0.395869	-0.608749	-0.0848301	0.867066	Not significant
Dpysl3	Q62952	0.459614	0.315279	0.324952	0.117236	Not significant
Dpysl3	Q62952-2	0.459614	0.315279	0.324952	0.117236	Not significant
Scfd1	Q62991	0.470645	1.65947	0.884147	0.324067	Not significant
Add1	Q63028	0.186401	-0.262014	-0.0365239	0.893652	Not significant
Add1	Q63028-2	0.186401	-0.262014	-0.0365239	0.893652	Not significant
Pdk1	Q63065	-0.264545	-0.467373	-0.324964	0.1721	Not significant
Nucb1	Q63083	-1.01028	-0.387927	-0.629185	0.266603	Not significant
Camkv	Q63092	2.0391	0.514878	1.12097	0.342543	Not significant
Acsl3	Q63151	0.40039	-1.96043	-0.640087	0.628257	Not significant
Acsl3	Q63151-2	0.40039	-1.96043	-0.640087	0.628257	Not significant
Cntn1	Q63198	0.248523	0.00111185	0.100034	0.497152	Not significant
Psmc2	Q63347	0.80367	0.880165	0.713325	0.0289013	Significant increase
Sub1	Q63396	0.276163	0.0681802	0.140177	0.34591	Not significant
Camk1	Q63450	-1.57153	-1.98705	-1.54212	0.0739992	Not significant
Ddr1	Q63474	-1.29	-1.3774	-1.16355	0.0208525	Significant decrease
Gtf3c1	Q63505	0.410253	0.541332	0.395849	0.0871444	Not significant
Nudc	Q63525	-0.0778928	-0.26681	-0.157928	0.31917	Not significant
Map6	Q63560	0.593351	0.194434	0.33556	0.298407	Not significant
Map6	Q63560-2	0.593351	0.194434	0.33556	0.298407	Not significant
Sv2b	Q63564	0.0445282	-0.773735	-0.311615	0.536597	Not significant
Psmc3	Q63569	0.301072	0.332616	0.26046	0.0316635	Significant increase
Tmed10	Q63584	-1.03847	-0.210789	-0.568891	0.372511	Not significant
Pls3	Q63598	1.30371	0.595585	0.821945	0.227191	Not significant
Tpm3	Q63610	-0.657377	0.325569	-0.175543	0.792746	Not significant
Hyou1	Q63617	0.693603	0.771822	0.618918	0.0339485	Significant increase
Dlg2	Q63622	1.20845	0.183838	0.609138	0.40389	Not significant
Dlg2	Q63622-2	1.20845	0.183838	0.609138	0.40389	Not significant
Dlg2	Q63622-3	1.20845	0.183838	0.609138	0.40389	Not significant
Dlg2	Q63622-4	1.20845	0.183838	0.609138	0.40389	Not significant
Dlg2	Q63622-5	1.20845	0.183838	0.609138	0.40389	Not significant
Dlg2	Q63622-6	1.20845	0.183838	0.609138	0.40389	Not significant
Dlg2	Q63622-7	1.20845	0.183838	0.609138	0.40389	Not significant
Slc12a5	Q63633	0.898136	0.852587	0.744641	0.0165594	Significant increase
Slc12a5	Q63633-2	0.898136	0.852587	0.744641	0.0165594	Significant increase
Grk1	Q63651	-2.58043	-3.06472	-2.44234	0.0544808	Not significant
Cdc37	Q63692	0.918115	0.124803	0.453603	0.413989	Not significant
Prdx1	Q63716	-0.963354	-0.0376538	-0.463563	0.47513	Not significant
Rab3b	Q63941	-0.408707	-1.40231	-0.775582	0.319457	Not significant
Myl6	Q64119	-0.283814	0.82387	0.19871	0.711203	Not significant
Lipa	Q64194	-1.23507	1.47791	0.0385234	0.943168	Not significant
Ddx1	Q641Y8	-0.237837	-0.795364	-0.448126	0.31502	Not significant
Ehd1	Q641Z6	-0.400286	0.556216	0.0357255	0.897122	Not significant
Pak2	Q64303	-0.265953	-3.88406	-1.7343	0.456477	Not significant
Hadha	Q64428	-1.43585	-1.1897	-1.15206	0.0595119	Not significant
Rtn1	Q64548	0.22368	-0.397936	-0.0757193	0.826004	Not significant
Arcn1	Q66H80	-0.0134055	-0.141459	-0.077106	0.43985	Not significant
Arl8b	Q66HA6	1.20287	1.29083	1.06303	0.0224447	Significant increase
Hsph1	Q66HA8	0.22249	0.282019	0.204089	0.0747712	Not significant
Hsp90b1	Q66HD0	-0.707935	-0.00571034	-0.334976	0.494865	Not significant
Hsp90b1	Q66HD0-2	-0.707935	-0.00571034	-0.334976	0.494865	Not significant
Ndufs1	Q66HF1	0.562668	-0.0960078	0.201945	0.60759	Not significant
Lrrfip1	Q66HF9	2.64144	-0.786655	0.85653	0.684269	Not significant
Ik	Q66HG8	0.168457	-0.667664	-0.211882	0.657341	Not significant
Snd1	Q66X93	-1.97214	-0.240842	-1.00318	0.422638	Not significant
Gsn	Q68FP1-2	-0.598294	0.921739	0.0969562	0.866526	Not significant
Cct5	Q68FQ0	0.38354	-0.340087	0.0203685	0.961817	Not significant
Eef1d	Q68FR9	-0.261453	-0.0265272	-0.141805	0.435628	Not significant
Eef1d	Q68FR9-2	-0.261453	-0.0265272	-0.141805	0.435628	Not significant
Cops4	Q68FS2	0.352389	0.356089	0.293326	0.00332452	Significant increase
Sugp1	Q68FU8	0.620625	0.0662257	0.295024	0.432324	Not significant
Cops3	Q68FW9	-0.486773	-0.366089	-0.383623	0.0894901	Not significant
Idh3B	Q68FX0	0.557032	-1.67622	-0.452124	0.704249	Not significant
Uqcrc1	Q68FY0	0.353238	-0.300892	0.022836	0.949163	Not significant
Sae1	Q6AXQ0	0.642683	-0.577416	0.039617	0.965978	Not significant
Dek	Q6AXS3	-0.544472	-0.134662	-0.314278	0.345645	Not significant
Atp6ap2	Q6AXS4	0.921137	0.144411	0.463053	0.401	Not significant
Prxl2a	Q6AXX6	1.0057	-0.492258	0.238767	0.78978	Not significant
Hnrnph2	Q6AY09	1.11455	0.154196	0.554486	0.41248	Not significant
Scrn1	Q6AY84	0.799273	0.378352	0.50444	0.218539	Not significant
Vps26a	Q6AY86	1.60773	1.16385	1.19362	0.101098	Not significant
Srp54	Q6AYB5	0.215307	-0.257381	-0.0215519	0.943483	Not significant
Dctn2	Q6AYH5	-0.493497	0.481627	-0.0371474	0.992251	Not significant
Lyar	Q6AYK5	0.2586	0.425059	0.279381	0.152047	Not significant
Phyhipl	Q6AYN4	0.998798	0.200877	0.521427	0.37365	Not significant
Rtcb	Q6AYT3	0.767904	-0.265843	0.224663	0.712172	Not significant
S100a11	Q6B345	-1.76365	4.32272	0.972592	0.746613	Not significant
Ahi1	Q6DTM3	-1.9475	-2.32371	-1.85081	0.0559296	Not significant
Katna1	Q6E0V2	0.482381	-0.137578	0.148527	0.676872	Not significant
Baiap2	Q6GMN2	-0.054763	0.532745	0.182181	0.565212	Not significant
Baiap2	Q6GMN2-2	-0.054763	0.532745	0.182181	0.565212	Not significant
Tmem35a	Q6JAM9	0.869679	-0.153024	0.317168	0.610881	Not significant
Ndrg1	Q6JE36	0.778997	-0.294706	0.217775	0.730249	Not significant
Histone H3.1	Q6LED0	0.0690378	0.640503	0.282552	0.431645	Not significant
Prrc2a	Q6MG48	-0.650947	-0.0207506	-0.315425	0.479713	Not significant
Bag6	Q6MG49	-0.10389	0.845565	0.288957	0.577828	Not significant
Prrt1	Q6MG82	-0.66166	-1.9226	-1.1044	0.288991	Not significant
Rab1A	Q6NYB7	0.747919	0.587392	0.567422	0.0761667	Not significant
Jup	Q6P0K8	-0.163425	-0.809281	-0.420239	0.373148	Not significant
Cct3	Q6P502	0.0206443	0.269048	0.107533	0.451247	Not significant
Gpi	Q6P6V0	1.08832	0.201563	0.562162	0.383416	Not significant
Dab2ip	Q6P730	-1.25141	-0.50354	-0.785813	0.256458	Not significant
Ube4a	Q6P7A2	-1.18629	-0.775085	-0.868345	0.131563	Not significant
Wars1	Q6P7B0	-0.597292	-0.2045	-0.36694	0.289999	Not significant
Scd2	Q6P7B9	-0.90331	-1.1343	-0.888578	0.0718623	Not significant
Bzw1	Q6P7P5	-0.568376	-0.261126	-0.377221	0.225831	Not significant
Glo1	Q6P7Q4	0.206961	0.103837	0.123607	0.203956	Not significant
Hsd17b12	Q6P7R8	-0.0608366	-0.0432518	-0.0580479	0.106545	Not significant
Tubb4b	Q6P9T8	0.487471	0.159242	0.273206	0.298993	Not significant
Eif3h	Q6P9U8	-0.671739	-0.0284791	-0.328007	0.473026	Not significant
Tuba1b	Q6P9V9	0.667711	0.757074	0.601138	0.0398767	Significant increase
Atp6v1e1	Q6PCU2	0.479227	-0.113747	0.156927	0.648359	Not significant
Srsf2	Q6PDU1	0.856808	0.965343	0.772455	0.0378749	Significant increase
Rpl10	Q6PDV7	-0.272278	-0.132854	-0.190536	0.211007	Not significant
Cndp2	Q6Q0N1	-1.15494	0.910047	-0.159398	0.924852	Not significant
Gna13	Q6Q7Y5	1.62865	0.500794	0.929696	0.310087	Not significant
Kif5a	Q6QLM7	-1.45064	-1.32933	-1.21632	0.027762	Significant decrease
Scgn	Q6R556	1.49034	0.0751982	0.691723	0.467905	Not significant
Rac1	Q6RUV5	-0.011004	-0.0405762	-0.0344267	0.331408	Not significant
Yipf3	Q6TUD4	-1.2366	0.408205	-0.403205	0.70298	Not significant
Hnrnpa3	Q6URK4	0.313214	0.326225	0.263311	0.0129514	Significant increase
Hnrnpa3	Q6URK4-2	0.313214	0.326225	0.263311	0.0129514	Significant increase
Arpp19	Q712U5	-0.132979	-1.0585	-0.509234	0.420438	Not significant
Arpp19	Q712U5-2	-0.132979	-1.0585	-0.509234	0.420438	Not significant
Rbbp7	Q71UF4	-0.0256711	0.104581	0.0187942	0.653238	Not significant
Tomm70	Q75Q39	0.511376	0.309444	0.345936	0.153567	Not significant
Tomm22	Q75Q41	0.77034	0.0610069	0.360524	0.449688	Not significant
Iqsec3	Q76M68	0.83136	-0.136212	0.306784	0.603387	Not significant
Celf2	Q792H5	-1.09661	-1.78125	-1.24266	0.148689	Not significant
Celf2	Q792H5-2	-1.09661	-1.78125	-1.24266	0.148689	Not significant
Celf2	Q792H5-3	-1.09661	-1.78125	-1.24266	0.148689	Not significant
Celf2	Q792H5-4	-1.09661	-1.78125	-1.24266	0.148689	Not significant
Hnrnpf	Q794E4	0.532883	0.411868	0.397884	0.081104	Not significant
Ube2v2	Q7M767	0.334881	0.292782	0.259313	0.0426364	Significant increase
Plppr4	Q7TMB7	1.37297	-0.110344	0.562187	0.551055	Not significant
Acbd3	Q7TNY6	-0.110379	-1.36065	-0.6236	0.448469	Not significant
Cct4	Q7TPB1	-0.172875	-0.512751	-0.30225	0.292982	Not significant
Sgtb	Q80W98	0.661946	-0.342394	0.145222	0.803893	Not significant
Nampt	Q80Z29	2.97659	2.68443	2.43911	0.0328262	Significant increase
Slc4a10	Q80ZA5	0.662871	-0.121925	0.236539	0.615802	Not significant
Slc4a10	Q80ZA5-2	0.662871	-0.121925	0.236539	0.615802	Not significant
Slc4a10	Q80ZA5-3	0.662871	-0.121925	0.236539	0.615802	Not significant
Slc4a10	Q80ZA5-4	0.662871	-0.121925	0.236539	0.615802	Not significant
Fam3c	Q810F4	-0.827597	-0.361398	-0.535698	0.237888	Not significant
Erc1	Q811U3	0.153366	-0.0490759	0.036343	0.697159	Not significant
Sfxn5	Q8CFD0	-0.804077	-1.828	-1.12975	0.236188	Not significant
Cacna2d2	Q8CFG6	0.728186	0.946095	0.706399	0.0823935	Not significant
Smarca4	Q8K1P7	0.867431	0.893941	0.747816	0.00958084	Significant increase
Nmt1	Q8K1Q0	0.127995	-0.868263	-0.312873	0.593176	Not significant
Msi1	Q8K3P4	-1.10816	-0.693575	-0.799434	0.143982	Not significant
Hsbp1	Q8K3X8	0.257585	0.162225	0.170556	0.142196	Not significant
Osbpl1a	Q8K4M9	0.439745	2.06519	1.03746	0.366438	Not significant
Mgll	Q8R431	0.471912	-1.60251	-0.460195	0.682321	Not significant
Wbp2	Q8R478	-0.66033	-1.30107	-0.847543	0.20101	Not significant
Ehd3	Q8R491	0.628192	0.225364	0.364056	0.280717	Not significant
Itfg1	Q8R4E1	0.0381717	0.2286	0.0987761	0.394669	Not significant
Lrrc15	Q8R5M3	-0.555501	-0.285181	-0.381321	0.198056	Not significant
Ndrg2	Q8VBU2	-0.623645	-1.21481	-0.795401	0.198061	Not significant
Ndrg2	Q8VBU2-2	-0.623645	-1.21481	-0.795401	0.198061	Not significant
Hdgf	Q8VHK7	0.589308	0.107354	0.29783	0.385285	Not significant
Hnrnph1	Q8VHV7	-1.0706	0.272583	-0.384115	0.658716	Not significant
Hnrnph1	Q8VHV7-2	-1.0706	0.272583	-0.384115	0.658716	Not significant
Oga	Q8VIJ5	0.171191	0.227856	0.158577	0.0897998	Not significant
Oga	Q8VIJ5-3	0.171191	0.227856	0.158577	0.0897998	Not significant
Zwint	Q8VIL3	0.552279	-0.248984	0.134179	0.769637	Not significant
Gpx4	Q91XR8	-0.136929	-0.48525	-0.274668	0.32491	Not significant
Qki	Q91XU1	-2.43795	-2.43999	-2.12038	0.000266031	Significant decrease
Khdrbs2	Q920F3	0.375857	-0.357195	0.00984313	0.983796	Not significant
Sdha	Q920L2	0.434781	0.144178	0.243186	0.296155	Not significant
Hdgfl2	Q925G1	-1.34435	-0.079467	-0.652965	0.462412	Not significant
Hdgfl2	Q925G1-2	-1.34435	-0.079467	-0.652965	0.462412	Not significant
Tfrc	Q99376	1.66808	1.50868	1.36307	0.0319168	Significant increase
Ilk	Q99J82	-2.23369	-0.462008	-1.21256	0.370155	Not significant
Clasp2	Q99JD4	-0.389113	-1.58159	-0.840644	0.346425	Not significant
Smu1	Q99M63	0.412953	0.30196	0.298376	0.0980545	Not significant
Pcyox1	Q99ML5	0.202474	0.709988	0.371497	0.323144	Not significant
Lasp1	Q99MZ8	-0.865578	0.300228	-0.280072	0.712547	Not significant
Snx1	Q99N27	-0.261332	0.28148	-0.0147592	0.976381	Not significant
Idh3a	Q99NA5	0.977254	0.397306	0.59268	0.254173	Not significant
Khsrp	Q99PF5	0.301614	-0.0453228	0.10488	0.594953	Not significant
Pfn2	Q9EPC6	1.08659	0.839898	0.824568	0.0810805	Not significant
Mcam	Q9EPF2	-1.6533	-0.320834	-0.892088	0.377977	Not significant
Mcam	Q9EPF2-2	-1.6533	-0.320834	-0.892088	0.377977	Not significant
Pabpc1	Q9EPH8	0.629437	0.452743	0.458367	0.103036	Not significant
Taldo1	Q9EQS0	-0.536645	0.264615	-0.146119	0.791639	Not significant
Tpp1	Q9EQV6	-0.0549073	0.853438	0.314337	0.540902	Not significant
Ube2n	Q9EQX9	-0.152464	0.333861	0.0560321	0.772719	Not significant
Atxn10	Q9ER24	-0.290728	-0.399682	-0.308886	0.099644	Not significant
Sacm1l	Q9ES21	0.0782639	1.03151	0.447934	0.45179	Not significant
Arl6ip5	Q9ES40	0.454922	0.467222	0.385478	0.00849109	Significant increase
Ufd1	Q9ES53	0.207403	-0.561602	-0.150554	0.725216	Not significant
Ddb1	Q9ESW0	0.412129	-0.446139	-0.0104382	0.974787	Not significant
Tsnax	Q9JHB5	-1.0992	0.416916	-0.337527	0.730793	Not significant
Dbnl	Q9JHL4	-0.243873	0.949558	0.268579	0.660043	Not significant
Dbnl	Q9JHL4-2	-0.243873	0.949558	0.268579	0.660043	Not significant
Dbnl	Q9JHL4-3	-0.243873	0.949558	0.268579	0.660043	Not significant
Dbnl	Q9JHL4-4	-0.243873	0.949558	0.268579	0.660043	Not significant
Vti1a	Q9JI51	0.196264	0.154894	0.139825	0.074656	Not significant
Vti1a	Q9JI51-2	0.196264	0.154894	0.139825	0.074656	Not significant
Sdcbp	Q9JI92	0.0761049	0.56882	0.25619	0.415327	Not significant
Pdcd4	Q9JID1	-0.842139	-0.625012	-0.650957	0.0935356	Not significant
Ilf3	Q9JIL3	0.633702	-0.798461	-0.0555783	0.927082	Not significant
Ilf3	Q9JIL3-2	0.633702	-0.798461	-0.0555783	0.927082	Not significant
Chd8	Q9JIX5	0.166944	-0.209765	-0.023774	0.927942	Not significant
Hnrnpd	Q9JJ54	-1.26809	-1.32075	-1.13029	0.0129491	Significant decrease
Hnrnpd	Q9JJ54-2	-1.26809	-1.32075	-1.13029	0.0129491	Significant decrease
Hnrnpd	Q9JJ54-3	-1.26809	-1.32075	-1.13029	0.0129491	Significant decrease
Hnrnpd	Q9JJ54-4	-1.26809	-1.32075	-1.13029	0.0129491	Significant decrease
Ubqln1	Q9JJP9	0.268625	0.709364	0.401131	0.269546	Not significant
Atp5md	Q9JJW3	-0.309806	-0.504806	-0.360849	0.149578	Not significant
Rtn4	Q9JK11	0.108141	0.760302	0.349615	0.410054	Not significant
Adnp	Q9JKL8	1.46282	-0.309803	0.520554	0.632863	Not significant
Pclo	Q9JKS6	1.03845	-1.13197	-0.0101895	0.972586	Not significant
Pclo	Q9JKS6-2	1.03845	-1.13197	-0.0101895	0.972586	Not significant
Pclo	Q9JKS6-3	1.03845	-1.13197	-0.0101895	0.972586	Not significant
Uggt1	Q9JLA3	-0.390828	-0.243797	-0.289847	0.144936	Not significant
Aipl1	Q9JLG9	-1.57759	-3.38817	-2.12254	0.222583	Not significant
Cdk5rap3	Q9JLH7	-0.53489	-1.8624	-1.0223	0.321952	Not significant
Aldh9a1	Q9JLJ3	-0.320325	-0.392663	-0.319366	0.0643697	Not significant
Khdrbs3	Q9JLP1	0.375857	-0.357195	0.00984313	0.983796	Not significant
Aifm1	Q9JM53	1.09668	-1.40951	-0.0983083	0.920943	Not significant
Nsf	Q9QUL6	1.09213	0.122452	0.531268	0.428918	Not significant
Fkbp4	Q9QVC8	-0.567907	0.825121	0.0708516	0.883761	Not significant
Actn4	Q9QXQ0	-1.26762	-0.217549	-0.675221	0.391797	Not significant
Myo5a	Q9QYF3	0.569126	0.352443	0.38976	0.147014	Not significant
Crym	Q9QYU4	-0.253043	-0.315786	-0.257267	0.0699379	Not significant
Pdcd6ip	Q9QZA2	0.35929	-0.751628	-0.160269	0.783872	Not significant
Septin9	Q9QZR6	-0.189784	0.201922	-0.0152304	0.980279	Not significant
Septin9	Q9QZR6-2	-0.189784	0.201922	-0.0152304	0.980279	Not significant
Gorasp2	Q9R064	-2.67568	-1.91323	-2.01062	0.104817	Not significant
Gorasp2	Q9R1N3-2	-0.152085	0.0369484	-0.0662139	0.651725	Not significant
Gorasp2	Q9R1N3-3	-0.152085	0.0369484	-0.0662139	0.651725	Not significant
Gorasp2	Q9R1N3-4	-0.152085	0.0369484	-0.0662139	0.651725	Not significant
Gorasp2	Q9R1N3-5	-0.152085	0.0369484	-0.0662139	0.651725	Not significant
Gorasp2	Q9R1R4-2	-0.370732	0.126012	-0.128293	0.708588	Not significant
Vdac3	Q9R1Z0	1.19346	1.77334	1.25772	0.122883	Not significant
Vdac3	Q9R1Z0-2	1.19346	1.77334	1.25772	0.122883	Not significant
Mapk8ip1	Q9R237	-0.650163	-0.803113	-0.63764	0.0667556	Not significant
Mapk8ip1	Q9R237-2	-0.650163	-0.803113	-0.63764	0.0667556	Not significant
Mapk8ip1	Q9R237-3	-0.650163	-0.803113	-0.63764	0.0667556	Not significant
Chi3l1	Q9WTV1	-0.100931	0.309695	0.0693551	0.700566	Not significant
Ctnnb1	Q9WU82	-0.345554	-0.523353	-0.38465	0.128494	Not significant
Plrg1	Q9WUC8	0.896874	-1.04871	-0.0398362	0.950418	Not significant
Ncoa2	Q9WUI9	-0.802752	-1.40658	-0.955401	0.169846	Not significant
Top1	Q9WUL0	-0.211256	-0.110234	-0.153635	0.193826	Not significant
Puf60	Q9WV25	0.177258	-0.130643	0.013509	0.904345	Not significant
Puf60	Q9WV25-2	0.177258	-0.130643	0.013509	0.904345	Not significant
Rab6a	Q9WVB1	0.463076	0.698369	0.484465	0.127248	Not significant
Septin7	Q9WVC0	-0.511162	0.163417	-0.176328	0.696988	Not significant
Pacsin1	Q9Z0W5	0.477964	0.629818	0.462928	0.0867266	Not significant
Clic4	Q9Z0W7	0.137077	1.24573	0.562833	0.430229	Not significant
Adgrl3	Q9Z173	0.0383781	-0.446304	-0.179394	0.554609	Not significant
Adgrl3	Q9Z173-2	0.0383781	-0.446304	-0.179394	0.554609	Not significant
Adgrl3	Q9Z173-3	0.0383781	-0.446304	-0.179394	0.554609	Not significant
Adgrl3	Q9Z173-4	0.0383781	-0.446304	-0.179394	0.554609	Not significant
Adgrl3	Q9Z173-5	0.0383781	-0.446304	-0.179394	0.554609	Not significant
Adgrl3	Q9Z173-6	0.0383781	-0.446304	-0.179394	0.554609	Not significant
Adgrl3	Q9Z173-7	0.0383781	-0.446304	-0.179394	0.554609	Not significant
Hdlbp	Q9Z1A6	-0.0269161	0.582846	0.215421	0.529379	Not significant
Flot1	Q9Z1E1	0.261671	0.426082	0.281191	0.149384	Not significant
Actn1	Q9Z1P2	-0.581858	-0.138243	-0.332648	0.3515	Not significant
Lin7a	Q9Z250	1.29235	0.325944	0.705638	0.342717	Not significant
Gipc1	Q9Z254	5.46383	-1.26808	1.9334	0.64518	Not significant
Vapb	Q9Z269	0.915395	0.0654366	0.427897	0.454569	Not significant
Nap1l1	Q9Z2G8	-0.50156	0.237737	-0.141347	0.781786	Not significant
Svop	Q9Z2I7	0.513616	-0.533655	-0.000662117	0.98782	Not significant
Ndrg4	Q9Z2L9	0.307827	-0.500504	-0.0799843	0.851033	Not significant
Ndrg4	Q9Z2L9-2	0.307827	-0.500504	-0.0799843	0.851033	Not significant
Ndrg4	Q9Z2L9-3	0.307827	-0.500504	-0.0799843	0.851033	Not significant
Ndrg4	Q9Z2L9-4	0.307827	-1.15763	-0.350917	0.665456	Not significant
Ndrg4	Q9Z2L9-5	0.307827	-1.15763	-0.350917	0.665456	Not significant
Ndrg4	Q9Z2L9-6	0.307827	-1.15763	-0.350917	0.665456	Not significant
Sec31a	Q9Z2Q1	-0.449735	-0.267507	-0.326241	0.158393	Not significant
Sec31a	Q9Z2Q1-2	-0.449735	-0.267507	-0.326241	0.158393	Not significant
