# Supplementary material for: Quantitative transportomics identifies Kif5a as a major regulator of neurodegeneration
Source: eLife. 2022 Mar 8;11:e68148. doi: 10.7554/eLife.68148 (PMC8947766; doi:10.7554/eLife.68148)
Supplement: Figure 4—source data 1. [file elife-68148-fig4-data1.xlsx]

## Sheet: Figure 4- source data 1
Legend: Proteomic quantification of transportome changes in Kif5a knockout from Figure 4c.
UniProt_ID	Control_Replicate1_NSAF	Control_Replicate2_NSAF	Kif5aKO_Replicate1_NSAF	Kif5aKO_Replicate2_NSAF	Kif5aKO_Replicate3_NSAF	Gene_Name
Q9D2U9	0.00336144	0	0.00131756	0.0115679	0.00236711	Hist3h2ba
Q5RJI5	0	0.000158878	0	0	0.000127787	Brsk1
A0A0A6YY29	0.00156867	0.00183121	0	0.000830513	0	Cacybp
F6YY69	0.00482986	0.0264562	0.00203875	0.00511421	0.00558139	Ywhaq
Q9Z0P4	0	0.000968199	0	0	0.000259579	Palm
E9PW16	0	0	0	0	0.000243673	Grk2
D3YWU0	0.000440272	0	0	0	0	Dlg2
O35495	0	0	0	0	0.00021198	Cdk14
P18760	0.0146709	0.00521233	0.0205015	0.0297183	0.0173683	Cfl1
Q71LX4	0	5.20449e-05	0	9.44162e-05	0.000167442	Tln2
O70251	0	0	0	0.000498308	0	Eef1b
Q6P1B9	0.00488361	0	0.000696069	0.000235051	0	Bin1
A0A0U1RNJ1	0.000169281	0.00014821	0	0.000268871	0.000158943	Fasn
Q8CE80	0	0.000163935	0	0	0	Cast
P17427	0	0	0.000353971	0	0.00010599	Ap2a2
D3YV23	0	0	0	0	0.00108064	Cdk14
P17426	0	0	0.000339841	0.000114759	0.000101759	Ap2a1
A0A0U1RPN1	0	0	0	0	0.000526024	Tbc1d10b
D3YV25	0	0	0	0	0.00202895	Arf3
A0A1B0GSX0	0.00527961	0.00547842	0.0108069	0.0015529	0.00220318	Ldha
G3X9V7	0	0.000113609	0	0.000206102	0	NoName
P63321	0	0	0	0	0.000965229	Rala
D3Z6Q9	0.00476376	0	0.000678988	0.000229283	0	Bin2
Q6PBC0	0	0.00191638	0	0.000869141	0	Cds2
S4R1E5	0	0	0	0.00142827	0.000633239	Gpx4
P63328	0	0.000474498	0	0	0.000190823	Ppp3ca
E0CYV0	0.000370229	0.000432191	0.000870695	0.00117608	0.000695235	Pcmt1
Q91X72	0.000230186	0.000537421	0	0	0.000432255	Hpx
A0A087WRA1	0	0.000572253	0	0	0	Actr3
A0A1D5RM20	0.0105184	0.0204647	0	0	0	Acta1
E9Q7Q3	0	0.00149524	0.00334703	0.00226047	0	Tpm3
F7D3N3	0	0.000374566	0.000251534	0	0.000602537	Phyhipl
A3KGC5	0	0.000337723	0.000453586	0.000612673	0.000271635	Pak3
Q9Z2U0	0	0	0	0	0.000400881	Psma7
P05213	0	0.000274073	0.00276074	0.00124301	0.00176352	Tuba1b
E0CZ72	0	0.000166362	0	0.000150901	0	Kif2a
A0A087WRA7	0	0	0	0	0.000680949	Ppp1r7
P05214	0	0.000274682	0.00276687	0.00124577	0.00176744	Tuba3a
Q9D358	0.000670161	0	0	0	0.00125846	Acp1
E0CZ78	0	0.000471782	0	0	0.00018973	Ppp3cb
Q8CDV7	0	0	0	0	0.00018445	Entpd1
D3YYZ2	0.019962	0.00709219	0	0	0	Gm5239
Q920E5	0	0.000350161	0.00117573	0	0.000281639	Fdps
Q9D593	0.00093704	0.000546933	0	0	0	Atp6v1e2
Q06138	0	0	0	0	0.0005831	Cab39
Q7M6Y3	0	0.000187283	0	0.00067951	0.000301268	Picalm
H3BKD0	0	0	0	0.000374981	0	Hnrnpk
A0A1C7CYV0	0	0.000196513	0.000263931	0.00053475	0.000790291	Pls3
P62482	0	0.000336803	0	0	0	Kcnab2
P63330	0	0.000800044	0.00107451	0.000362845	0.000965229	Ppp2ca
Q8K183	0.000678753	0.0015847	0.00345859	0.00107807	0.000318649	Pdxk
Q9Z130	0	0	0	0	0.000330294	Hnrnpdl
A0A0R4J0X5	0	0	0.00140689	0	0	Serpina1c
Q9WVE8	0	0	0	0	0.00040913	Pacsin2
A0A0G2JE82	0	0.000515028	0	0	0	Fdps
A0A1L1SUR7	0.00131046	0.000305957	0	0.00111009	0.000492171	Picalm
D3YUS0	0	0	0.000768576	0	0	Dpysl3
D3YUS2	0	0.00108905	0	0	0	6430548M08Rik
P51125	0	0.000156861	0	0	0	Cast
A0A1L1SSN6	0.017447	0	0	0	0	Pkm
D3Z2K3	0.00814504	0.015847	0	0	0	Actg2
P56812	0	0	0	0	0.000789036	Pdcd5
E9Q7S0	0	0	0.000507296	0.000599568	0.0006076	Synj1
F6YCM8	0	0	0	0.000235051	0	Slmap
P63101	0.0190162	0.0322891	0.00474321	0.0128136	0.0121737	Ywhaz
P61161	0	0	0.000210676	0	0	Actr2
Q99104	0	0	0	6.05069e-05	0.000107306	Myo5a
Q9CZD3	0	0.000169557	0.000569316	0.000461396	0.00122739	Gars
P62492	0	0	0	0.000519071	0	Rab11a
E9Q606	0.0105886	0.0206011	0	0	0	Actb
A0A0J9YUE9	0.00126809	0.00118426	0.000795269	0.000805647	0.000595321	Dnm1
A2AEX6	0	0.000400022	0	0.000725691	0.000643486	Fhl1
E9Q1G1	0	0.00204309	0	0	0	Aldh7a1
E9Q3K3	0	0.000368975	0	0	0	Agap1
Q9Z0S1	0	0	0	0.000364023	0.000322788	Bpnt1
Q91V12	0.000833744	0.00129771	0.000217864	0.0011771	0.00130471	Acot7
P62259	0.00249142	0.0310229	0.00162757	0.00439683	0.00467852	Ywhae
A2AEX7	0	0.000588604	0	0.0010678	0.000946844	Fhl1
Q9Z140	0	0	0	0.000201291	0.000178489	Cpne6
A2AEX8	0	0.00041759	0	0.000757562	0.000671747	Fhl1
P04344	0	0	0	0.000640681	0	Crygb
A3KGC3	0	0.000797463	0	0	0	Pak3
E9Q1G8	0	0	0	0.000513131	0	43350
A3KGC4	0	0.000633881	0	0	0	Pak3
A2AEY2	0	0.000382683	0	0.000694237	0.000615595	Fhl1
A2AEY1	0	0.000528234	0	0.000958284	0.000849731	Fhl1
A0A0U1RQ06	0	0.00134355	0	0	0	Ap2s1
O55091	0	0	0	0.000705152	0	Impact
A2ARR7	0	0.000234994	0	0	0	Gm14412
Q9CZC8	0	0	0.00160399	0.0013541	0	Scrn1
Q9DB05	0	0	0	0	0.000674024	Napa
Q5UE59	0	0.000912227	0	0.000413724	0	Klc1
P14152	0.0206065	0.00407088	0.0111835	0.00436392	0.00238128	Mdh1
A6X925	0.0030253	0.00706324	0.00474321	0.00640681	0.0066279	Ube2v2
Q5SXA4	0	0	0	0	0.000215192	Tom1l2
B7ZCI2	0	0.0001219	0	0	0	Nebl
Q80TL4	0	0.000309017	0	0.000280298	0	Phf24
E9Q1H3	0	0.00153549	0	0	0	Aldh7a1
Q8K0U4	0.00345108	0.00292994	0.000983778	0.00182713	0.00117829	Hspa12a
Reverse_tr|A0A1L1SQ92|A0A1L1SQ92_MOUSE	0	0.000441453	0	0	0	NoName
Q6PHN9	0	0.000614959	0	0.00167342	0.000989239	Rab35
P05201	0	0.00029929	0.00743639	0.00135738	0.000962892	Got1
P05202	0.000984981	0.000574915	0	0.00234668	0.00138724	Got2
B1AWE1	0	0.000537421	0.000721793	0.000487475	0.000432255	Clta
Q3UHX2	0	0.00204873	0.00275159	0.00185833	0.0021971	Pdap1
B1AWE0	0	0.000572253	0.000768576	0.000519071	0.000460271	Clta
Reverse_tr|S4R284|S4R284_MOUSE	0	0	0.000264351	0	0	NoName
A0A1L1SST0	0.0278289	0.0190164	0	0	0	Ppia
Q3TPJ8	0	0.00019558	0	0	0	Dync1i2
E0CZ27	0	0	0	0.000942178	0.00083545	H3f3a
Q3TU36	0.00209674	0.000407943	0.00068487	0.00037003	0.000984342	Rap1gds1
D3YWY5	0	0	0	0	0.000776708	Aamdc
A0A1L1SQP9	0	0.000133918	0	0	0	Tln2
Q6PDL0	0	0.000502466	0	0.000455769	0	Dync1li2
Q80W82	0	0.000292907	0	0	0	Mapk10
Q9QY76	0	0	0.00102477	0	0	Vapb
D3Z2M9	0	0.000777401	0	0.000705152	0	Dctn1
P42669	0	0	0.00103435	0	0.00123886	Pura
O35685	0	0.00223386	0.000250019	0.00101313	0.00179672	Nudc
Q9CVB6	0	0	0	0	0.000331395	Arpc2
P40240	0	0	0.000367284	0.000496103	0	Cd9
B7ZCF1	0	0.000274073	0	0	0	Psmc3
F6U6Z2	0	0.000583051	0	0	0	Phyhipl
contaminant_GR78_MOUSE	0	0	0	0.000171174	0	NoName
E9Q3M3	0	9.77902e-05	0	8.87019e-05	0.000157308	Dctn1
A0A0G2JE52	0.0139849	0.0023322	0.00417641	0.000705152	0	Rap1a
P84228	0	0	0	0.000824406	0.000731019	Hist1h3b
A2ARP8	0.00115933	0.0015174	0.000991448	0.00141358	0.00135241	Map1a
P70297	0	0	0	0.000204597	0	Stam
P70296	0	0.0436259	0.00665825	0.00659525	0.00159495	Pebp1
B1AWD8	0	0.000523757	0.000703443	0.000475081	0.000421265	Clta
Q9CR95	0	0.000449479	0.000603682	0.000407706	0	Necap1
Q9D394	0	0.000263554	0.000353971	0.00047812	0.00084792	Rufy3
P97315	0	0	0	0	0.000515122	Csrp1
Q99PT1	0.000519047	0	0.000813787	0.000549604	0.000974692	Arhgdia
B1AWD9	0	0.000498414	0.000669405	0.000452094	0.000400881	Clta
Reverse_sp|P28271|ACOC_MOUSE	0.000119106	0	0	0	0	NoName
P54822	0	0.000255386	0	0	0	Adsl
A0A0G2JDU7	0	0	0	0	0.000299453	Fscn1
A2AEW5	0	0	0	0	0.000204987	Gripap1
Q8C266	0.000452502	0	0	0	0.000424866	Rab5c
A2AEW8	0	0	0	0	0.00011878	Gripap1
A2AEW9	0	0	0	0	0.000125529	Gripap1
P62204	0.00426385	0.00165915	0.0245119	0.00752478	0.00533791	NoName
A2AEW6	0	0	0	0	0.00021198	Gripap1
Q561M1	0.000670161	0	0	0	0.00125846	Acp1
A0A0A6YXK7	0.000134543	0	0	0	0	Cep170
P32848	0	0.00337109	0	0	0.000903805	Pvalb
D3YV81	0	0	0	0.000396181	0	NoName
D3YUW2	0	0.000305202	0	0.000553675	0	A830010M20Rik
P97765	0	0	0.00159016	0	0.00114274	Wbp2
Q9CQW1	0	0	0	0	0.000502114	Ykt6
O55042	0.0355473	0.00618034	0.00948643	0.00320341	0.00923172	Snca
P16125	0.00158511	0.00222048	0.005716	0.00134275	0.00178596	Ldhb
P63300	0	0.00561849	0	0	0	Selenow
Q8VHH5	0	0.000271663	0	0	0	Agap3
P62696	0	0	0.00161963	0.00164077	0.000484969	Crybb2
Q8BJH1	0.00686295	0.000763005	0.000512384	0.000346047	0.00153424	Zc2hc1a
A0A0J9YUI1	0	0	0	0.000806613	0	Ube2k
P84244	0	0	0	0.000824406	0.000731019	H3f3a
Q9DCX2	0	0.00153549	0	0.000696393	0	Atp5pd
F6W8Z8	0.00411569	0	0	0	0	Dnm1
E9Q1K3	0	0.000187283	0	0.000169878	0.000301268	Add1
Q99JF8	0.000200541	0	0	0	0	Psip1
Q91X97	0.00658355	0.00448315	0.00172034	0.00232371	0	Ncald
A0A0G2JE32	0	0	0.000628835	0	0.000753171	Ube2d3
P53994	0	0	0	0	0.000937911	Rab2a
Q9CQV8	0.0172172	0.0321579	0.0057362	0.00410192	0.00808281	Ywhab
P30416	0.0025431	0.000539767	0.00362473	0.000734405	0.00217071	Fkbp4
Q60932	0	0	0.00112171	0	0	Vdac1
D3Z794	0	0	0	0.00157914	0.00280052	Sumo2
Q9EQP2	0	0	0	0	0.000183768	Ehd4
D3Z313	0	0.0011237	0	0	0	Cbx3
Q3TS02	0	0.000251745	0.000845277	0.000228349	0	Acly
Q9CQV6	0	0	0	0	0.00636279	Map1lc3b
Q9QXY6	0	0	0	0	0.000371658	Ehd3
P50247	0	0	0	0	0.000460271	Ahcy
S4R1B8	0.00487339	0	0.000694613	0.000234559	0	Bin2
O35215	0	0	0.00281377	0.00190033	0.00168506	Ddt
A0A0U1RNF2	0.000318932	0	0.000250019	0	0	Lcmt1
Q8BLK3	0.000931544	0	0	0.000986386	0	Lsamp
E9Q419	0	0	0	0	0.00044186	Grk2
P09602	0	0.00137341	0	0.00373731	0	Hmgn2
Q8C483	0.00079019	0.00138366	0.000309725	0.00167342	0.00111289	Sars
A0A0N4SW07	0	0.000965678	0	0	0	Atp6v1e1
Q78JW9	0	0	0	0	0.000270159	Ubfd1
A0A140LIT9	0.00180743	0.00228576	0.00153497	0.0084528	0.00721244	Map6
Q07076	0	0.000533938	0	0	0	Anxa7
A2A4P4	0	0	0.000305732	0.000206481	0	Gm27029
A0A1L1SSX7	0	0	0	0	0.000342823	Lztfl1
D6RHQ2	0	0	0	0	0.000345203	Entpd1
Q64669	0	0.00045112	0	0	0.000362841	Nqo1
Q9D8Y0	0	0.000515028	0	0.000467163	0.00248546	Efhd2
A0A0G2JEB3	0	0	0.00184458	0	0.00044186	Fdps
Q61151	0	0	0	0.000240084	0	Ppp2r5e
Q922B2	0	0.00049344	0	0.000223791	0	Dars
Q9Z0H8	0	0.000118058	0	0	9.49557e-05	Clip2
A0A0A6YW67	0.0316281	0.011237	0.0204821	0.0145609	0	Gm8797
A2A4P3	0	0	0.000316214	0.00021356	0	Gm27029
Q9DCN2	0	0	0	0.000744978	0	Cyb5r3
P12382	0	0.00031694	0	0.000143743	0.000509839	Pfkl
O55013	0	0	0	0	0.000552325	Trappc3
O35643	0	0	0.000176047	0.000237793	0.000105428	Ap1b1
A0A0A6YVU0	0	0	0	0.000800852	0	Atp6v1h
Q9EQF6	0.00206514	0	0.000294348	0.000198793	0.000352548	Dpysl5
E9Q9M0	0	4.98615e-05	0	0	0	Cep290
F7BQW7	0	0	0.000501548	0.000592775	0.000600716	Synj1
Q9D519	0	0	0.0007125	0.000481198	0	4930524N10Rik
D3Z6I8	0	0.0015013	0.00336058	0.00226962	0	Tpm3
Reverse_tr|A2ARP8|A2ARP8_MOUSE	0	0	0	0	3.29856e-05	NoName
P62631	0.00640344	0.00186878	0.0034063	0.00217942	0.00343563	Eef1a2
Q91YR1	0	0	0	0	0.000284053	Twf1
P62874	0.00186857	0.000727099	0.00390618	0.00131905	0.000584815	Gnb1
Q5M8M8	0	0	0	0.000700745	0	Rpl29
G3UYE5	0	0.00060296	0	0.000273462	0	Paip1
E9Q9M2	0	0	0	0	0.000595321	Cdk14
G3UYG0	0.0120324	0.0234104	0	0	0	Actg1
P58389	0.00393383	0	0	0.000694237	0.000615595	Ptpa
Q8BH80	0.00261446	0.00101734	0.00102477	0.000922792	0.00245478	Vapb
A0A0J9YUN4	0.00122553	0.00114451	0.000768576	0.000778606	0.000575339	Dnm1
Reverse_sp|Q8C963|CC159_MOUSE	0	0.000300746	0	0	0	NoName
Q8CI71	0	0	0	0	0.000103131	Vps50
Q9JKK7	0	0.000352156	0	0.000638856	0.00141622	Tmod2
Q64433	0	0.00727099	0.000813787	0	0	Hspe1
Q9D8X2	0	0.00113923	0	0	0	Ccdc124
Q61166	0	0	0.00278752	0	0.000370965	Mapre1
Q5SV64	0	6.15878e-05	0	0	4.95359e-05	Myh10
O55023	0	0.000446234	0.00239729	0.000404763	0.000717824	Impa1
P62880	0	0	0	0.000329762	0.000584815	Gnb2
P62881	0	0	0	0.000283846	0	Gnb5
O55022	0.000543003	0.00126776	0.000851346	0.00057497	0	Pgrmc1
Q9QXS6	0	0	0	0.000317618	0	Dbn1
Q3UM45	0.000879935	0	0.000919737	0.000621159	0.000275398	Ppp1r7
Q5M8N0	0.00129129	0	0	0	0.00121242	Cnrip1
D3YYR8	0	0.000521547	0	0	0	Trf
Q68FL4	0	0	0	0	0.000162184	Ahcyl2
P24369	0.00294126	0.000572253	0	0.000519071	0.000460271	Ppib
Q9R1C6	0	0	0	0.000198793	0	Dgke
Q8CDN6	0	0	0	0	0.000688018	Txnl1
Q9CWW6	0	0.00188713	0	0	0.0037946	Pin4
E9Q5F4	0.00599352	0.011661	0	0	0	Actb
Q4VAA2	0	0.00175953	0.000590792	0.001596	0.000707605	Cdv3
A0A0U1RPX4	0	0	0	0.000334684	0.000296772	Mapk3
Q3TZT4	0	0.000294302	0	0	0.000236711	Inpp5a
Q9DCL8	0	0.00240013	0.000805886	0.000544268	0	Ppp1r2
P35235	0	0.000621139	0	0	0.00016653	Ptpn11
A0A0A6YXW8	0	0.00257514	0	0.00116791	0	Ak1
P15864	0.00049946	0	0	0.00370205	0	Hist1h1c
E9Q5F6	0.0131698	0.00430471	0.00784636	0.00557807	0	Ubc
Q9DCL9	0	0	0	0	0.000467852	Paics
E0CZA1	0	0	0	0.000563413	0	Cct5
Reverse_tr|D6RGS0|D6RGS0_MOUSE	0	0	0	0.000261961	0	NoName
F7BA91	0	0.00176581	0.0011858	0	0	Psmd5
A2AGT5	0	0.00018249	0	0	4.89265e-05	Ckap5
Q00898	0.00205105	0.00059858	0.00140689	0.000271475	0.000962892	Serpina1e
Reverse_sp|E9QAF0|SPT31_MOUSE	0	0	0	0	9.80459e-05	NoName
Q00897	0	0.00059858	0.00140689	0	0.000722169	Serpina1d
Q00896	0	0.000600033	0.0014103	0	0	Serpina1c
Q8CDM9	0	8.51286e-05	0	0	0	Tln2
Q9CQJ6	0	0	0	0.00113252	0.00150634	Denr
Q6PFA2	0	0.000567003	0.000761525	0.000514308	0.000456048	Clta
H3BK96	0	0	0	0.000437966	0	Hnrnpk
Q9D0F9	0	0.000659823	0.00265856	0.000798002	0.00106141	Pgm1
F6SBE4	0	0.000482839	0	0.000437966	0	Phf24
B2M1R6	0	0	0	0.000254816	0	Hnrnpk
P62897	0.0262193	0.00353162	0.00553375	0.00320341	0.0066279	Cycs
Q3UUG6	0	0	0	0.000199856	0	Tbc1d24
A2ARJ0	0	0	0	0.000541639	0	Stam
A0A0G2JEA5	0	0	0.000481475	0	0.000115335	Gm43738
Q3UYN2	0	0	0	0.000201653	0.00017881	Cpne6
E9Q7K1	0	0.0017914	0.000400996	0.00108328	0.00192113	Guk1
Q8VD37	0	0.000306717	0	0.000139106	0.000370044	Sgip1
A0A0U1RQ87	0	0	0	0	0.00168506	Pak1
A2CEK3	0	0.000639345	0	0.000773236	0	Pgm2
Q8C845	0	0.000515028	0	0.000467163	0.00248546	Efhd2
Q8C605	0.00229599	0.000315323	0.000635252	0.000286018	0.000380428	Pfkp
A0A0A6YY91	0	0.000113505	0.000533557	0.000411825	0	Ncam1
A0A1D5RM94	0	0.000525986	0	0.000477103	0	Dync1li2
A0A0J9YUL3	0	0	0	0.000259535	0	43354
A0A1B0GSR9	0.0060506	0.00627844	0.0123851	0.00177967	0.00252492	Ldha
A0A087WP80	0.000894807	0	0	0.000947486	0	Lsamp
Q06185	0	0.00174094	0	0	0	Atp5me
P56399	0	0.000144064	0	0	0	Usp5
E9PY16	0	0	0.000221942	0	0.00053165	Adap1
P62838	0	0	0	0	0.000676317	Ube2d2
A0A1B0GR11	0	0.000647156	0.000651881	0.000880517	0.00156155	Taldo1
Q9D0M5	0	0.00138884	0.0410368	0.0201563	0.00670237	Dynll2
D3YZ62	0	0	0	6.13344e-05	0.000108773	Myo5a
Q62048	0	0.00475411	0	0.000862456	0.000764758	Pea15
Q8BLF1	0	0.000302958	0.000203447	0	0.000243673	Nceh1
D3YZ66	0	0.001322	0	0	0	Osbpl1a
Q80TK0	0	9.02898e-05	0	0.000163797	0	Kiaa1107
P68134	0.00421295	0.00819674	0.00110088	0.00297399	0	Acta1
Q6P3A9	0	0	0	0	0.000564878	Arl11
Q8K0T0	0	0	0	0	0.000254919	Rtn1
Q99LD8	0.0092882	0.000867416	0.00262125	0.000393401	0.00104651	Ddah2
F7D432	0.000390721	0.000456113	0.000918888	0.00124117	0.000733716	Pcmt1
P31938	0	0.000943563	0.00316818	0.00256762	0.000505947	Map2k1
P62835	0.0126602	0.00201533	0.00360897	0.000609344	0	Rap1a
Q8K394	0	0	0	0	8.8137e-05	Plcl2
P61982	0.0120032	0.0315272	0.00302452	0.00680886	0.00764758	Ywhag
A0A0J9YV30	0.00024973	0	0	0	0	Pxn
Q9ESN6	0	0	0.000334703	0	0.000267254	Trim2
P06745	0.0185964	0.00465187	0.00833037	0.0239107	0.00481058	Gpi
Q91WQ3	0.000200541	0	0.00110046	0.000424694	0.000941464	Yars
F8WJK8	0	0	0.00435668	0.000309722	0.000823911	St13
A0A0G2JGC8	0.00233571	0.000454437	0.000762925	0.000412203	0	Rap1gds1
Q9CR16	0.000858531	0	0.00112171	0.000909075	0.0010748	Ppid
G3XA25	0	0	0.000454829	0	0	Acat2
P26350	0	0	0	0.00101008	0	Ptma
D3YZ72	0	0.0016264	0	0	0	Cplx1
Q64475	0.00336144	0	0.00131756	0.0115679	0.00236711	Hist1h2bb
P70696	0.00333498	0	0.00130718	0.0114768	0.00234847	Hist1h2ba
Q9Z0E0	0	0.000339113	0	0	0.000272753	Ncdn
A0A0J9YV32	0	0	0	0.000301396	0	Gm43796
Q9Z2I2	0	0	0	0	0.000920542	Fkbp1b
P16546	0	0.000300016	3.35786e-05	0.000362845	0.000201089	Sptan1
Q64478	0.00336144	0	0.00131756	0.0115679	0.00236711	Hist1h2bh
A9JEI5	0	0.00060296	0	0	0	Tollip
D3Z4J3	0	0	0	6.04416e-05	0.00010719	Myo5a
P61750	0	0	0	0	0.000552325	Arf4
Q00623	0	0.000468207	0	0.000424694	0.000753171	Apoa1
Q80TJ1	0	0.000456113	0.000245037	0.000248234	0.000220115	Cadps
Q8BTU6	0	0	0	0.000309722	0	Eif4a2
Q3TJ56	0	0.000203301	0	0.000184407	0	Snd1
Q80XR6	0	0	0	0.000360512	0	Hnrnpab
D3Z2F8	0	0	0	0	0.00060993	Arpc3
Q8K0S0	0	0.000374566	0.000251534	0	0.000602537	Phyhip
D3Z2F7	0	0	0	0	0.000617507	Arpc3
Q9CR09	0	0	0.00248522	0.00134275	0.00178596	Ufc1
P01027	0	0	4.99135e-05	0	5.97827e-05	C3
Q6IRU5	0	0.000539767	0.000724945	0.000489604	0.000434142	Cltb
Q91Z61	0	0	0	0	0.000502114	Diras1
P28740	0	0.000175329	0	0.000159034	0	Kif2a
Reverse_tr|K4DI77|K4DI77_MOUSE	0	6.39125e-05	0	0	0	NoName
Q9WV92	0.000113978	0.000399161	8.93501e-05	0.000362064	0.000642101	Epb41l3
E9PY39	0	0.000666344	0	0.000604416	0.000803924	Gm20431
P49443	0	0.000647156	0	0	0	Ppm1a
A0A1L1SQV8	0.0164207	0	0	0	0	Pkm
P49442	0	0.00187283	0	0	0.000251057	Inpp1
A0A0A6YW07	0	0.000594263	0.00319255	0.000539035	0.000955948	Impa1
Q62261	0	0.000104619	3.51275e-05	9.48957e-05	0.000252438	Sptbn1
E9QJT5	0.00134886	0.00157461	0.00158611	0.00142827	0.00253296	Acyp1
A0A0A6YY47	0	0	0.000685193	0.000528864	0	Ncam1
Q9Z0F7	0.0783381	0.059291	0.106626	0.0711	0.0784033	Sncg
P35278	0.000490211	0	0	0	0.000460271	Rab5c
Q5SUV1	0	0.000279653	0	0	0	Rsad1
D3YWS3	0.0134763	0.00337109	0.000754602	0.00101927	0.00180761	Pfn2
D3Z703	0	0.00138884	0.00746123	0.00125977	0	Impa1
Q9DD18	0	0.00059142	0	0.000536456	0	Dtd1
Q00612	0.000205603	0.000240013	0.000161177	0.000653122	0	G6pdx
Q3TGS9	0	0.000313723	0	0.000284567	0.000252331	Arfgap1
P28738	0	0.000387887	0	0.000234559	0.000415977	Kif5c
Q99NF7	0	0	0	0.000235051	0	Ppm1b
Q9D0J8	0.00419349	0.00367149	0	0.00111009	0.00196868	Ptms
G3UWI9	0	0	0	0.00136731	0.00242484	Sumo3
Q9CWZ7	0.00712691	0.00118853	0.00159627	0.000718713	0.00159325	Napg
Q7TS64	0	0	0	0	0.000153661	Grk2
Q8CI94	0	0.000439882	0	0.000266001	0.000235869	Pygb
Q91YS7	0	0	0.000830062	0.000280298	0.000248546	Map2k2
Q9DAK9	0.00256175	0	0.00133881	0	0.00320705	Phpt1
Q8BGY2	0	0	0	0.00146561	0.00194938	Eif5a2
Q9JII6	0.00195481	0.000380328	0.00102162	0.00172491	0.000305903	Akr1a1
Q8CG50	0	0	0	0.0016017	0	Rab43
Q9JKM7	0	0	0	0.00150833	0	Rab37
Q08331	0.0550917	0.0378574	0.038287	0.0277195	0.0377864	Calb2
F6Q609	0	0	0	0.000366403	0	Cct3
P13020	0	0.00031694	0	0	0.00012746	Gsn
Q9CQM9	0.000628401	0	0	0	0	Glrx3
D3Z2H9	0	0	0.00334703	0	0.00200441	Tpm3-rs7
Q9D2M8	0.00219073	0.00511476	0.00343474	0.00463942	0.00479952	Ube2v2
P62869	0	0.00104751	0.000703443	0.00190033	0	Elob
O88342	0	0.000407943	0.000273948	0.00037003	0.000492171	Wdr1
Q5SXR6	0.0010721	7.36193e-05	0.000593255	0.000133555	0.000296065	Cltc
A0A0N4SV66	0	0	0	0.00177967	0	H2afj
B7ZBY7	0	0.00142898	0	0.00129618	0.00172402	Ube2v1
O08547	0	0	0.00347468	0	0.000462412	Sec22b
Q05CK8	0	0	0.00166012	0	0.00198837	Ube2d3
O08788	0	9.64924e-05	0	8.75248e-05	0.00015522	Dctn1
O08553	0.00814504	0.00367363	0.00348278	0.00372424	0.0059095	Dpysl2
F8WGR0	0	0.000186436	0	0.000169109	0.000299905	Add1
A2AQA9	0	0	0	0	1.43897e-05	Neb
Q9Z1B3	0	0	0	0	8.17587e-05	Plcb1
Q8CAA7	0.000682032	0.000199045	0.000668327	0.000361092	0.000960566	Pgm2l1
P43274	0.000483495	0.00112883	0	0.0025598	0.000453966	Hist1h1e
P43275	0	0.000580313	0	0	0	Hist1h1a
P48722	0	0.000295004	0	0.000668969	0.000474552	Hspa4l
W4VSN7	0	0	0	0.000700745	0	Gm3550
P20152	0	0	0	0.000240599	0.000640034	Vim
P48962	0.00106596	0.00124436	0.000835633	0.0018812	0.00100086	Slc25a4
P43277	0.00047912	0	0	0.00355129	0	Hist1h1d
S4R270	0.00461283	0	0.000657475	0.000222018	0	Bin2
H3BKT5	0	0	0	0	0.000246086	Ahcyl2
Q99K51	0	0.000196201	0.000263512	0.000533901	0.000789036	Pls3
Q8BK64	0	0	0	0	0.000294138	Ahsa1
P61957	0	0	0	0.0011802	0.00209302	Sumo2
Q61206	0	0	0	0.000489604	0.00694628	Pafah1b2
Q99LX0	0	0.00130801	0.00570942	0.00652546	0.00157807	Park7
Q8BQB5	0	0.000832369	0	0	0	6430548M08Rik
G3UZ07	0.00592643	0.0115305	0	0	0	Actg1
Q8BJU0	0	0.000392402	0	0.000355934	0	Sgta
P62806	0	0	0	0.00108854	0	Hist1h4a
Q6GT24	0	0	0.000370564	0.00100106	0.0013315	Prdx6
E9Q1V0	0	0.00670734	0.0122257	0.000869141	0.00231206	St13
A0A087WS46	0	0	0	0.000609344	0	Eef1b2
P10126	0	0	0	0	0.00215192	Eef1a1
Q3V117	0.000577033	0.000112268	0.000376958	0.000101834	0.000270895	Acly
A3KGU7	0	0.000299411	3.35108e-05	0.000362113	0.000200683	Sptan1
Q544E8	0	0	0	0.00150833	0	Rab37
Q9WTQ5	0	7.34007e-05	0	0.000199737	0	Akap12
A3KGU9	0	0.000296894	3.32291e-05	0.000359069	0.000198996	Sptan1
A0A087WRS9	0.000524186	0	0	0.00277523	0.000492171	Idh1
G3UZ00	0	0.00134355	0	0	0.00108064	Brsk2
Q91VB8	0	0.00087047	0.0023382	0.00157914	0.00210039	Hba-a1
E9Q1V9	0	0	0.000170095	0.000689258	0.00061118	Camk2d
A0A1L1STC0	0	0	0	0.000317618	0	Cdc37
A3KGU5	0	0.000301848	3.37836e-05	0.000365061	0.000202317	Sptan1
E9Q035	0	0.000126387	0.000509241	0.000343924	0.00152482	Gm20425
A2AHQ7	0	0	0	0	8.34749e-05	Phka2
A0A1L1STC5	0	0	0	0.00243737	0	Gnb5
A2AHQ8	0	0	0	0	0.00105764	Phka2
O88447	0	0	0	0.000414489	0	Klc1
Q6ZQ38	0.000774772	0.00030148	0.000742332	0.000911538	0.000727453	Cand1
O88685	0	0.000279653	0	0	0	Psmc3
P56371	0	0	0	0.00154293	0	Rab4a
Q9CZU6	0	0	0	0.000483272	0	Cs
A2AQB2	0	0	0	0	3.26605e-05	Neb
A0A1B0GX15	0	0	0	0	0.000430383	Apoe
Reverse_sp|Q5ND34|WDR81_MOUSE	0	6.39125e-05	0	0	0	NoName
E9Q039	0	0	0	0	0.000223664	Npepps
E9PYH2	0.00082723	0.00128757	0.000216162	0.00116791	0.00129451	Acot7
P60879	0.00257004	0.0018001	0.000805886	0.00108854	0.000482614	Snap25
P56376	0.0021391	0.00249711	0.00251534	0.00226503	0.00401691	Acyp1
Q3UGC7	0	0.000473589	0	0	0.000761828	Eif3j1
P56375	0	0.0011661	0	0.00528864	0.00187582	Acyp2
Q9DBB8	0	0	0	0.000673389	0.000298554	Dhdh
E9Q1W0	0	0	0.000162122	0.000656949	0.000582531	Camk2d
A0A087WQ14	0	0.000767744	0	0	0	Actr3
Q3TLP8	0	0	0	0	0.00141353	Rac1
Q8VI64	0	0	0	0.000396181	0	Mgarp
A0A0J9YV66	0.000875087	0	0	0	0	Pxn
Q3V156	0	0.000443035	0	0	0	Osbpl1a
Q3UMP4	0	0	0	0.000838797	0.000495853	Serbp1
A2ALV3	0.00147404	0.00229432	0	0.000520275	0.00023067	Sh3gl2
F8WIX8	0	0.00395542	0	0.00179391	0.0015907	NoName
Q9D3D9	0.000630271	0	0	0	0	Atp5f1d
Q3TLQ0	0	0	0	0	0.000798543	Map2
E9Q1W3	0	0	0	0	1.39008e-05	Neb
Q9CZT8	0	0	0	0.00153588	0	Rab3b
P62814	0.00145049	0	0.00276146	0.000438823	0.000389114	Atp6v1b2
P47857	0	0.00015847	0	0.000143743	0.00012746	Pfkm
A2ALV1	0	0	0	0.00123208	0	Sh3gl2
H3BKR2	0.00232715	0.000905544	0.00486483	0.00164277	0.000728341	Gnb1
Q3TYJ3	0	0.000200335	0	0.000181717	0	Dync1i1
E9PWE0	0.000371528	0.000433708	0.00087375	0.0011802	0.000697674	Pcmt1
Q63844	0	0	0	0.000295051	0.000261628	Mapk3
P61979	0	0	0	0.000242158	0	Hnrnpk
P62827	0	0	0.000384288	0	0.000460271	Ran
contaminant_GR78_MESAU	0	0	0	0.000171436	0	NoName
P10107	0	0	0	0	0.000287337	Anxa1
Q3THG9	0	0	0.000402943	0.000272134	0	Aarsd1
E9PUA7	0	0.000637148	0	0.000577934	0	Tpd52
Reverse_tr|E9Q2Y5|E9Q2Y5_MOUSE	0	0	0	0.000233582	0	NoName
E9PWE8	0.00031006	0.00108586	0.000243064	0.000984942	0.00087337	Dpysl3
A0A0N4SV32	0	0	0	0.000929165	0.000549274	Serbp1
P68372	0	0	0.000186531	0	0	Tubb4b
P68373	0	0.000275293	0.00277304	0.00124854	0.00177138	Tuba1c
E9PYI8	0	0.000269884	0	0.000734405	0.000651213	Usp14
F8WGT1	0	0	0	0	0.000162449	Ahcyl2
Q76MZ3	0	0	0	0.000951776	0.000506376	Ppp2r1a
H3BL49	0	0	0.000169747	0.000229283	0.00040662	Cct8
P68369	0	0.000274073	0.00276074	0.00124301	0.00176352	Tuba1a
H3BJ06	0	0	0.000834233	0.00112683	0.000499591	Ap2b1
Q8R3V5	0.000264714	0	0	0	0	Sh3glb2
P0C028	0	0.0007537	0	0.000683654	0.00121242	Nudt11
Q01339	0	0	0.000481196	0	0	Apoh
P0C027	0	0.0007537	0	0.000683654	0.00121242	Nudt10
P68368	0	0.000275908	0	0	0.00110958	Tuba4a
Q9QZ06	0	0.00045112	0	0	0	Tollip
O08585	0	0.000525986	0.000706436	0.000477103	0.000423058	Clta
P62823	0	0	0	0.000493917	0.000875935	Rab3c
Q8CIN4	0	0	0.000316818	0.000213968	0.00018973	Pak2
D3Z6D8	0	0	0	0.000423091	0.000375164	Mapk3
S4R1W1	0.0305255	0.0341496	0	0.0191916	0	Gm3839
P62821	0.0165285	0.00180888	0.00121473	0.00273462	0.00242484	Rab1A
Q9CXW3	0.000924764	0.00107953	0.000724945	0.000489604	0.00130243	Cacybp
F7BHJ0	0	0.00100493	0	0	0	Cltb
O08749	0.00166421	0.00121421	0	0.000881094	0	Dld
G3UYR8	0	0.00052045	0	0	0	Aldh7a1
A0A0N4SUQ1	0	0	0	0.00228815	0.00135263	Serbp1
P63094	0	0.000313723	0	0	0	Gnas
G3UWN5	0	0	0	0	0.000428528	Apoe
Q9JLJ2	0	0	0	0.000453924	0.000201252	Aldh9a1
E9Q6B3	0	0	0	0.00130371	0	Rab11a
Q99JY9	0	0.00029571	0	0	0	Actr3
Q91XL9	0	0.000260225	0	0	0	Osbpl1a
B1AXW4	0	0	0.00134969	0.000911538	0.000808281	Prdx1
B1AXW3	0.00312962	0.0006089	0.00163559	0.00276156	0.000979493	Akr1a1
Q8BZ98	0.00122695	0.000859375	0	0.000909426	0	Dnm3
Q05920	8.98858e-05	0.000104929	0.000211391	0.00038071	8.43961e-05	Pc
B1AXW6	0	0	0.000943253	0.000637041	0.000564878	Prdx1
P63085	0	0	0	0.000313182	0.000277706	Mapk1
Q9WTL7	0	0	0	0	0.000430383	Lypla2
B1AXW5	0	0	0.000982322	0.000663427	0.000588276	Prdx1
H7BXC3	0.00126809	0	0.0417516	0	0	Tpi1
A2ALT5	0	0	0	0	0.00209302	Ahcy
P02525	0	0	0.00251534	0.00113252	0.000502114	Cryba1
D3Z6E4	0.00201687	0	0	0	0	Eno2
F8WGN6	6.50402e-05	0.000151851	0.000662826	6.88693e-05	0.00030534	Kif21a
A2AWI9	0.000283116	0	0	0	0	Sh3glb2
P49615	0	0	0.000852804	0	0	Cdk5
A2AWI7	0.000262093	0	0	0	0	Sh3glb2
Q9D5N9	0	0.000564414	0	0	0	Tex36
Q8CGP2	0.00336144	0	0.00131756	0.0115679	0.00236711	Hist1h2bp
Q8BJY7	0	0.00284153	0	0.00128873	0	Dars
Q8CGP1	0	0	0	0	0.00236711	Hist1h2bk
Q8CGP0	0.00336144	0	0.00131756	0.0115679	0.00236711	Hist3h2bb
Q8K1M6	0	0.000166586	0	0.000453312	0	Dnm1l
P11499	0	0	0.000114649	0	0	Hsp90ab1
Q9DBG3	0	0	0.000177174	0.000239315	0.000106103	Ap2b1
Q8BJY1	0	0.000490503	0.00032939	0	0.000197259	Psmd5
Reverse_sp|Q7TN83|SYT16_MOUSE	0	0	0	0	0.000155585	NoName
E9PUC5	0	0.000328741	0	0	0	Psd3
A0A1L1SVK0	0	0	0	0.000569133	0.0080746	Pafah1b2
Q8R050	0	0.00019435	0	0	0	Gspt1
A0A0A6YVZ3	0.000357721	0	0	0	0	Cep170
D3Z4B2	0.00629914	0.00105048	0.00141087	0.000635236	0.0014082	Napg
O88643	0	0	0	0.00061717	0.000364839	Pak1
P48754	0	0	0	6.18759e-05	0	Brca1
D3Z6F5	0.000421016	0.000491478	0	0.00156031	0.000988256	Atp5a1
Q8CGP6	0.00330892	0.00193136	0	0	0	Hist1h2ah
P48758	0.000764516	0.000446234	0.00119865	0.000809525	0.00251238	Cbr1
contaminant_UBIQUITIN08	0.0320443	0.00975843	0.0207516	0.0147525	0	NoName
Q9D1E6	0.00173583	0.00151976	0.00442246	0.00275703	0.00162981	Tbcb
Q8CGP5	0.00325802	0.00190164	0	0	0	Hist1h2af
contaminant_UBIQUITIN09	0.0156692	0	0	0	0	NoName
Q8BFQ8	0	0.000561849	0	0	0	Gatd1
Q8CGP7	0.00325802	0.00190164	0	0	0	Hist1h2ak
E9PUD2	0	0.000173605	0	0	0	Dnm1l
Q9CZY3	0	0.00168172	0	0.00152543	0.00202895	Ube2v1
Q61699	0	0	0	0.00026135	0	Hsph1
P99029	0	0	0.00197634	0	0	Prdx5
Q5SW16	0	0	0.0025672	0.00115587	0.00204987	Pafah1b1
Q6PIC6	0	0	0.000327764	0	9.81427e-05	Atp1a3
Q9DBF1	0	0.000458652	0	0	0	Aldh7a1
F6X9I3	0	0	0	0.000696393	0.000617507	Fkbp1a
F8WIT2	0.00126999	0.00129722	0.00149337	0.00168095	0.00149053	Anxa6
D3Z6G3	0.000796132	0.000464687	0.00312053	0.000421501	0	Mapre3
A0A0A6YW80	0	0	0	0	0.000121986	Naa15
Q9CY58	0	0	0	0.000826432	0.000488543	Serbp1
O54865	0	0	0	0.000180837	0	Gucy1b1
P02301	0	0	0	0.000824406	0.000731019	H3f3c
P22599	0	0.00059858	0.00140689	0	0.000962892	Serpina1b
Q9D819	0	0	0.00402106	0.000775912	0.00137604	Ppa1
Q6NZL0	0	0	0	0.000118645	0	Soga3
S4R232	0	0	0	0.00326561	0	Rab4b
Q6GSS7	0	0.00380328	0	0.00172491	0.00152952	Hist2h2aa1
O08539	0.0039617	0	0.000564668	0.000190679	0	Bin1
A0A0J9YKD4	0	0	0	0.000359356	0	Ckm
P36993	0	0	0	0.000287485	0	Ppm1b
Q91VE0	0	0	0	0.000174369	0	Slc27a4
Q3THK7	0.000152793	0.000713459	0	0.000485365	0.000286922	Gmps
G3UZ67	0	0.00130801	0	0.000593223	0	Paip1
Q8BSH3	0	0.00130571	0	0	0	Tpm1
F8VQE9	0	0.000271663	0	0	0	Agap3
Q564E2	0.00574078	0.00595695	0.0117509	0.00168854	0.00239563	Ldha
G3UZ60	0	0	0	0.00149492	0.00265116	Gm49325
P58771	0	0.00130571	0	0	0	Tpm1
P60840	0	0.00204309	0	0	0.000821641	Ensa
F8WIS9	0	0	0.000169747	0.000687848	0	Camk2a
P60843	0	0	0	0.000276156	0	Eif4a1
A0A0N4SUN8	0	0	0	0.00217005	0.00128282	Serbp1
O08709	0	0	0.000370564	0.00100106	0.0013315	Prdx6
D3Z442	0	0	0	0	0.000715242	Aamdc
Q9R1R2	0	0	0	0	0.000133627	Trim3
A3KGL9	0	0.00128757	0	0.00350373	0	Hmgn2
O35098	0	0.000216096	0.000145116	0.000392025	0	Dpysl4
D3Z444	0	0	0	0.00224238	0	Rab43
I7HJR3	0	0	0.001078	0	0	Apoh
F6VQH5	0	0	0	0	0.000307797	Hnrnpdl
Q3UT23	0	0.000506585	0	0	0	Dcun1d1
A0A0G2JFT8	0	0.000184763	0.00024815	0.000335185	0	Rufy3
P63044	0	0	0	0.00289964	0.000857057	Vamp2
Q8R1M2	0	0	0	0.00173828	0	H2afj
F6QYF8	0	0	0	0	0.000226983	Npepps
Q61838	0	0	0	0	0.000133001	Pzp
Q6P1J1	0	0	0	0.000653756	0	Crmp1
P07356	0.00093704	0.00583395	0.00342799	0.00198441	0.00263943	Anxa2
D3YYA5	0	0.00059142	0	0	0	Usp5
Q8BNU1	0	0	0	0.0017074	0	Rab26
D3Z5X0	0	0	0	0.00135083	0.00119781	Bpnt1
Q02053	0	0	0	0.000423891	0.000375874	Uba1
P63054	0	0.00797463	0	0.00542512	0.0208458	Pcp4
O88844	0.000255762	0.000895701	0.00120299	0.0013541	0.000240141	Idh1
Reverse_tr|K7N702|K7N702_MOUSE	0	0	9.7197e-05	0	0	NoName
H3BKM0	0	0	0.000181832	0.000245606	0.000108892	Ap2b1
Q5SVG4	0	0	0.000179862	0.000242945	0.000107712	Ap1b1
Q5SVG5	0	0	0.000181236	0.000244802	0.000108536	Ap1b1
A0A0A0MQF6	0.0283148	0.0316764	0.0113295	0.0178017	0.0279701	Gapdh
P29595	0.00261446	0.00457803	0.0030743	0.00138419	0.00490956	Nedd8
H3BKI8	0	0	0	0.000629883	0	Hnrnpk
A0A0R4J1E3	0	0	0	0.000339241	0	Dbn1
A0A1L1SRD0	0	0	0	0.00115587	0.0163989	Pafah1b2
O08972	0.0108489	0.00101317	0.00306171	0.000459505	0.00122236	Ddah2
Q91ZA3	0.00204751	0.000853638	0	0.000309722	0	Pcca
A0A0G2JDN7	0	0	0.00377301	0.00298322	0	Map4
Q8VDD5	0	6.30647e-05	0	0	0	Myh9
P68510	0.003013	0.0326603	0.0057362	0.00364615	0.00484969	Ywhah
P40142	0.00101976	0.00119043	0.0014656	0.0016197	0.0015958	Tkt
Q91V92	0.000582322	0.000113297	0.000380414	0.000102767	0.000273378	Acly
A0A0A0MQG2	0	0.000118171	0	0.000107189	0	Sptbn1
E9Q447	0	0.00029929	3.34973e-05	0.000361967	0.000200602	Sptan1
A0A087WRM0	0	0.00321056	0.001078	0.00291219	0.00129115	Cdv3
Q8VHL1	0	0	0	0	0.000271635	Setd7
A0A087WRM4	0.00126054	0	0	0	0.00118355	Idh1
P85094	0	0.00120007	0	0	0	Isoc2a
Q99JI6	0.0120848	0.00201533	0.00360897	0.000609344	0	Rap1b
E9Q455	0	0.00147737	0	0	0	Tpm1
B0R1E3	0	0.00103871	0.00279013	0.00376871	0.0033418	Hint1
E9Q454	0	0.00129206	0	0	0	Tpm1
E9Q452	0	0.00131965	0	0	0	Tpm1
A0A087WPH7	0	0.000405268	0	0	0	Psmc3
Q04447	0.0105608	0.0035687	0.00501087	0.00441414	0.00339223	Ckb
O54833	0	0	0	0	0.000284053	Csnk2a2
Q91V89	0	0	0.000139741	0.000377506	0.000167371	Ppp2r5d
E9Q3T7	0	0.000290839	0	0	0	Adsl
Q99LU0	0.000532088	0	0	0.000563413	0	Chmp1b1
Q5SVJ1	0	0	0.000165022	0.000668703	0	Camk2b
Q61879	0	6.2554e-05	0	0	5.0313e-05	Myh10
E9QKC6	0	0	0.000323401	0	0.00025823	Trim2
Q5SVJ0	0	0	0.000124634	0.000505042	0	Camk2b
Q7TSJ2	0.00140246	0.00177361	0.00119104	0.00655885	0.00548668	Map6
A0A1D5RLE4	0	0	0	0	0.000417725	Csnk2a2
O35295	0	0.000763005	0	0.000346047	0	Purb
A0A0G2JDL9	0.0197414	0.00314254	0.00562754	0.000950163	0	Rap1a
Q6PFX8	0	0	0	0	0.000523256	Rimkla
Q9CRB6	0.0415119	0.0196647	0.035372	0.0261187	0.0146868	Tppp3
P63001	0	0	0	0	0.00155342	Rac1
E9Q223	0	0	0.00402943	0.00326561	0.00482614	Hbb-bs
A2RTH5	0.000318932	0	0.000250019	0	0	Lcmt1
Q7TQF7	0.00339574	0.000900924	0.000484001	0.000163439	0.0005797	Amph
Q29ZQ5	0	0.000594263	0	0	0	Mog
G3UWV4	0	0.000177341	0	0	0.000142638	Brsk2
F7CVJ5	0	0.00120753	0.00434935	0.00159317	0.0014127	Ahnak2
P63242	0	0.000802641	0	0.00145609	0.00193673	Eif5a
Z4YN97	0	0.00277768	0	0.00125977	0	Ak1
A0A0G2JDL3	0	0	0.000957764	0	0	Cdk5
P63005	0	0	0.000607363	0.000273462	0.000484969	Pafah1b1
P08249	0.00156635	0.0003657	0.000491161	0.00132685	0.00264724	Mdh2
P20357	0	0	0	0	0.000217546	Map2
A0A0A0MQA5	0	0.000259134	0	0	0.00104212	Tuba4a
Q61885	0	0.000502466	0	0	0	Mog
Q61644	0.000480206	0.00168172	0.000941114	0.00279662	0.00180351	Pacsin1
A0A0A0MQA3	0	0	0.00133267	0	0	Serpina1a
D3Z1T4	0	0	0	0.000596379	0.00105764	Gnb2
Q8VI36	0.000179163	0	0	0	0	Pxn
A2AS98	0	0	0	9.88706e-05	0	Nckap1
Q504M8	0	0	0	0.00129368	0	Rab26
Q8BWJ3	0	0	0	0	8.05009e-05	Phka2
P31001	0	0	0	0.00023906	0	Des
Q8VFN5	0.000344904	0	0	0	0	Olfr229
P63260	0.00423542	0.00824045	0.00110675	0.00298985	0.0103395	Actg1
O08915	0	0.000374566	0	0.000339755	0	Aip
A0A0N4SUX5	0.00162484	0.0113807	0.0125252	0	0	Eno2
P61082	0	0.00202634	0	0	0.00108654	Ube2m
Q6PE66	0	0	0	0	0.000185137	Phka2
P61079	0	0	0.000564668	0	0.000676317	Ube2d3
A0A087WRF2	0	0.000307479	0	0	0	Agap1
G3UWW1	0	0	0	0	0.00118355	Map2
P63011	0	0	0	0.000509633	0.000903805	Rab3a
P09103	0.000208027	0	0	0	0	P4hb
A0A0A6YWC8	0	0	0	0.000262574	0	Vim
P63017	0.00409774	0.00287013	0.00886599	0.00624813	0.00246238	Hspa8
F7BWP1	0	0	0.000653592	0	0	Ciapin1
Q9Z172	0	0	0	0.00101927	0.00180761	Sumo3
Q6PHZ2	0	0	0.000166345	0.000674063	0.000597707	Camk2d
D3Z1U1	0	0	0	0	0.00083545	Crybb3
D3Z263	0	0	0	0	0.00140026	Rtca
E9PYD5	0	0.000792351	0	0.000718713	0	Tcea1
P28063	0	0	0	0	0.000360212	Psmb8
Q9R1P1	0	0	0	0	0.000484969	Psmb3
Q9R1P4	0	0.00140996	0	0.000426309	0.000378017	Psma1
Q9EP69	0	0.000210574	0	0	0	Sacm1l
Q9R1P3	0	0.000614959	0	0	0	Psmb2
P63024	0	0	0	0.00326561	0.000965229	Vamp3
G3UWX9	0	0	0	0.00116791	0.00207122	Sumo3
F7BX26	0	0	0	0.000471089	0.000208863	Ppp5c
P63268	0.00422416	0.00821853	0.00110381	0.00298189	0	Actg2
A0A0G2JDJ5	0	0	0.00343001	0	0.000821641	Fdps
E9Q242	0	0.000263554	0	0	0	Adsl
Z4YL78	0	0.000188043	0	0	5.04151e-05	Ckap5
P61089	0.000696615	0.00406601	0.00491484	0.00221288	0.00392442	Ube2n
G3X8R0	0	0.00130801	0.000439186	0.00177967	0.000526024	Reep5
Q9WVJ5	0.000847084	0.000988854	0	0.00134543	0	Crybb1
Q504P4	0.00422191	0.0029571	0.00913466	0.00643747	0	Hspa8
Q7TQD2	0.00145714	0.00170101	0	0.0061717	0.0118573	Tppp
P61087	0	0	0	0.000560596	0	Ube2k
Q8BHL3	0	0	0	0	0.000124585	Tbc1d10b
Q6A065	6.66785e-05	7.7838e-05	0	0	0.000313031	Cep170
P08226	0	0	0	0	0.000319674	Apoe
P63028	0	0.00143729	0	0.000651856	0.00115603	Tpt1
Z4YKV1	0	0.000326139	0	0	0	Gnas
Q9D7H3	0	0	0	0	0.000543271	RtcA
P22752	0.00325802	0.00190164	0	0	0	NoName
A0A0A0MQC7	0.0184902	0.00438441	0.00418995	0.00504766	0.00637472	Mapt
D3YYG9	0	0.000654004	0	0.000593223	0	Dctn1
Q5SVI0	0	0	0.000160244	0.000649339	0	Camk2b
D3Z1V4	0	0.0390337	0.00595738	0.00590101	0.00142706	Pebp1
E0CXJ1	0	0.00140462	0	0	0	Phyhip
Q5SVI1	0	0	0.000140927	0.000571066	0	Camk2b
A0A1L1SRI1	0	8.40291e-05	0	0	0	Tln2
P63040	0	0.000922438	0.000619449	0	0.00296772	Cplx1
E0CXJ3	0	0	0	0	0.00084253	Eif2s2
A0A0N4SUV3	0	0	0	0.00289964	0.000857057	Vamp1
A0A1D5RLD8	0.0305255	0.0341496	0.0122141	0.0191916	0.030154	Gm10358
Q9R1Q8	0.0138343	0.00496912	0.00166847	0.00394389	0.00699427	Tagln3
E9Q1T1	0	0	0.000155734	0.000631065	0.000559579	Camk2d
P67871	0	0	0	0.000521485	0	Csnk2b
Q3TYE5	0.000939812	0	0	0.000995141	0	Lsamp
P17183	0.00146385	0.0102531	0.0112843	0.0157587	0.00847578	Eno2
P17182	0.0161024	0.0190821	0.0304101	0.0392676	0.0185551	Eno1
F7DBB3	0	0.000784307	0	0	0	Ahnak2
Q6A078	0	5.00027e-05	0	0	0	Cep290
Q5SVI2	0	0	0.000156912	0.000635837	0	Camk2b
Q5SVI3	0	0	0.000160244	0.000649339	0	Camk2b
Q9QYC0	0	0.000168172	0	0.000152543	0.000270527	Add1
P63038	0	0	0	0	0.000173505	Hspd1
Q5SVI9	0	0	0.000173291	0.000702208	0	Camk2b
F2Z490	0	0	0	0.000276156	0	Dgke
Q9Z1R4	0	0.000421866	0	0	0	D17h6s53e
E0CY49	0	0	0	0	0.00037946	Asl
E9Q939	0	0.00169324	0	0	0	Trf
F6Y616	0	0.000510772	0	0.000231651	0	Paip1
A0A1L1SU37	0.0132357	0	0	0	0	Pkm
D3YW40	0	0.000718644	0	0.000651856	0	Aip
Q6S9I0	0	0.000570932	0.000383401	0	0.000459208	Kng2
Q9D481	0	0.000436773	0	0.000396181	0	Kif2a
A0A1B0GS70	0	0.00155807	0	0.000471089	0.000417725	Psma1
A0A1B0GRV0	0	0	0	0.000347118	0.000307797	Bpnt1
A0A0A0MQM0	0	0.000829575	0	0.00150496	0.00200172	Eif5a
A8DUK4	0	0	0.00282334	0.00228815	0.00338158	Hbb-bs
A0A0A0MQM3	0	0	0	0.0015681	0	Cyb5r3
Q9WUB3	0	0	0	0	0.000118074	Pygm
Q9JM76	0	0	0	0	0.000558531	Arpc3
K4DI76	0	0.00045645	0.000245218	0.000248418	0.000220277	Cadps
Q80X68	0	0	0	0.000481198	0	Csl
P61264	0	0	0	0.000778606	0.00103561	Stx1b
Q9JLV5	0	0.000160946	0	0	0	Cul3
K3W4R2	0	6.18034e-05	0	0	0	Myh14
Reverse_sp|Q9CQD1|RAB5A_MOUSE	0	0	0	0.000521485	0	NoName
P61027	0	0.000618034	0	0	0.000497093	Rab10
Q6P6L0	0	0	0	9.91328e-05	0	Filip1l
K3W4R5	0	0.00018249	0	0	4.89265e-05	Ckap5
J3QQ30	0	0.00136834	0.000306296	0.000827448	0.00110057	Pitpna
P07758	0	0	0.00140689	0	0	Serpina1a
Q3U2G2	0.000377264	0.000293603	0.000492911	0.000798949	0.000944595	Hspa4
E9Q0C3	0	0	0.000515567	0	0	Hsp90ab1
A0A0A6YX18	0	0	0	0.000241117	0	Atp6v1h
A0A0A6YWP6	0	0	0	0.000254239	0	Atp6v1h
Q3TWS4	0	0	0	0.0017338	0	Snap91
H3BLF7	0.00588253	0.00228901	0.0122972	0.00415256	0.00184108	Gnb1
H3BJB6	0	0	0.000347306	0	0.000831955	Cct8
D3YU15	0	0.00135832	0.00136823	0.00123208	0.000546256	Ddah1
G3X8U7	0	0.000480026	0	0	0.000193046	Ppp3cb
Q5SRX1	0	0	0	0	0.000196092	Tom1l2
Q8VGC8	0.00337215	0.00118096	0.000528702	0.00142827	0.00126648	Olfr131
Q8VBZ3	0	0.000186155	0	0	0	Clptm1
A0A0R4J078	0	0	0	0.00022158	0	Ubxn4
F6W687	0	0.00110363	0	0.00300319	0	Hmgn2
E9Q6P2	0	0.000497411	0	0	0.000200037	Ppp3cb
A0A0N4SWH2	0	0	0	0.00159411	0.000942356	Serbp1
P50396	0.00758017	0.00912533	0.00148557	0.00877891	0.00289137	Gdi1
P32921	0.000660408	0.000770936	0.000862851	0.00116548	0.00144684	Wars
Q91VR7	0	0	0	0	0.00657313	Map1lc3a
P46096	0	0	0	0.000532633	0	Syt1
P07724	0.0252523	0.00874192	0.0141984	0.0132773	0.0165153	Alb
P28663	0.00248724	0.0033183	0.000835633	0.00714854	0.00133448	Napb
P28660	0	0	0	9.93965e-05	0	Nckap1
P48036	0	0.000774964	0	0.000351471	0.000934971	Anxa5
Q8R0A7	0	0.000607404	0	0.000550954	0	Kiaa0513
Q80WS1	0	0	0	0	0.000513791	Rimklb
P97447	0	0.000441453	0	0.000800852	0.000710133	Fhl1
B1AT92	0	0.0006089	0	0.000552311	0	Grb2
Q62188	0.000371528	0.00130112	0.00029125	0.0011802	0.00104651	Dpysl3
Q8C0M9	0	0.00189581	0	0.000687848	0	Asrgl1
P15105	0.00141938	0.00132554	0.000445074	0.00150294	0.00106615	Glul
Q3TWV4	0.000244539	0.000285466	0	0.000517872	0.000459208	Ap2m1
D3YTQ3	0	0	0	0	0.000236711	Hnrnpdl
B1AT95	0	0.00174094	0	0.00157914	0	Grb2
Q3UH59	0	6.14043e-05	0	0	4.93883e-05	Myh10
Q91ZZ3	0.042195	0.0288106	0.0361982	0.00758702	0.0142027	Sncb
G3UZA7	0	0	0	0.000992206	0.00175962	Sumo3
E9Q6Q4	0.00227711	0.000443035	0.000743783	0.000401861	0.00106902	Rap1gds1
F2Z460	0.00365122	0	0	0	0	Dnm3
Q99KD5	0	0.000130939	0	0	0	Unc45a
F8WIH0	0	0	0	0.000162492	0	Slmap
P28658	0	0	0	0	0.000209302	Atxn10
Q9EPJ9	0	0.000298567	0	0.000270819	0.000240141	Arfgap1
Q91XV3	0.0149926	0.0153141	0.0069784	0.0396882	0.014077	Basp1
E9QPD7	8.98096e-05	0.00010484	0.000211212	0.000380388	8.43245e-05	Pcx
Q14AA6	0	0	0.000384288	0	0.000460271	1700009N14Rik
M0QWN2	0	0	0.00163559	0.000552311	0.000489747	Map2k2
Q9D1P4	0	0	0	0	0.000300358	Chordc1
A0A1L1SU22	0	0	0	0	0.000388354	Chordc1
D3Z7V3	0	0	0	0.000141923	0	Slmap
Q8WTY4	0	0.00240013	0.000537257	0.00181423	0	Ciapin1
O35143	0	0.0011661	0	0	0	ATP5IF1
A2A5Y6	0.018378	0.00429076	0.00410044	0.00493983	0.00623855	Mapt
P18872	0.00239289	0.00279337	0.00211033	0.00126688	0.00280843	Gnao1
D3Z637	0	0.000763005	0	0.000692094	0	Tpd52
F6Q2E3	0	0.0006089	0	0	0	Psmc3
D3YTR7	0	0	0	0	0.000273128	Cap2
P61294	0	0	0	0.000539035	0	Rab6b
Q80X35	0	0	0	0	0.000853378	Map2
J3QPS8	0	0.0016264	0	0	0	Eif5a
E9Q6R3	0	0	0.00450034	0	0.000598907	Sec22b
F2Z471	0	0	0.00130718	0	0	Vdac1
A0A0R4J093	0.000466456	0	0.000731332	0.000493917	0	Cmpk1
Q91XU3	0	0	0	0	0.000236149	Pip4k2c
Q8BQX0	0	0	0	0.00155721	0	Rab37
P10711	0	0.000821307	0	0.000744978	0	Tcea1
P07309	0	0	0.001694	0.000762716	0.000676317	Ttr
A0A1L1STV8	0.0166885	0	0	0	0	Pkm
H7BX22	0	0	0	0.00293122	0.00129959	Ranbp1
H7BX26	6.71011e-05	7.83313e-05	0	0	0.000315014	Cep170
A0A1L1SRR7	0	0.000943563	0	0.00171174	0	Tmod2
A2A7Z6	0	0	0	0.00147525	0	Rab3b
P97427	0	0	0	0.00078405	0.000869043	Crmp1
P0CG49	0.0100678	0.00486322	0.00598733	0.00367604	0	Ubb
P40124	0	0.000260774	0	0.000709615	0.000419488	Cap1
Q8CHC4	0	0	0.000421887	0.000498624	0.000505304	Synj1
P61222	0	0.000206355	0	0	0	Abce1
P0CG50	0.00476052	0.00185242	0.00305336	0.00213851	0	Ubc
Q9JJV2	0.0105886	0.00264872	0.000592902	0.000800852	0.00142027	Pfn2
E9Q0G1	0	0	0	0.00123208	0	Denr
P07310	0	0	0	0.000294276	0	Ckm
F8VQ42	0	0.000184213	0	0.000167093	0	Kif2a
E9PV44	0	0.00167036	0	0	0	Atpif1
F6ZTG3	0	0.0011661	0	0.000528864	0.00140687	Glod4
P52760	0.000784337	0.00183121	0	0	0	Rida
O70325	0	0	0	0.00113827	0.000504663	Gpx4
P29341	0	0.000388701	0.000130513	0.000352576	0.000312637	Pabpc1
Q9CPV4	0	0.000829575	0	0.000376239	0.00100086	Glod4
D3YVX4	0	0.000348188	0	0	0	Smap1
D3Z7X7	0	0.000600033	0	0.000544268	0	Tpd52
D3Z656	0	0	0.000413223	0.000488385	0.000494928	Synj1
G5E884	0	0	0	0.000618305	0.000365509	Pak1
E9Q4P0	0.0126185	0.00448315	0.0081716	0.00580929	0.0103024	Kxd1
P21614	0	0	0	0	0.000208863	Gc
Q9JJU9	0	0	0	0	0.000471178	Crybb3
Q8BP47	0	0	0	0.000200571	0.000355701	Nars
Q9JHQ5	0	0	0	0	0.000332504	Lztfl1
Q9JJU8	0	0	0	0	0.000872093	Sh3bgrl
P14094	0	0.000813202	0.00081914	0.00147525	0.00065407	Atp1b1
A0A0R4J036	0	0.0023322	9.78847e-05	0.00185103	0.0021103	Nefm
Q99KI0	0	0	0.000638509	0.000431228	0.000254919	Aco2
G3X8Y3	0	0	0	0	0.000114935	Naa15
Q91VW3	0.00455422	0.00531642	0.00178508	0.00120558	0.00427607	Sh3bgrl3
E9Q2L2	0.000243415	0	0	0	0	Dlg2
F7AT44	0	0.000457803	0	0	0	Tollip
E0CY23	0	0	0	0	0.000696452	Hspa4l
F8WID5	0	0.00113749	0	0	0	Tpm1
D3YTU0	0	0	0	0.001967	0.000581395	Vamp1
A0A1D5RMM8	0.000188408	0	0	0	0	Pxn
M0QWS4	0	0	0.0044627	0.00241117	0.00320705	Ufc1
P26043	0	0.000636055	0	0.000384629	0.000852646	Rdx
contaminant_GR78_HUMAN	0	0	0	0.000171699	0	NoName
D3YVY3	0.000740458	0	0	0	0.000695235	Idh1
Q9CPU0	0	0	0.000902242	0	0.000540318	Glo1
D3Z1M1	0	0	0	0.000493917	0.000875935	Gnb2
Q80X81	0	0	0.000418167	0	0	Acat3
A2AT02	0	0	0.000244856	0	0.00087981	Nsfl1c
Q9QUR7	0	0.000749132	0.00503068	0.00271804	0.000602537	Pin1
P62331	0	0	0	0	0.000568106	Arf6
Q9D8B3	0.000472703	0	0	0	0.000887666	Chmp4b
Q8BSZ2	0.000548629	0	0	0	0	Ap3s2
F6RM14	0	0.000943563	0	0	0	Nebl
Q921J2	0	0	0	0	0.00108064	Rheb
Q99KH8	0	0	0	0	0.00023067	Stk24
A0A0G2JGX4	0	0	0.000323611	0	9.68992e-05	Atp1a3
Q3TDT0	0	0	0	0	0.000138659	Trim3
Q5RKN9	0	0.000864383	0	0	0.000695235	Capza1
A0A0G2JGZ3	0	0	0.00113707	0	0.0013619	Ube2d3
F8WIC2	0	0	0	0.001967	0	Ube2k
P28474	0.000283116	0	0.00244136	0.00119914	0.00132913	Adh5
Q9Z1Q5	0	0.000512891	0.00309982	0.00093045	0.00082505	Clic1
D3YU75	0	0.0017914	0	0.000812458	0.00144085	Tpt1
Q3U0I3	0	0.000237249	0	0.0002152	0	Cct3
Q69Z98	0	0.000168172	0	0	0.000135263	Brsk2
P54728	0	0	0	0	0.000477974	Rad23b
Q8CD76	0	0.000802641	0	0.000364023	0	Klc1
B1AQW2	0	0	0	0.00603719	0.00535331	Mapt
Q99020	0	0	0	0.000393401	0.000697674	Hnrnpab
E9PV73	0.00679479	0.00462699	0.00177553	0.00239827	0.00265825	Hpca
Q6URW6	0	6.18034e-05	0	0	0	Myh14
E9Q0J5	6.33286e-05	0.000147855	0.000645383	6.7057e-05	0.000297304	Kif21a
J3QPW1	0	0.00136331	0.00030517	0.000824406	0.00109653	Pitpna
Q9WUA3	0.00229599	0.000315323	0.000635252	0.000286018	0.000380428	Pfkp
Q921I1	0	0.000177341	0.000714544	0.000482579	0.00213957	Tf
A0A1L1SU70	0	0.000498414	0	0.000904187	0	Tmod2
Q99MK8	0	0	0	0	0.000144294	Grk2
H7BX64	0	0	0	0.00013541	0	Slmap
P07901	0	0.000843157	0.000452967	0.00107072	0.00054253	Hsp90aa1
P48453	0	0.000470883	0	0	0.000189369	Ppp3cb
Q9WTX5	0.00194881	0.00530827	0	0.0013757	0.00060993	Skp1
Q8CCM0	0	0	0.000229934	0.000931739	0.000826193	Camk2d
P16858	0.0305255	0.0341496	0.0122141	0.0191916	0.030154	Gapdh
Q9JLN9	0	0	0	0	3.9003e-05	Mtor
Q61035	0.000208027	0.000485685	0.000163077	0	0.000390643	Hars
F6S4H3	0	0	0.00296451	0	0	Gm11077
contaminant_GR78_RAT	0	0	0	0.000171436	0	NoName
Q61036	0	0.000221121	0.000296981	0.000401142	0.000177851	Pak3
A0A0A6YX86	0	0	0	0	0.000419488	Naa15
F6X9B6	0	0	0	0	0.000129451	Neb
P13595	0	0.000110858	0.000521115	0.000402221	0	Ncam1
O55131	0	0	0	0.000514308	0	43350
A2AG50	0.00040673	0.000474802	0.000106282	0.00100491	0.000763779	Map7d2
A2AG51	0	0	0.000206483	0	0	Map7d2
F6RJV6	0	0.000280287	0	0	0.00112719	Lancl2
A2AI91	0	0	0	0	8.41105e-05	Phka1
B0V2N5	0.00116785	0	0	0	0	Anxa2
Q5SW88	0.0167739	0.00183574	0.00123277	0.00277523	0.00246086	Rab1a
A0A140LHQ8	0	0.000232781	0	0.000844589	0.000374458	Picalm
Q8BFU2	0.00325802	0.00190164	0	0	0	Hist3h2a
Q8VC30	0	0.000213853	0	0.000193978	0	Tkfc
Q5PR73	0	0	0	0.000563413	0.000499591	Diras2
Q9JLM8	0	0	0	0.000296612	0.000263012	Dclk1
Q5SW86	0.0268916	0.00294302	0.00197634	0.00444918	0	Rab1a
Q5SW87	0.0245532	0.0026871	0.00180448	0	0	Rab1a
A0A0A6YX99	0.000306027	0	0	0	0	Cep170
P53810	0	0.00136834	0.000306296	0.000827448	0.00110057	Pitpna
P15532	0	0	0	0.00663864	0.00719476	Nme1
P17710	0.000326136	0.000380719	0	0.000230224	0.000306217	Hk1
P62761	0.0166312	0.00453009	0.00956093	0.00410908	0.00572568	Vsnl1
F6S2D5	0	0.000950821	0	0	0	Fkbp4
Reverse_sp|Q9DBJ3|BI2L1_MOUSE	0	0	0	0.000218131	0	NoName
A0A1D5RL96	0	7.05921e-05	0	0.000128063	0	A830010M20Rik
Q564G0	0	0.00169324	0.000379024	0.00102392	0.00181586	Guk1
H3BIY9	0	0	0.000176234	0.000238045	0.00010554	Ap2b1
A0A1L1SQ51	0	4.85876e-05	0	8.8144e-05	0.000156318	Tln2
G3UZH8	0	0.00119427	0	0.000541639	0	Paip1
Q64525	0.00336144	0	0.00131756	0.0115679	0.00236711	Hist2h2bb
P51881	0	0.000414788	0	0	0.000667239	Slc25a5
Q64524	0	0	0	0	0.00236711	Hist2h2be
E9PYP8	0.000897335	0.00104751	0	0.00142524	0	Crybb1
P26883	0	0	0	0.00103814	0.000920542	Fkbp1a
Q62348	0	0.0016264	0	0.000491751	0.000436046	Tsn
Q91ZR1	0	0	0	0.00157914	0	Rab4b
Q8C0E9	0	0.00031694	0	0	0	Psd3
G3UZJ4	0	0	0.00250019	0	0	Prdx5
A0A1L1STX7	0	0.00101317	0	0.00091901	0.00162981	Apoa1
Q8VE62	0	0.000618034	0	0.000280298	0	Paip1
G3UZJ2	0	0	0	0	0.00165698	Map2
E9QKR0	0	0	0	0.000293506	0.000520516	Gnb2
Q9QZ73	0	0.000477246	0	0	0	Dcun1d1
P51885	0	0	0	0	0.000294138	Lum
Q64520	0	0.00187283	0.000419223	0.00113252	0.00200846	Guk1
Q93092	0	0.000733571	0.000738928	0.000998094	0.00177006	Taldo1
Q64523	0	0.00383277	0	0.00173828	0.00154137	Hist2h2ac
Q68EG2	0	0	0.000152305	0.00061717	0	Camk2b
A0A0A6YWU2	0	0	0.000960403	0.000741284	0	Ncam1
Q9DBJ1	0.0187592	0.0024332	0.0163398	0.0220707	0.03327	Pgam1
F8WGL3	0.0107285	0.00381166	0.0149923	0.0217324	0.0127011	Cfl1
P26638	0.00082723	0.00144852	0.000324243	0.00175186	0.00116506	Sars
P48428	0	0.00343352	0	0.00207628	0.00552325	Tbca
P62774	0	0	0.000703443	0.000950163	0.00084253	Mtpn
V9GXM1	0	0.000291525	0	0.000264432	0.000234478	Arfgap1
D3Z1A9	0	0.00174094	0	0	0	Cbx3
Q8K212	0	0.000257246	0	0	0	Pacs1
P61205	0	0	0	0	0.000549274	Arf3
Reverse_tr|Q8BXU5|Q8BXU5_MOUSE	0	0	0	0	0.00040579	NoName
P24472	0	0	0.00112171	0.00101008	0.000447831	Gsta4
G3UXG7	0	0	0	0.000683654	0	Csnk2b
P06801	0	0.000216096	0	0.000392025	0	Me1
H7BWX9	0	0	0	0.00211546	0.00375164	Sumo2
Q91XM9	0.000248558	0	0.00185108	0.000657977	0.000816819	Dlg2
A2A860	0	0	0.00192144	0	0.00138081	NoName
P54923	0.000292501	0	0	0	0	Adprh
Q8BSL7	0	0	0	0	0.000549274	Arf2
Q01853	0	0.000153358	0	0.000139106	0.000246696	Vcp
A2AI89	0	0	0	0	8.20963e-05	Phka1
A2AI87	0	0	0	0	8.01117e-05	Phka1
A2AI88	0	0	0	0	8.12243e-05	Phka1
O55126	0.000376817	0	0	0	0.000353803	Nipsnap2
P34022	0	0	0	0.00220925	0.000979493	Ranbp1
Q7TMG8	0.000376817	0	0	0	0.000353803	Nipsnap2
A2AFS0	0.00120324	0	0.000471626	0	0	Sars
Q9D7S9	0	0.00169324	0	0	0	Chmp5
Reverse_sp|O08934|UNC4_MOUSE	0	0	0	0.000211546	0	NoName
P26645	0.000342672	0.00160009	0	0.00108854	0.000321743	Marcks
A2AFS1	0.00227711	0	0.00089254	0	0	Sars
A2A5N1	0.0266379	0.0497537	0	0	0	Ywhab
Q9WTT4	0	0.00314254	0	0.00190033	0.00252759	Atp6v1g2
P23198	0	0.000675447	0	0	0	Cbx3
S4R2K7	0	0	0	0	0.00111706	Pak1
P20918	0	0	0	0	0.000122437	Plg
A6ZI44	0.00962596	0.00946272	0.0264111	0.0327238	0.0359144	Aldoa
P17751	0.000708264	0.004134	0.0233195	0.0127493	0.0159602	Tpi1
P70349	0.000840361	0.000981006	0.00263512	0.00355934	0.00315615	Hint1
Q9DBP5	0.000540232	0	0.000847002	0.000572037	0	Cmpk1
Q3UGN9	0	0	0	0.000242682	0	Stam
O08599	0.000713034	0.000624276	0.000139741	0.00113252	0.0011716	Stxbp1
Reverse_sp|Q8CGV2|TPH2_MOUSE	0	0.000253293	0	0	0	NoName
Q61081	0	0	0.000219014	0.000295829	0.000786954	Cdc37
D3Z3G6	0	0	0	0.000295051	0.000261628	Mapk3
E9PZ43	0.00351817	0.000927382	0.00364765	0.0028841	0.0012787	Map4
Q8BZA9	0	0	0	0.0008336	0.000739172	Tigar
Q8K274	0	0.00160009	0.000268629	0.00108854	0.000643486	Fn3krp
P62715	0	0.000800044	0.00107451	0.000362845	0	Ppp2cb
H7BWZ3	0	0	0	0	0.000584815	Arpc3
A2A7S7	0.00018774	0	0.00103022	0.000397586	0.00088137	Yars
G3UZM8	0	0	0	0	0.000680949	Apoe
P28652	0	0	0.000153148	0.000620586	0	Camk2b
E9Q2C2	0	0	0	0	0.00155342	Arf4
P68033	0.00421295	0.00819674	0.00110088	0.00297399	0	Actc1
F6V9F1	0.000598223	0.000698343	0.00140689	0.00190033	0.00112337	Pcmt1
S4R2J8	0.00492491	0	0.000701955	0.000237039	0	Bin2
Q7TMM9	0	0	0.000186531	0	0	Tubb2a
Q9Z1G3	0	0.000323578	0.000434588	0	0.000780774	Atp6v1c1
A0A140LI60	0	9.92825e-05	0	0	0	Myh14
A0A140LHU1	0	0.000929374	0	0	0	Adsl
P42932	0	0	0.000151471	0.000204597	0.000362841	Cct8
Q9QUI0	0	0	0	0.00290464	0.000515122	Rhoa
Q9DC07	0	0.000457803	0	0.000415256	0.000736434	Nebl
A0A0R4J1N0	0	0.000208443	0.000139977	0.000378142	0	Dpysl4
P18608	0	0	0	0.00116791	0	Hmgn1
E9Q912	0.00209329	0.000407271	0.000683742	0.000369421	0.000982721	Rap1gds1
O88487	0	0.000201972	0	0	0	Dync1i2
O88485	0	0.000196826	0	0.000178534	0	Dync1i1
P24288	0	0	0	0.000871393	0.000772683	Bcat1
P27773	0.000419349	0.000979064	0.000164369	0.00111009	0	Pdia3
A2A813	0	0.00141265	0.00616618	0.00704749	0	Park7
Q9WU78	0	0	0.000955192	0	0.000228811	Pdcd6ip
D3YZY0	0.0071868	0.0139827	0	0	0	Actg2
A0A087WPT4	0.000566233	0	0	0.00299784	0.00053165	Idh1
P06837	0	0.00381166	0.001097	0.00345742	0.000437967	Gap43
P70122	0	0.000494427	0	0.000448477	0	Sbds
Q3UY21	0	0.000500432	0	0	0	Mog
A0A087WNP6	0	0.00210394	0.000706436	0.00190841	0.000846115	Cdv3
A0A0J9YU05	0	0	0	0.000673389	0.000895663	Wdr1
P59325	0	0	0	0	0.000231745	Eif5
Q6P8J7	0	0	0	0.000267588	0	Ckmt2
V9GXQ2	0.0101813	0	0	0	0	Gm17087
Q5XK38	0	0.00134355	0	0.00365606	0	Hmgn2
P97807	0	0	0	0.000221142	0.000392184	Fh
P50518	0.00093704	0.000546933	0.00146914	0.000992206	0.00087981	Atp6v1e1
P68037	0	0.000802641	0.000539001	0.00218414	0.0025823	Ube2l3
B0QZN5	0	0	0	0.00206354	0.00060993	Vamp2
Q9QYR6	0.00125873	0.0016475	0.00107645	0.00153477	0.00146836	Map1a
E9PUM3	0	0	0	0	0.000131855	Pygm
P62737	0.00421295	0.00819674	0.00110088	0.00297399	0	Acta2
E0CXZ8	0.00331929	0	0	0	0	Dnm3
E0CXZ9	0	0.000323578	0	0	0	Kcnab2
Q9D898	0	0.000807887	0.000542524	0	0	Arpc5l
F8WGG5	0	0	0.000838447	0	0	Pitpna
Q3URD3	0	0	0	0.000132685	0	Slmap
A0A140LHW9	0	0	0	0.00314353	0	Rab30
E9PUM4	0	4.86258e-05	0	8.82134e-05	0.000156442	Tln2
Q62393	0	0.000551816	0	0.000500532	0	Tpd52
D3Z7R1	0.00079019	0	0	0	0	NoName
E9Q0A7	0	0.000297132	0	0	0	Oxr1
F7A8H6	0	0	0	0.000886318	0.000392959	NoName
P17742	0.0264714	0.0180888	0.0571933	0.0218769	0.0260671	Ppia
Q9JJK2	0	0.000274682	0	0	0.00110465	Lancl2
P58252	0.000493639	0.000288128	0.000483719	0	0.000115872	Eef2
D3Z3J6	0	0.000673606	0	0.000305502	0	Paip1
P18826	0	0	0	0	8.01117e-05	Phka1
Q8BT23	0	0	0	0.00115587	0	Hnrnpk
A0A0R4J1P2	0	0.00130571	0	0	0	Tpm3
F8WIK0	0	0.00240013	0.000537257	0.00181423	0	Ciapin1
H3BJ43	0	0	0	0.00145609	0	Hnrnpk
P48455	0	0	0	0	0.000193798	Ppp3cc
Q3UKW2	0.00322494	0.00125489	0.0185395	0.00569133	0.0040373	Calm1
P62983	0.0156113	0.00554646	0.0101097	0.00718713	0	Rps27a
P62984	0.0190263	0.00675974	0.0123212	0.00875931	0	Uba52
P62743	0	0.00087047	0	0	0	Ap2s1
Q8K003	0	0	0	0	0.00310683	Tma7
Q61316	0.000377713	0.000293952	0.000493497	0.000799899	0.000945718	Hspa4
P12658	0	0	0.00127213	0.000429576	0.00114274	Calb1
Q80VB6	0	0	0	0.000617737	0	Dclk1
A0A1D5RMC1	0	0.0006089	0	0.000552311	0	Dync1li2
Q61792	0.00201303	0.000469988	0.0025249	0.000426309	0.000378017	Lasp1
Q61553	0	0	0	0	0.00020166	Fscn1
A0A0R4J0I1	0	0	0	0.000268228	0.00071353	Serpina3k
Q8CBC8	0	0	0	0.000742511	0.000658401	Bcat1
P47753	0	0.000864383	0	0	0.000695235	Capza1
Q9CQD1	0	0	0	0	0.000462412	Rab5a
F7CJN9	0	0	0.00200015	0	0	Trf
Q9CYT6	0	0	0	0	0.000208863	Cap2
P46664	0	0	0	0	0.000436046	Adss
P56480	0.000800646	0.000467322	0	0.000635837	0.000375874	Atp5f1b
P47757	0	0	0.0038956	0	0	Capzb
Q9CQD4	0.000532088	0	0	0.000563413	0	Chmp1b2
D3YXG6	0	0	0	0	0.000350065	Arpc2
Q9JKC6	0.00781705	0.0107845	0.00222836	0.00827726	0.00934134	Cend1
Q5SX22	0.010768	0.0036663	0.0066827	0.00475081	0	Ubb
Q9R0Y5	0	0.0012743	0	0.000577934	0	Ak1
Q91YI0	0	0	0	0	0.000214264	Asl
A0A0N4SVV8	0.00274315	0	0	0	0	Ldhb
P46660	0	0.00222048	0.000331362	0.00134275	0.0019844	Ina
A0A0N4SW76	0	0	0	0	0.00318139	Hspa4l
A2AGN7	0	0.000309017	0	0	0	Psmc3
Q91WE4	0	0	0	0.00155721	0	NoName
Q7TNC9	0	0.000300016	0	0	0.000241307	Inpp5a
D3YXH0	0	0.00165915	0	0.00112872	0.00433705	Igsf5
Q8CBB6	0	0	0	0	0.00222579	Hist1h2bq
E9QLK9	0	0.00109751	0.000368507	0.00111995	0	Snap91
Q80ZJ2	0	0.000447851	0.00240598	0.000406229	0.000720424	Impa1
A2BFF9	0	0.000193741	0	0	0	Dync1i2
Q3TZL0	0	0.000180185	0	0	0	Gm14226
Q9WV55	0.00255146	0.000992825	0	0.00135083	0.00199636	Vapa
Q9CZ44	0	0	0.000224341	0	0.000806097	Nsfl1c
Q6R0H7	0	0.000109097	0	0	0	Gnas
Reverse_tr|A2ALV1|A2ALV1_MOUSE	0	0	0	0	0.000546256	NoName
Q78PY7	0	0.000135832	0	0.000123208	0	Snd1
Q9CX00	0	0	0	0	0.000274637	Ist1
Q9DCD0	0	0.000511829	0.000687422	0.000464262	0.000823342	Pgd
E9Q9F5	0	0	0	0.000513131	0	43350
A2BFF8	0	0.000202302	0	0	0	Dync1i2
A2BFF5	0	0.000194045	0	0	0	Dync1i2
F6VTH5	0	0	0	0	0.000423058	Lztfl1
E9QLL2	0.00134964	0	0	0	0	Dnm3
P21107	0	0.00130112	0	0	0	Tpm3
Q3UPV6	0	0.000350161	0	0	0	Kcnab2
E9Q0U7	0	0	0	0.000274466	0	Hsph1
A0A0R4J0K2	0	0.000184396	0	0	4.94374e-05	Ckap5
Q9QXL2	6.33286e-05	0.000147855	0.000645383	6.7057e-05	0.000297304	Kif21a
E9QNP0	0.0104973	0.00372951	0.00679792	0.00483273	0.00857057	Kxd1
A0A0G2JGL0	0	0	0.000560853	0	0.000671747	Ube2d3
Q8R2U6	0	0.000690541	0	0.000626364	0.00111082	Nudt4
Q9DCC5	0	0.000675447	0	0	0	Cbx3
Q3UHD9	0	0.000208443	0	0	0	Agap2
Q61548	0.00434824	0.00109751	0.000368507	0.00111995	0.00132411	Snap91
Q9CZ30	0	0.000936415	0	0.00141565	0.000753171	Ola1
Q8BRB6	0	0	0	0.000344982	0	Tbc1d24
P68254	0.00561841	0.0307756	0.00237161	0.00594918	0.00649264	Ywhaq
P14824	0.00125867	0	0	0	0.00147724	Anxa6
E9PVC7	0	0	0	0	0.00022044	Cdk14
P11798	0	0	0.000173653	0.000703677	0	Camk2a
Q20BD0	0	0	0	0.000337708	0	Hnrnpab
Q05816	0	0	0.00491889	0.000830513	0.000736434	Fabp5
E0CYH7	0	0	0	9.91328e-05	0	Filip1l
F8WI65	0	0	0	0	0.000195706	Ahcyl2
H3BJQ7	0	0	0.0019485	0	0	Prdx5
P20029	0	0	0	0.000171174	0	Hspa5
Q8VEM8	0	0.00103871	0	0	0.000278483	Slc25a3
D3Z7F0	0.00267388	0	0	0	0	Ldhb
E9Q7C9	0	0.000882905	0	0.000400426	0	Klc1
Q99J08	0	0.00092015	0	0.000278212	0.000246696	Sec14l2
D3YZN8	0	0.000452772	0	0	0	Unc45a
P60521	0.00452502	0.00105647	0.00212836	0.000958284	0.00254919	Gabarapl2
Q8R0P4	0	0	0	0	0.000814906	Aamdc
P60766	0.0022175	0.000647156	0	0.00117402	0.000520516	Cdc42
D3Z0Y2	0	0	0.000415031	0.00112119	0.00149128	Prdx6
Q61598	0.00856602	0.00138884	0.00167878	0.00352735	0.00156389	Gdi2
Q62446	0	0.00275908	0	0.000500532	0.0013315	Fkbp3
B7ZNL3	0	0.00130571	0	0	0	Tpm1
Reverse_tr|D6RFB4|D6RFB4_MOUSE	0	0	0	0.000252521	0	NoName
P19096	0.000169146	0.000148091	0	0.000268656	0.000158816	Fasn
A2A6H1	0.00945406	0	0.011858	0.00200213	0.00177533	Lasp1
A2A6H0	0.00284638	0.000664552	0.00357016	0.000602792	0.000534508	Lasp1
A0A0N4SVS1	0	0.00108427	0	0.000983502	0	Dync1i1
Q924B0	0	0.000446234	0.00239729	0.000404763	0.000717824	Impa1
Q62442	0	0	0	0.00285049	0.00084253	Vamp1
Reverse_tr|A2ALV3|A2ALV3_MOUSE	0	0	0	0	0.00023067	NoName
P14873	0.00292216	0.00280924	0.00202126	0.00218414	0.00205777	Map1b
Q3TMU8	0	0.000216096	0.000145116	0.000392025	0	Dpysl4
P46467	0	0	0	0	0.000223916	Vps4b
Q8BGT8	0	0.000329618	0.00022135	0	0.000530232	Phyhipl
D3Z0Z5	0	0	0	0	0.000920542	Diras1
D6RIN1	0	0.000197771	0	0	0	Unc45a
P46460	0.00725828	0.0013291	0.00278919	0.00316466	0.00120264	Nsf
Q8BH40	0	0	0	0	0.000761828	Stx7
A0A0N4SW34	0	0.00142077	0	0	0	Atp6v1e1
P47791	0	0	0.000332025	0.000224238	0	Gsr
D6RIN4	0	0.0023322	0.0689108	0.0338473	0.0112549	Dynll2
A0A0G2JEG8	0.00337606	0.000895701	0.000481196	0.000162492	0.00057634	Amph
P35564	0.000179163	0.00146404	0.00014045	0.00113827	0.00134577	Canx
V9GWV1	0	0.000307479	0	0.000278904	0.00024731	Arfgap1
Q3V038	0	0.000564414	0	0	0.000453966	Ttc9
F7CPX0	0	0.000429937	0	0.00019499	0.000518706	Sgip1
Q8BXU5	0.00259311	0.00403614	0	0.000915259	0.00040579	Sh3gl2
Q8BVQ5	0	0.000320225	0	0.000871393	0.000772683	Ppme1
E9Q197	0	0.00088607	0	0.000401861	0.00106902	Glod4
B1AX58	0	0.000193438	0.0002598	0.000526381	0.000777923	Pls3
P49722	0	0	0.003902	0	0.000424866	Psma2
D6REF3	0	0	0.00319255	0	0	Ywhae
A0A0J9YTY0	0	0	0	0.00026381	0	43354
A2AMW0	0	0.000475411	0.00415031	0.000862456	0.00152952	Capzb
P00493	0.00242857	0.000567003	0.00266534	0.00257154	0.000912097	Hprt1
Q61335	0.000864371	0.00100903	0	0.000457629	0	Bcap31
Q62426	0.00108046	0.0151355	0	0	0.00202895	Cstb
Q9CWS0	0	0.000867416	0.00087375	0.000786802	0.000348837	Ddah1
E9Q9J0	0.0253684	0.00901299	0.0164283	0.0116791	0	Uba52
Q68FD5	0.00107466	7.37951e-05	0.000594671	0.000133874	0.000296772	Cltc
G3X9L6	0	0.00154508	0	0.000700745	0	NoName
Q7TNF4	0	0.000813202	0	0.000368813	0	Klc1
Q62420	0.00180487	0.00280924	0	0.000637041	0.000282439	Sh3gl2
Q5SWR0	0	0	0.00377301	0.00509633	0.00225951	Ap2b1
Q8VD04	0	0	0	0	0.000123348	Gripap1
G3UZV6	0	0	0	0	0.00104376	Map2
P11590	0	0	0	0	0.000558531	Mup4
Q3TEG0	0	0.000279022	0	0.000506182	0	A830010M20Rik
P68433	0	0	0	0.000824406	0.000731019	Hist1h3a
Q3UHJ0	0	0	0	0.000116913	0.000103669	Aak1
D3Z3A0	0	0.00253552	0.000851346	0.00057497	0	Ppp1r2
Q66JS6	0	0.000469988	0	0	0.000756035	Eif3j2
F8WI35	0	0	0	0.000830513	0.000736434	H3f3a
M0QWC2	0	0	0	0	0.00497093	Map1lc3b
B0V2H4	0	0	0	0.00241117	0.00320705	Atp6v1g2
D3Z7I9	0	0.00134355	0	0	0	Osbpl1a
P60710	0.00423542	0.00824045	0.00110675	0.00298985	0.0103395	Actb
Q9CX34	0	0.000735754	0	0.000667376	0	Sugt1
P45591	0	0	0	0.00337709	0	Cfl2
Q8C1B7	0	0	0	0.000260137	0	43354
B2KF55	0.00336144	0	0	0	0	Ube2v2
Q3UHH4	0	0	0.000327226	0	0.000261284	Trim2
A2A6G9	0.00410409	0.000958192	0.00514767	0.000869141	0.000770687	Lasp1
Q149F3	0	0.00019558	0	0	0	Gspt2
F8WHQ1	0	0.000500432	0	0.000453924	0	Tpd52
Q3ULQ2	0	0	0	0	0.000625274	Pin1rt1
Q9QZM0	0	0	0	0	0.000467485	Ubqln2
Q8CHP8	0.00362847	0.0011552	0	0.000698562	0.00154858	Pgp
A2A6G6	0.00594862	0.00138884	0.00746123	0.00125977	0.00111706	Lasp1
A2A6G5	0.00767286	0	0	0.00162492	0.00144085	Lasp1
P80318	0	0.000226801	0	0.000205723	0	Cct3
Q9D0A3	0	0	0.000367284	0	0	Arpin
Q80ZL4	0	0	0	0	0.000851551	Map2
A2A6G8	0.00514007	0.00120007	0.00644709	0.00108854	0.000965229	Lasp1
Q8BGQ7	0.00109386	0.000638465	0.0012005	0.00115826	0.00164328	Aars
A2A6G7	0.00534775	0.00124855	0.00670757	0.00113252	0.00100423	Lasp1
P80316	0	0	0	0.000207244	0	Cct5
P10639	0.00705903	0.00706324	0.00632428	0.00427121	0.00378737	Txn
E9QLA8	0	9.97633e-05	0	0.000180983	0	A830010M20Rik
Q60864	0.000975004	0.000910547	0.00183439	0.00289074	0.00402801	Stip1
F6QKK2	0	0	0	0	0.00120507	Arl8a
Q8BVE3	0	0	0	0.000232131	0	Atp6v1h
D3Z4U3	0	0	0	0.000714135	0	Ube2k
F6Y9P3	0	0	0	0	0.00074193	Grk2
P10637	0.0186347	0.00438441	0.0040767	0.00504766	0.00637472	Mapt
E0CYM1	0	0	0	0.000125553	0	Filip1l
P10630	0	0	0	0.000275477	0	Eif4a2
D3YUY7	0	0	0	0	0.000133627	Trim3
Q9R0P5	0.00128346	0.00149826	0.0135828	0.00475657	0.00542283	Dstn
Q8VCE0	0	0	0.000315313	0	9.44146e-05	Atp1a3
Q3TQP6	0	0.000223925	0	0.000406229	0	Me1
Q6PER3	0.000753633	0.000439882	0.00295396	0.000399001	0.00106141	Mapre3
Q9R0P9	0.0156692	0.0271602	0.00409448	0.0241333	0.0187246	Uchl1
D3Z0M6	0	0.000191638	0	0.000173828	0	Dync1i1
Q8CAY6	0	0	0.000418167	0	0	Acat2
P47915	0	0	0	0.000700745	0	Rpl29
Q6P8X1	0	0	0	0	0.000244873	Snx6
G3UZX6	0	0	0	0.00238552	0.00423058	Sumo3
Q9EPU0	0	0.00010997	0	0	0	Upf1
P63168	0	0	0	0.00251953	0.00335119	Dynll1
F6ZL13	0	0	0	0	0.000430383	Sh3gl2
Q8VCD6	0	0.000486641	0	0.000882829	0.000782823	Reep2
Q8VEH3	0	0	0	0	0.00106902	Arl8a
A0A0N4SWA3	0	0.0015847	0	0	0	Atp6v1e1
A0A0G2JER6	0	0.000555536	0	0	0	Agap3
O54962	0	0	0	0.00125977	0.00223413	Banf1
P09411	0.00710982	0.00533554	0.0145311	0.0129058	0.0128743	Pgk1
F6VW30	0.00454294	0.0248845	0.00191764	0.0048104	0.00524983	Ywhaq
Q923T9	0	0	0.000156912	0.000635837	0	Camk2g
Q9JJZ2	0	0.000275293	0	0	0	Tuba8
F8VPN3	0.0295327	0	0	0	0	Gm5160
Q60631	0	0.000569616	0	0.000516678	0	Grb2
F6UV57	0	0	0	0.000258936	0	Slmap
D3YUZ8	0.000280491	0	0.0020889	0.000742511	0.000921762	Dlg2
Q9ES97	0	0	0	0.000116306	0.000206263	Rtn3
Q03265	0.000382949	0.000447041	0	0.00141923	0.000898902	Atp5f1a
Q9WUK2	0	0.000498414	0	0.000904187	0.000400881	Eif4h
Reverse_sp|Q62420|SH3G2_MOUSE	0	0	0	0	0.000282439	NoName
Q99P72	0.00191359	0.00117012	0.000142868	0.000868393	0.000513349	Rtn4
P54227	0.0255831	0.0157619	0.00612798	0.0067723	0.0106758	Stmn1
Q60870	0	0	0	0	0.000537398	Reep5
P39053	0.00122129	0.00114055	0.000765917	0.000775912	0.000573348	Dnm1
P06151	0.00574078	0.00595695	0.0117509	0.00168854	0.00239563	Ldha
P05063	0.00612561	0.00612926	0.00868936	0.00895718	0.00712089	Aldoc
P05064	0.011054	0.0108665	0.0303292	0.0378864	0.0412423	Aldoa
Q9JHU4	0	7.98493e-05	0	9.65712e-05	0.000171264	Dync1h1
E9Q4T8	0	0.000176078	0	0	0	Cul3
A0A0G2JF40	0	0	0.00286228	0	0.00342823	Ube2d3
Q923S9	0	0	0	0.00165693	0	Rab30
F6RLL5	0	0.00128757	0	0.00116791	0	Kif2a
F8VQ28	0.000179163	0	0	0	0	Pxn
Q9QXC6	0	0	0.00231645	0.00104297	0.000462412	Cryba1
P10854	0.00336144	0	0.00131756	0.0115679	0.00236711	Hist1h2bm
D3YZD8	0	0	0	0	0.00066279	Aamdc
E9PZB2	0	0	0	0.00140149	0	Rab11a
P10853	0.00336144	0	0.00131756	0.0115679	0.00236711	Hist1h2bf
P32883	0.00168072	0.000654004	0.00175675	0.000593223	0.000526024	Kras
Q8K2B3	0	0	0	0.000168854	0	Sdha
P23927	0	0	0	0.000640681	0.000568106	Cryab
Reverse_sp|Q8BXX2|ZBT49_MOUSE	0	0	0	0.000148306	0	NoName
G3UY72	0	0.000770135	0	0	0	Aldh7a1
G5E902	0	0.00103581	0	0	0.000277706	Slc25a3
Q91VZ6	0	0.000280924	0	0	0	Smap1
E9Q2Q7	0	0.000722847	0	0	0	Trf
Q8R527	0	0	0	0	0.000484969	Rhoq
A0A0A6YXF6	0	0	0	0.00339755	0.000602537	Rhoa
E9QB01	0	0	0.000684386	0.000528241	0	Ncam1
Q921M7	0	0	0	0	0.000306847	Fam49b
A0A0J9YTZ8	0.00099892	0	0	0	0	Pxn
Q3UNH4	0	0.000397876	0	0	0	Gprin1
Q9WUM4	0.00268065	0.00234696	0.00157607	0.000946154	0.00209744	Coro1c
Q8BGD9	0	0.000404605	0.000271706	0.00128451	0.000976287	Eif4b
P68404	0	0.000552638	0.000247411	0.000167093	0.000148165	Prkcb
Q8VIM9	0	0.000212018	0.000142378	0	0	Irgq
Q9CQ92	0	0	0	0	0.00065407	Fis1
P08553	0	0.0023322	9.78847e-05	0.00185103	0.0021103	Nefm
P08551	0.00117001	0.00409746	0.000917196	0.00123889	0.00274637	Nefl
E9Q0N6	0.00756325	0	0	0.0016017	0.00142027	Lasp1
Q11011	0	0	0	0	0.000216127	Npepps
D3Z360	0	0.000792351	0	0	0	Dpysl4
Q63932	0	0	0.000827992	0.000279599	0.000247927	Map2k2
Q3TA40	0	0.000622704	0	0.000564832	0	6430548M08Rik
D3Z2U2	0	0	0	0.00145609	0	Tpd52
Q99L47	0	0.0023322	0.00425099	0.000302208	0.000803924	St13
D3Z125	0	0.000690541	0	0.000626364	0	Tpd52
P34884	0	0.00107484	0	0	0	Mif
Q99L45	0	0	0	0	0.000300358	Eif2s2
G5E8R0	0	0.00151355	0	0	0	Tpm1
Q99L43	0	0.000556787	0	0.000252521	0.00111958	Cds2
Q8CDC8	0	0	0	0.000803722	0.000712678	Fhl4
E9Q586	0	9.97633e-05	0	9.04917e-05	0.000160482	Dctn1
Q8VCH8	0	0	0	0.00022158	0	Ubxn4
O88935	0	0	0.000705435	0.000158809	0.000422459	Syn1
P23506	0.000466456	0.000544523	0.001097	0.00148175	0.000875935	Pcmt1
P52480	0.00578282	0.00419006	0.0293883	0.0147803	0.0117954	Pkm
E9Q589	0	0	0.000801439	0.000618589	0	Ncam1
B1ASE2	0	0.0017914	0	0.000812458	0	Atp5h
Q60676	0	0	0	0.000449376	0.000199236	Ppp5c
Q61768	0	0	0	0.000232854	0	Kif5b
D3Z134	0	0	0	0.000377506	0	Mgarp
D3Z375	0	0	0	0.00121869	0	Pea15a
A0A1D5RMH1	0	0	0	0.00350373	0	Rab4a
E9Q9A3	0	0.00118002	0.000396211	0.00120414	0	Snap91
A2AKJ2	0	0	0	0.000836711	0	Vim
P30275	0	0	0	0.000268228	0	Ckmt1
Q3U4W8	0	0.000148032	0	0	0	Usp5
A0A0G2JF08	0	0	0.0120493	0	0.00160353	Sec22b
Q9CWK8	0	0.000476327	0	0	0.000383116	Snx2
Q3TT92	0.000372836	0.00130571	0.000292275	0.00118436	0.0010502	Dpysl3
contaminant_GR78_PIG	0	0	0	0.000560596	0	NoName
P47708	0	0.000181508	0	0	0	Rph3a
F2Z459	0	0	0.000669405	0	0	Acat3
P01942	0	0.00087047	0.0023382	0.00157914	0.00210039	Hba
A0A0G2JGS4	0	0	0.000155734	0.000631065	0.000559579	Camk2d
F2Z456	0	0	0	0.000716417	0	Cyb5r3
E9QQ05	0	0.00113923	0.000382517	0.00116253	0	Snap91
Q80SW1	0	0	0	0	0.000187582	Ahcyl1
Q8BXK8	0	0.000288464	0	0	0	Agap1
P28184	0	0	0	0.00164881	0	Mt3
P11983	0	0	0	0.000403307	0.00017881	Tcp1
Q99KQ4	0	0	0.000169055	0	0	Nampt
H3BLG3	0	0	0	0.0011402	0	Rab26
P84091	0.000243415	0.000284153	0	0.000515491	0.000457097	Ap2m1
Q8VEJ9	0	0	0	0	0.000227502	Vps4a
P84084	0	0	0	0	0.000552325	Arf5
G3X9T4	0	0	0	0.000407706	0	Mgarp
F8WHZ9	0	0.000186717	0	0.000169364	0.000300358	Add1
Q4KMM3	0	0.000285466	0	0	0	Oxr1
P84086	0	0	0	0.00167342	0.00074193	Cplx2
G3UVV4	0.000346408	0.000404384	0	0.000244535	0.000325252	Hk1
Q99KP6	0	0	0	0.000222459	0	Prpf19
Q6ZWY9	0.00336144	0	0.00131756	0.0115679	0.00236711	Hist1h2bc
A0A0J9YUA7	0	0	0.00253454	0	0.00075892	Ap2a2
F7BAE9	0	0	0.0017915	0	0	Trf
Q9JMA1	0	0.000250724	0	0.000682267	0.000604981	Usp14
P55772	0	0	0	0	0.000194938	Entpd1
P19246	0.00252571	0.00408242	0.00335071	0.00236582	0.00401323	Nefh
P35700	0	0	0.000834233	0.000563413	0.000499591	Prdx1
G3X9U9	0	0	0	0	0.000685645	Fis1
E9QAS7	0	0.000292907	0	0	0.000235589	Inpp5a
Q3U367	0	0	0	0.000432893	0.000191928	Aldh9a1
G5E8R3	8.98858e-05	0.000104929	0.000211391	0.00038071	8.43961e-05	Pcx
Q9Z1Z2	0	0	0	0.000320341	0.000284053	Strap
P84075	0.00658355	0.00448315	0.00172034	0.00232371	0.00257561	Hpca
G5E8R1	0	0.00149524	0	0	0	Tpm1
E9Q133	0	0.0002438	0	0.000221142	0	Cct3
Q8VCE2	0	0.000332276	0	0	0	Gpn1
P84078	0	0	0	0	0.000549274	Arf1
A0A0G2JGQ6	0	0	0	0.000303435	0.000269062	Dclk1
A0A0G2JGQ0	0	0	0	0.000818389	0	Anxa5
