# Supplementary material for: Quantitative transportomics identifies Kif5a as a major regulator of neurodegeneration
Source: eLife. 2022 Mar 8;11:e68148. doi: 10.7554/eLife.68148 (PMC8947766; doi:10.7554/eLife.68148)
Supplement: Figure 5—source data 1. [file elife-68148-fig5-data1.xlsx]

## Sheet: Figure 5a- source data
Legend: Protein-by-protein comparison of fold change in ONC compared to Kif5a knockout from Figure 5a.
Gene	Log2FC Crush/Control	Log2FC Kif5a KO/Control
Aars	-0.508176	0.656339
Uchl1	-1.47872	-0.748809
Gdi1	-0.943839	-1.31045
Acly	-0.67482	0.803369
Acot7	0.520285	-0.583332
Acot7	0.520285	-0.583332
Acta1	0.274687	-1.69941
Acta2	0.274687	-1.69941
Actb	0.274686	-0.863781
Actc1	0.274687	-1.69941
Actg1	0.274686	-0.863781
Actg2	0.274686	-1.69941
Adh5	-0.632055	2.47392
Akr1a1	-0.121564	0.250001
Vapb	-0.87851	-0.300667
Alb	0.440592	-0.0250553
Aldoa	-0.483496	1.72328
Aldoa	-0.483496	1.71935
Aldoc	-0.0302675	0.422834
Amph	1.5439	-2.28884
Amph	1.5439	-2.28884
Anxa2	-0.253163	0.163439
Anxa6	0.531247	0.274435
Arhgdia	-1.11555	0.546799
Atp5f1a	0.136158	1.44882
Ddah1	-0.869162	-0.481466
Atp6v1b2	0.688476	-0.898068
Atp6v1c1	0.122387	0.848163
Atp6v1e1	0.520829	0.60184
Basp1	-1.07952	0.0547806
Ddah1	-0.869162	-0.481466
Wdr1	-0.81321	-0.148133
Nsf	-0.804888	-0.499007
Eef1a2	-0.764545	-0.232898
Calb2	0.962521	-0.415998
Cand1	-0.566824	0.708157
Canx	2.01774	0.226483
Capzb	0.686848	1.89036
Cend1	0.468415	-0.722501
Cfl1	-0.108686	1.32804
Cfl1	-0.108686	1.32804
Acly	-0.67482	-0.221678
Clic1	-0.110491	1.38019
Cltc	0.621621	0.0270716
Cltc	0.621621	0.0270717
Acly	-0.67482	-0.221678
Cycs	-0.667544	-0.974304
Sncb	-0.640144	-1.14727
Dlg2	-0.41556	2.00587
Dlg2	-0.41556	2.00587
Pygb	-0.612409	-0.81241
Mdh1	-0.610662	-0.908296
Dnm1	-0.602026	-0.756828
Dpysl2	0.0486627	-0.364823
Dpysl3	0.135817	0.0326666
Dpysl3	0.135817	0.0326666
Dpysl3	0.135817	0.0326666
Dnm1	-0.602026	-0.756828
Dstn	-0.674646	2.3459
Dync1h1	0.518353	0.68759
Dynll2	0.248483	3.67168
Dynll2	0.248483	3.67168
Dnm1	-0.602026	-0.756828
Eif5a	0.555504	1.06503
Eif5a	0.555504	1.06503
Eno1	0.631336	0.680151
Eno2	0.119797	1.54236
Eno2	0.119797	1.56534
Fasn	0.125248	0.384179
Fasn	0.125248	0.384179
Fkbp4	0.0556458	0.615063
G6pdx	0.055133	0.546513
Nefh	-0.55172	-0.019201
Gapdh	0.658839	-0.750486
Gapdh	0.658839	-0.750485
Gars	-0.391572	2.01582
Map1b	-0.492924	-0.457477
Hk1	-0.44889	-0.408302
Gnao1	1.12901	-0.400876
Got1	0.512768	2.83401
Got2	-0.651639	1.26162
Gpi	-0.189195	0.0840126
Hint1	0.358533	1.65688
Hint1	0.358533	1.76851
Hk1	-0.44889	-0.408302
Atp5f1b	-0.42115	-0.32334
Hpca	0.271073	-1.32034
Hpca	0.271073	-1.32034
Ckb	-0.415443	-0.541543
Hspa4	-0.618516	1.11166
Hspa4	-0.618516	1.11166
Hspa8	-0.423017	0.585949
Hspa8	-0.423017	1.11788
Idh1	0.662628	1.15677
Idh1	0.662628	1.15677
Idh1	0.662628	0.611655
Impa1	-0.341315	0.990213
Impa1	-0.341315	0.990213
Impa1	-0.341315	0.990213
Impa1	-0.341315	0.990213
Impa1	-0.341315	1.14241
Ina	2.47596	-1.21075
Tppp3	-0.360648	-0.260497
Lasp1	-0.284638	-1.4418
Lasp1	-0.284638	-0.392458
Lasp1	-0.284638	-0.392458
Lasp1	-0.284638	-0.392458
Lasp1	-0.284638	-2.32612
Lasp1	-0.284638	-0.392458
Lasp1	-0.284638	-0.392458
Lasp1	-0.284638	-0.392458
Lasp1	-0.284638	-2.32612
Snca	-0.247943	-1.17899
Ldha	-0.208326	-0.690951
Ldha	-0.208326	-0.690951
Ldhb	-0.00200499	0.351236
Map1a	0.288442	-0.0999494
Map1a	0.288442	-0.0999493
Ldha	-0.208326	-0.690951
Map4	0.412269	0.39689
Map6	-0.349984	1.1594
Map6	-0.349984	1.14988
Mapre3	0.15357	0.914995
Mapre3	0.15357	0.904136
Ldha	-0.208326	-0.690951
Pitpna	-0.185053	-1.06643
Pitpna	-0.185053	-1.06643
Pitpna	-0.185053	-1.06643
Mdh2	0.0761501	0.664184
Nceh1	0.165063	-0.444318
Necap1	-0.138473	0.142405
Sh3gl2	-0.17154	-2.4083
Nefl	2.45652	-0.583332
Nefm	0.852314	-1.68403
Nefm	0.852314	-1.68403
Sh3gl2	-0.17154	-2.4083
Sh3gl2	-0.17154	-2.4083
Pacsin1	0.635677	0.903145
Pak3	-0.700264	0.323547
Pak3	-0.700264	0.323547
Park7	-0.681279	2.22234
Park7	-0.681279	1.57182
Pcmt1	0.997295	1.15848
Pcmt1	0.997295	1.15848
Pcmt1	0.997295	1.15848
Pcmt1	0.997295	1.15848
Pcmt1	0.997295	1.15848
Pcp4	1.34915	0.415254
Pdap1	0.543946	0.128559
Pdxk	-0.341273	0.0303069
Pebp1	0.428464	-3.40375
Pebp1	0.428464	-3.40375
Pfkl	0.134928	-0.227447
Pfkm	1.51947	-0.227447
Pfkp	0.048491	-1.05192
Pfkp	0.048491	-1.05192
Pfn2	0.0678644	-2.59432
Pfn2	0.0678644	-2.59432
Pgam1	-0.0057474	1.76065
Pgd	0.264067	0.323547
Pgk1	0.16213	1.12309
Pgm1	-0.561159	0.990213
Pgrmc1	0.349522	-0.245969
Cadps	-0.171257	-0.94174
Cadps	-0.171257	-0.94174
Skp1	-0.169848	-1.81198
Pkm	-0.404472	1.80827
Pls3	-0.258948	1.29251
Pls3	-0.258948	1.29251
Pls3	-0.258948	1.29251
Ppia	0.787677	0.546064
Ppid	0.0493997	0.264134
Gabarapl2	-0.150676	-0.335816
Rps27a	0.751046	-0.126499
Dpysl5	-0.146911	-2.91263
Rufy3	1.02316	0.990213
Rufy3	1.02316	0.642405
Sars	0.120587	-0.328987
Sars	0.120587	-0.328988
Vsnl1	-0.146325	-0.51321
Mapt	-0.143192	-0.812235
Mapt	-0.143192	-0.823419
Mapt	-0.143192	-0.831025
Slc25a4	-0.34177	0.0141614
Snap91	0.539392	-0.772633
Snap91	0.539392	-0.772633
Snap91	0.539392	-1.41792
Snap91	0.539392	-0.772633
Akr1a1	-0.121564	-0.0833323
Cacybp	-0.0703428	-1.0291
Sncg	-0.156119	0.302986
Sptan1	1.01128	-1.15411
Sptan1	1.01128	-1.15411
Sptan1	1.01128	-1.15411
Sptan1	1.01128	-1.15411
Sptan1	1.01128	-1.15411
St13	0.324478	-1.20618
St13	0.324478	-1.20618
Stip1	-0.29928	1.55813
Stmn1	0.0230574	-1.3973
Stxbp1	0.468262	-0.226536
Tagln3	0.658477	-1.21014
Taldo1	-0.39198	0.575176
Taldo1	-0.39198	0.575176
Tf	-0.35012	2.34915
Tkt	0.584662	0.500639
Tpi1	-0.815134	3.29579
Tpm3	1.4558	0.879371
Tpm3	1.4558	0.879371
Cacybp	-0.0703428	-0.36984
Tuba1a	-1.50573	2.73315
Tuba1b	-1.50573	2.73315
Tuba3a	-1.50523	2.73315
Hsp90aa1	-0.0589654	-0.39593
Uba52	0.751046	-0.126499
Uba52	0.751046	-0.126499
Ubb	0.827079	-0.1572
Ubb	0.827079	-0.576761
Ubc	0.707759	-0.186646
Ubc	0.707759	-0.21676
Ube2n	0.118191	1.05416
Pabpc1	-0.0588648	-0.676454
Ywhaz	-0.0397855	-1.45401
Vcp	-0.199223	0.272553
Rtn4	-0.0388888	-1.90574
Wars	-1.76647	0.667281
Gdi2	-0.00814009	-0.715875
Yars	-0.150708	1.92323
Yars	-0.150708	1.92323
Ywhab	0.503985	-2.03269
Ywhae	0.432634	-1.4477
Ywhah	0.332471	-1.08888
Ywhaq	0.169519	-1.54448
Ywhaq	0.169519	-1.54448
Ywhaq	0.169519	-1.54448
Txn	-0.00797913	-0.594319
