# Supplementary material for: Quantitative transportomics identifies Kif5a as a major regulator of neurodegeneration
Source: eLife. 2022 Mar 8;11:e68148. doi: 10.7554/eLife.68148 (PMC8947766; doi:10.7554/eLife.68148)
Supplement: Figure 5—source data 2. [file elife-68148-fig5-data2.xlsx]

## Sheet: Fig5b- source data
Legend: Cellular component Gene Ontology using the PANTHER platform from Figure 5b.
Analysis Type:	PANTHER Overrepresentation Test (Released 20190429)
Annotation Version and Release Date:	GO Ontology database Released 2019-02-02
Analyzed List:	Decrease ONC and Kif5a KO (Mus musculus)
Reference List:	Mus musculus (all genes in database)
Test Type:	FISHER
Correction:	FDR
*Bolded term is representative from ontology hierarchy
GO cellular component complete	Mus musculus - REFLIST (22296)	ONC+KO (39)	ONC+KO (expected)	ONC+KO (over/under)	ONC+KO (fold Enrichment)	ONC+KO (raw P-value)	ONC+KO (FDR)
myelin sheath (GO:0043209)	214	15	0.37	+	40.07	1.85e-20	3.72e-17
cytoplasmic part (GO:0044444)	8368	37	14.64	+	2.53	5.61e-14	5.64e-11
somatodendritic compartment (GO:0036477)	1013	17	1.77	+	9.59	3.31e-13	2.22e-10
neuron part (GO:0097458)	1920	21	3.36	+	6.25	6.35e-13	2.55e-10
cytoplasm (GO:0005737)	10833	39	18.95	+	2.06	6.17e-13	3.1e-10
cell body (GO:0044297)	793	15	1.39	+	10.81	2.34e-12	7.85e-10
neuronal cell body (GO:0043025)	706	14	1.23	+	11.34	8.26e-12	2.37e-09
neuron projection (GO:0043005)	1483	18	2.59	+	6.94	1.13e-11	2.85e-09
cell projection (GO:0042995)	2405	21	4.21	+	4.99	4.66e-11	1.04e-08
cytosol (GO:0005829)	3453	24	6.04	+	3.97	8.68e-11	1.75e-08
plasma membrane bounded cell projection (GO:0120025)	2215	20	3.87	+	5.16	9.84e-11	1.8e-08
synapse (GO:0045202)	1379	16	2.41	+	6.63	4.72e-10	7.9e-08
axon (GO:0030424)	694	12	1.21	+	9.89	1.62e-09	2.51e-07
plasma membrane bounded cell projection part (GO:0120038)	1520	16	2.66	+	6.02	1.92e-09	2.57e-07
cell projection part (GO:0044463)	1520	16	2.66	+	6.02	1.92e-09	2.76e-07
intracellular part (GO:0044424)	13552	39	23.71	+	1.65	4.5e-09	5.33e-07
intracellular (GO:0005622)	13552	39	23.71	+	1.65	4.5e-09	5.66e-07
dendritic tree (GO:0097447)	694	11	1.21	+	9.06	2.15e-08	2.27e-06
dendrite (GO:0030425)	691	11	1.21	+	9.1	2.06e-08	2.3e-06
neuron to neuron synapse (GO:0098984)	412	8	0.72	+	11.1	5.4e-07	5.43e-05
growth cone (GO:0030426)	197	6	0.34	+	17.41	1.33e-06	0.000127
site of polarized growth (GO:0030427)	200	6	0.35	+	17.15	1.45e-06	0.000132
synapse part (GO:0044456)	1073	11	1.88	+	5.86	1.6e-06	0.00014
cell (GO:0005623)	15984	39	27.96	+	1.39	3.04e-06	0.000244
cell part (GO:0044464)	15982	39	27.96	+	1.4	3.03e-06	0.000254
postsynaptic density (GO:0014069)	385	7	0.67	+	10.39	4.61e-06	0.000356
asymmetric synapse (GO:0032279)	388	7	0.68	+	10.31	4.84e-06	0.000361
mitochondrion (GO:0005739)	1778	13	3.11	+	4.18	6.06e-06	0.000435
postsynaptic specialization (GO:0099572)	424	7	0.74	+	9.44	8.56e-06	0.000594
inclusion body (GO:0016234)	76	4	0.13	+	30.09	1.14e-05	0.00074
axon part (GO:0033267)	442	7	0.77	+	9.05	1.12e-05	0.000749
intracellular organelle (GO:0043229)	11831	34	20.69	+	1.64	1.35e-05	0.000846
organelle (GO:0043226)	12127	34	21.21	+	1.6	1.71e-05	0.00104
distal axon (GO:0150034)	363	6	0.63	+	9.45	4.02e-05	0.00238
neurofibrillary tangle (GO:0097418)	4	2	0.01	+	> 100	4.44e-05	0.00255
basal dendrite (GO:0097441)	8	2	0.01	+	> 100	0.000133	0.0074
postsynapse (GO:0098794)	720	7	1.26	+	5.56	0.000233	0.0127
photoreceptor ribbon synapse (GO:0098684)	12	2	0.02	+	95.28	0.000267	0.0138
dendritic growth cone (GO:0044294)	12	2	0.02	+	95.28	0.000267	0.0141
varicosity (GO:0043196)	16	2	0.03	+	71.46	0.000447	0.0225
main axon (GO:0044304)	84	3	0.15	+	20.42	0.000471	0.0231
organelle part (GO:0044422)	7586	24	13.27	+	1.81	0.000539	0.0258
membrane-bounded organelle (GO:0043227)	10877	30	19.03	+	1.58	0.000564	0.0258
organelle envelope lumen (GO:0031970)	89	3	0.16	+	19.27	0.000555	0.026
dendrite terminus (GO:0044292)	20	2	0.03	+	57.17	0.000671	0.03
supramolecular complex (GO:0099080)	877	7	1.53	+	4.56	0.000754	0.0316
supramolecular fiber (GO:0099512)	871	7	1.52	+	4.59	0.000725	0.0317
supramolecular polymer (GO:0099081)	876	7	1.53	+	4.57	0.000749	0.0321
ribbon synapse (GO:0097470)	23	2	0.04	+	49.71	0.000869	0.0349
perinuclear region of cytoplasm (GO:0048471)	644	6	1.13	+	5.33	0.000854	0.0351
polymeric cytoskeletal fiber (GO:0099513)	652	6	1.14	+	5.26	0.00091	0.0359
presynaptic cytosol (GO:0099523)	24	2	0.04	+	47.64	0.00094	0.0364
ciliary part (GO:0044441)	439	5	0.77	+	6.51	0.001	0.038
intracellular membrane-bounded organelle (GO:0043231)	10179	28	17.81	+	1.57	0.00114	0.0424
sperm flagellum (GO:0036126)	119	3	0.21	+	14.41	0.00126	0.046
GO Mitochondrion Cellular Component
Acly	ATP-citrate synthase;Acly;ortholog
Atp5f1	ATP synthase F(0) complex subunit B1, mitochondrial;Atp5f1;ortholog
Ckb	Creatine kinase B-type;Ckb;ortholog
Cycs	Cytochrome c, somatic;Cycs;ortholog
Ddah1	N(G),N(G)-dimethylarginine dimethylaminohydrolase 1;Ddah1;ortholog
Hk1	Hexokinase-1;Hk1;ortholog
Ldha	L-lactate dehydrogenase A chain;Ldha;ortholog
Mdh1	Malate dehydrogenase, cytoplasmic;Mdh1;ortholog
Nefh	Neurofilament heavy polypeptide;Nefh;ortholog
Snca	Alpha-synuclein;Snca;ortholog
Sncb	Beta-synuclein;Sncb;ortholog
Txn1	Thioredoxin;Txn;ortholog
Ywhaz	14-3-3 protein zeta/delta;Ywhaz;ortholog
