# Supplementary figures and images for: Quantitative transportomics identifies Kif5a as a major regulator of neurodegeneration
Source: eLife journal article supplement (doi:10.7554/elife.68148), 2022-03-08

Figure 1e

Raw Ponceau S

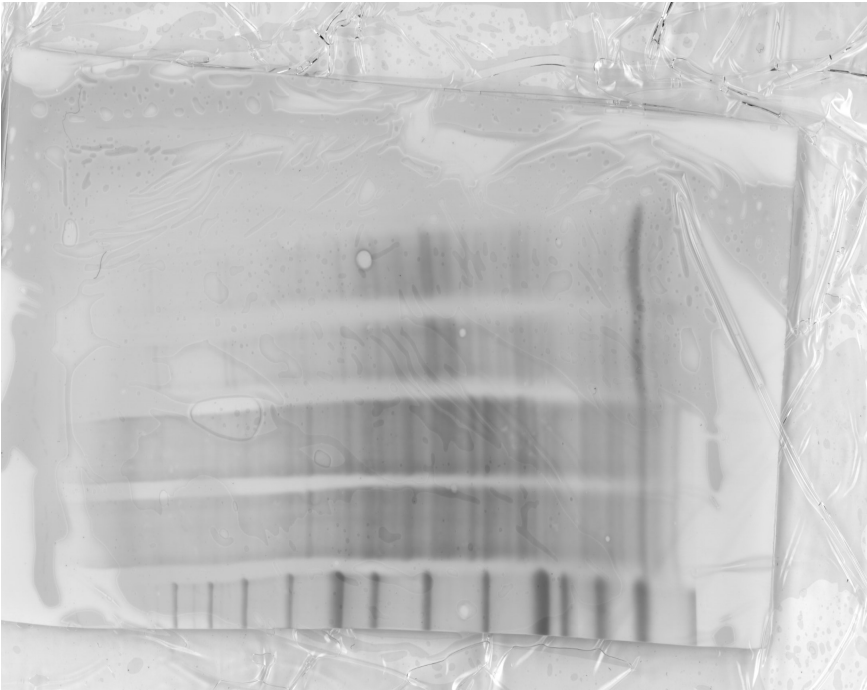

|                                                                                    | Retina |   | ON |   |
|------------------------------------------------------------------------------------|--------|---|----|---|
| ONC                                                                                | -      | + | -  | + |
| 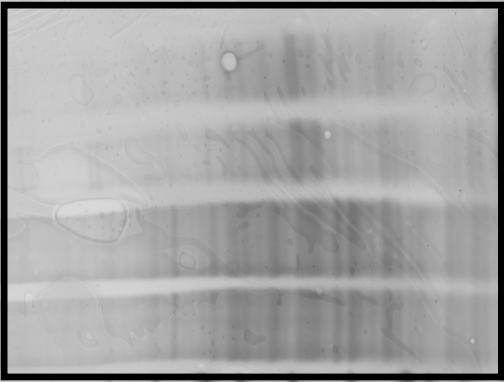 |        |   |    |   |

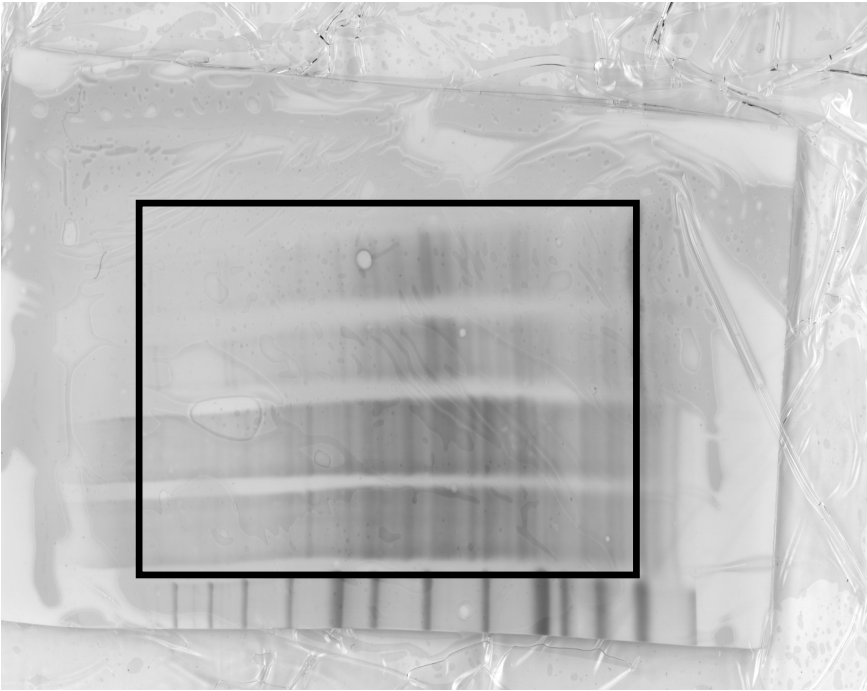

Figure 1f

Raw Western Blot

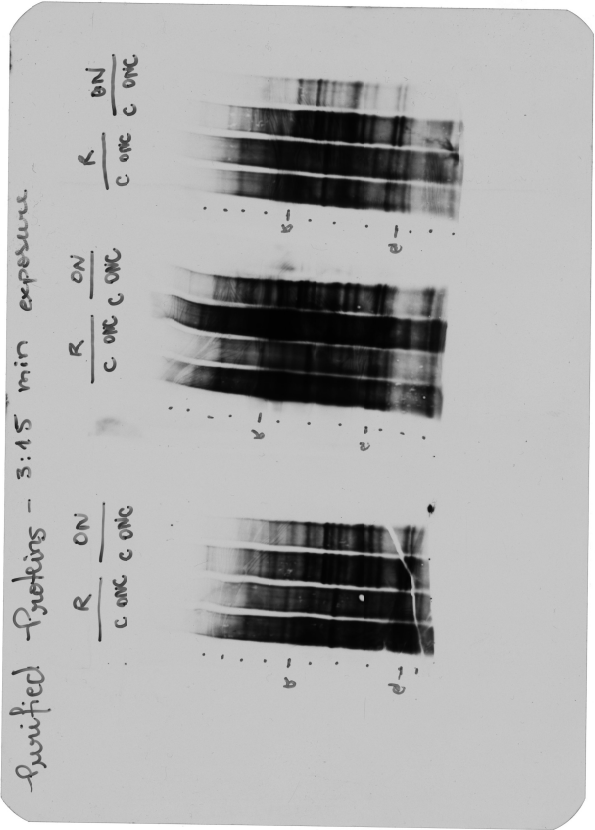

Labelled Lanes

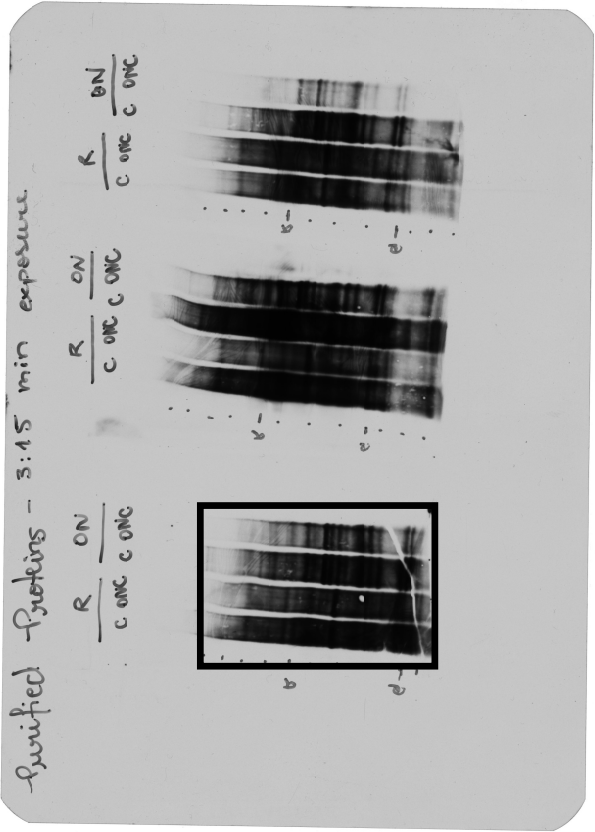

Supplement: fig1-data2 [file Figure 1- Source Data 2.pdf › Figure 1- Source Data 2.pdf]

Figure S1a NHS-Azide

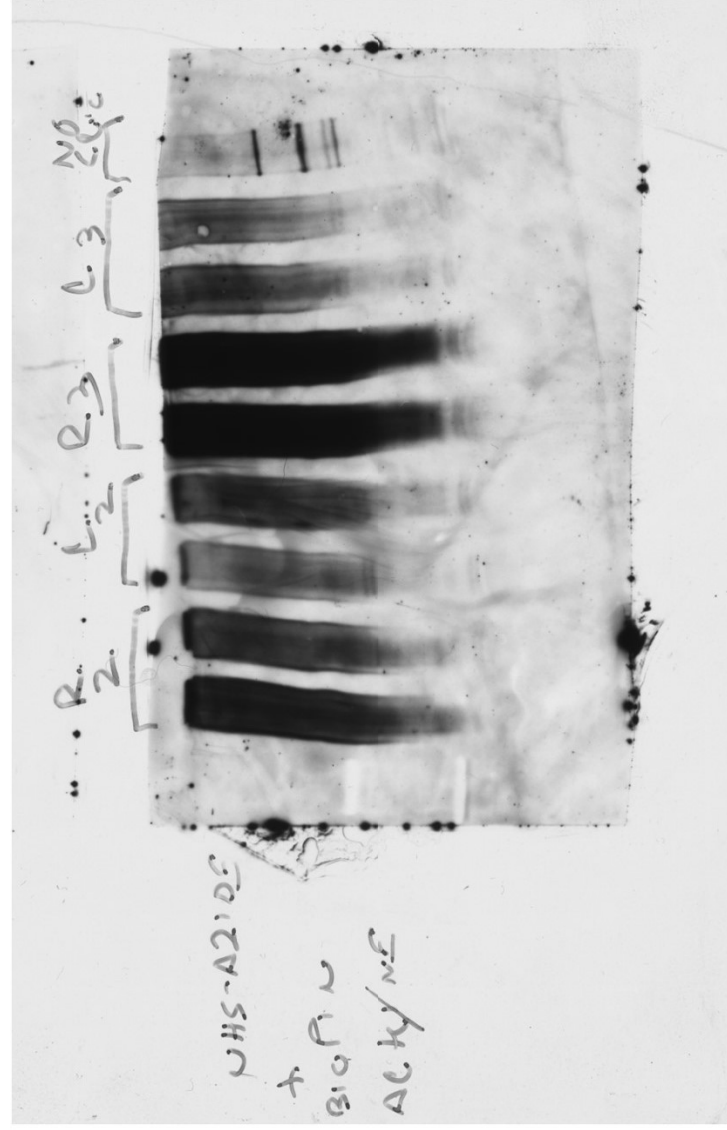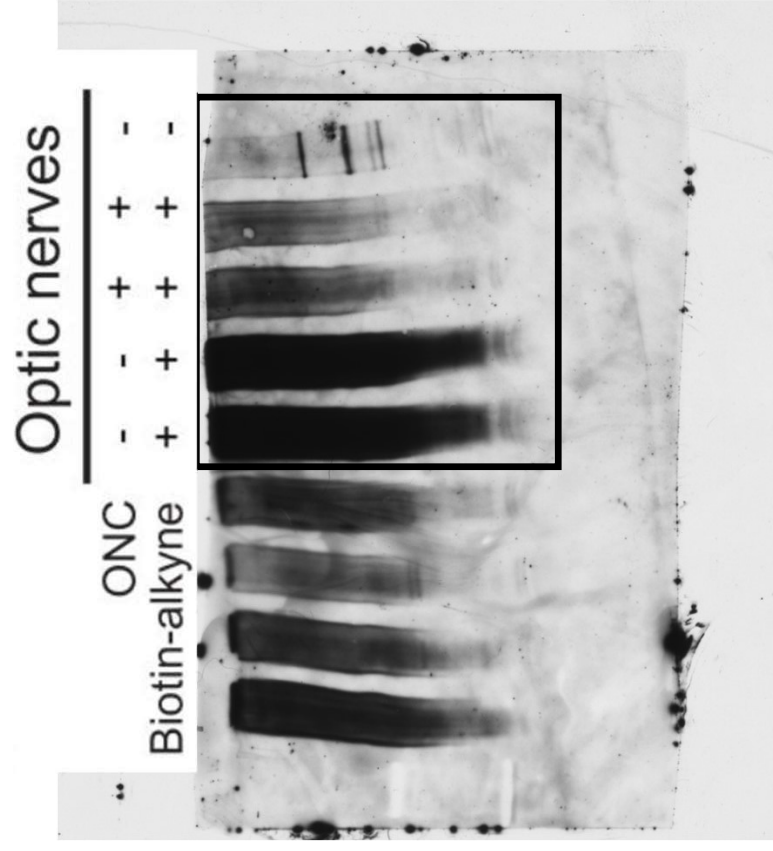

Figure S1b Biotin-beta-alanine

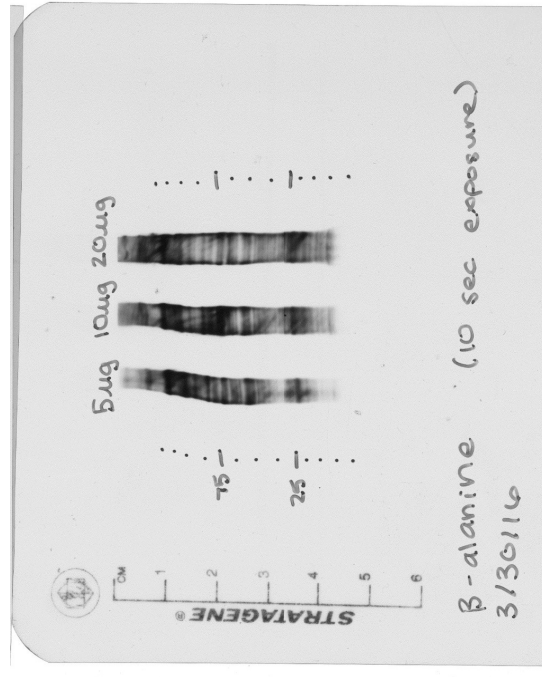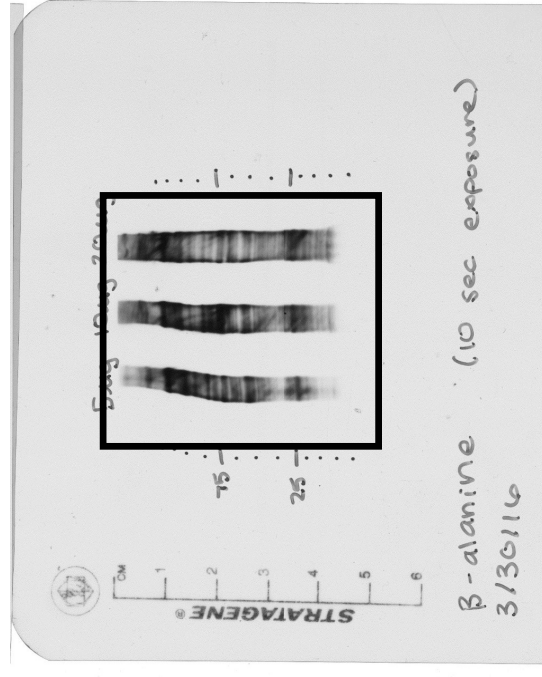

Supplement: fig1-figsupp1-data1 [file elife-68148-fig1-figsupp1-data1-v2.zip]

Figure S3 Kif5a<sup>fl/fl</sup> genotyping

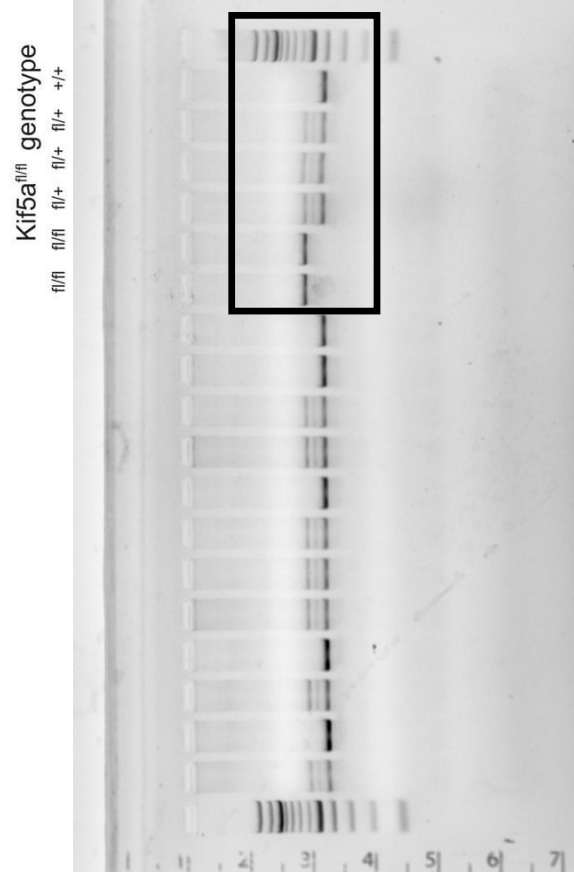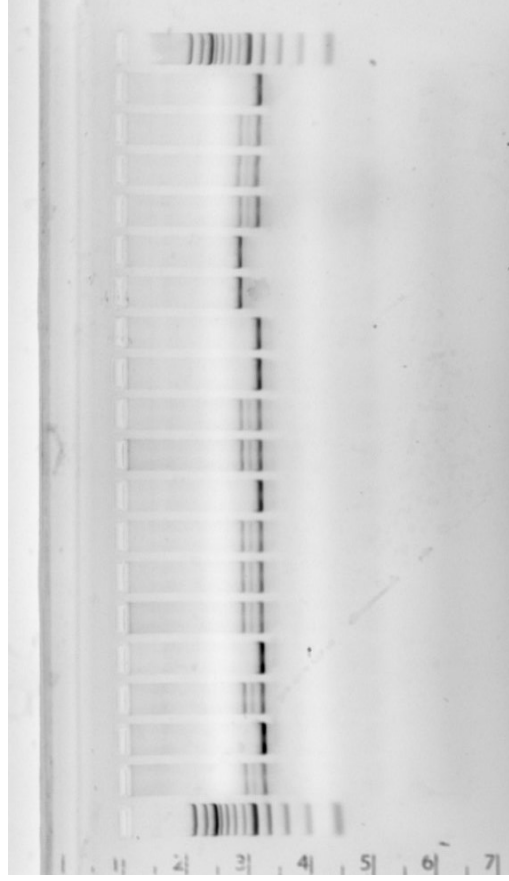

Supplement: fig4-figsupp1-data1 [file elife-68148-fig4-figsupp1-data1-v2.zip]

Figure 7a B3Tubulin Immunoprecipitation

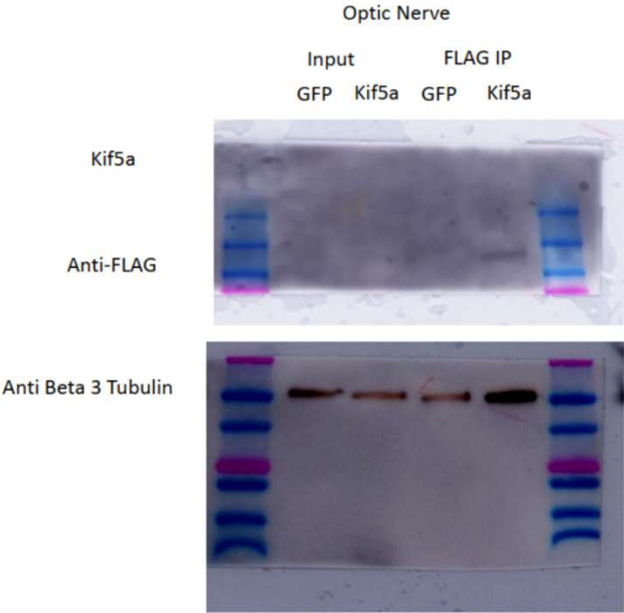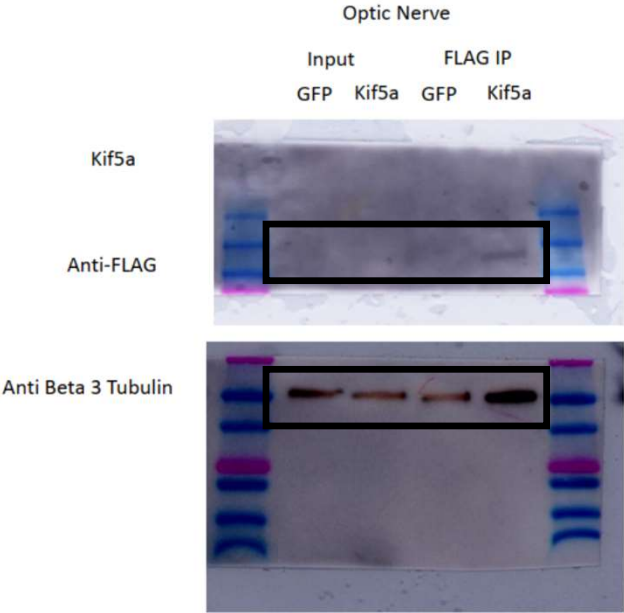

Supplement: fig7-data1 [file Figure 7- Source Data 1.pdf › Figure 7- Source Data 1.pdf]
